# Supplementary material for: Protein Extraction From FFPE Kidney Tissue Samples: A Review of the Literature and Characterization of Techniques
Source: Front Med (Lausanne). 2021 May 13;8:657313. doi: 10.3389/fmed.2021.657313 (PMC8158658; doi:10.3389/fmed.2021.657313)
Supplement: Supplementary Table 3 — List of the 468 common proteins identified after the extraction with the five SDS-containing buffers for their functional classification according to their biological process, molecular function and cellular component, using the FunRich program. [file Table_3.XLSX]

## Sheet: Molecular function
Dataset: common to all SDS Buffers
Enrichment analysis: Molecular function
Number of proteins in the dataset: 468
Number of proteins in the dataset (which are available in Molecular function database) :458
Number of proteins in background: 15623
						Corrected p-values
Molecular function	No. of genes in the dataset	No.of genes in the background dataset	Percentage of proteins	Fold enrichment	P-value (Hypergeometric test)	Bonferroni method	BH method	Q-value (Storey-Tibshirani method)	Mapped gene names
NAD binding	21	40	4.58515	17.9121	3.21642e-22	1.31552e-18	1.31552e-18	7.44069e-18	O75306; O75874; O43175; Q06278; P00338; Q9UBQ7; P30837; P40939; P51649; P05091; P40925; P07195; P09622; P23526; Q9BUT1; Q00796; P48735; P31937; P21695; P00352; P04406;
electron transfer activity	25	73	5.45852	11.6848	1.57649e-20	6.44786e-17	3.22393e-17	1.82349e-16	O75306; P31040; O43175; P38117; P21912; Q06278; P20674; P13804; P09417; Q9UI17; P16083; P46952; P30038; P35754; P05091; O43488; O75489; P28331; P09622; P14550; O95154; P19404; P27338; P00390; P11766;
identical protein binding	80	1094	17.4672	2.49467	1.61735e-14	6.61496e-11	2.20499e-11	1.24716e-10	P30101; P01008; P08123; P22626; P02792; P00441; P62258; P02452; Q06830; P61626; P48637; P04004; O75874; P11498; P55072; Q99497; O00757; Q03154; Q7Z4W1; P04792; Q06278; P25325; Q93099; P63261; P00966; P34896; P07910; P17858; P30048; P39060; P08670; P11310; P14174; P21266; P18827; P00338; P07355; P13716; Q9BYV1; P30038; P05062; P14618; P02647; P04424; P04179; P27348; P02766; P02511; P09467; P06727;…
cadherin binding	33	277	7.20524	4.06481	7.29482e-12	2.98358e-08	7.45896e-09	4.21885e-08	P28072; P13639; P50990; Q01082; Q13813; Q15365; P62258; Q06830; P08195; O75874; P37802; P11021; P18206; Q99497; P26641; P07737; P06733; P00338; P29692; P47756; P14618; P11142; P62826; P31946; P04075; P08238; P30041; P63104; P15311; Q15907; P61978; Q9Y490; P35579;
RNA binding	84	1383	18.3406	2.07203	7.33027e-11	2.99808e-07	5.99616e-08	3.39149e-07	P30101; P13639; Q01082; P22626; Q15365; P40926; P62258; O75390; P55084; P42765; Q06830; Q07020; P42704; P00505; Q9BRL6; P51991; P08195; Q00610; P12956; P25705; Q02978; P10809; P05783; P55072; P04792; P52758; Q14103; P50991; Q9UI17; P00966; P07737; Q16891; P07910; P53597; P0DMV9; P07585; P06748; P06733; P07355; P23284; Q99714; P49368; Q00577; P14618; P10599; P09429; P61604; P11142; O43707; P21291;…
unfolded protein binding	20	113	4.36681	6.03976	9.32229e-11	3.81282e-07	6.35469e-08	3.59427e-07	P50990; P11021; P10809; P50991; P0DMV9; P06748; P23284; P49368; P61604; P11142; P02511; P27824; P02743; P38646; P08238; P14625; P62937; P27797; P68371; P07900;
3-hydroxyacyl-CoA dehydrogenase activity	7	8	1.52838	29.8521	1.38758e-10	5.67519e-07	8.10742e-08	4.58563e-07	Q08426; P55084; Q9Y2S2; Q99714; P40939; Q16836; P51659;
antioxidant activity	9	19	1.96507	16.1671	1.05284e-09	4.30611e-06	5.38264e-07	3.04447e-06	P32119; P04040; P06702; P06727; P30044; P02768; P02649; P07148; P00738;
aldehyde dehydrogenase (NAD) activity	8	14	1.74672	19.5022	1.32091e-09	5.40251e-06	6.00278e-07	3.39523e-06	O75891; P30038; P30837; P05091; P51648; P49189; P00352; P49419;
structural constituent of cytoskeleton	18	107	3.93013	5.74089	1.92421e-09	7.87003e-06	7.87003e-07	4.45136e-06	Q01082; Q13813; P35527; P13647; P63261; P08670; P68363; P26038; P59998; P07437; P02533; P08727; P60709; P68366; Q9BVA1; P35908; Q9Y490; P68371;
protein homodimerization activity	54	806	11.7904	2.28572	1.10462e-08	4.51788e-05	4.10716e-06	2.32305e-05	P00441; O60494; P29401; P51606; P00505; P48637; O75874; P80404; Q9Y2S2; P08133; Q99497; P04792; O14732; Q14894; P02760; Q06278; P52758; P04040; P09417; P34896; P06748; P21266; P06733; P16083; P02679; Q9UBQ7; P35914; O43707; P06703; P02511; P51649; P06727; P67936; O43598; Q86XE5; Q9Y646; Q15257; P02730; P23246; P24752; P51659; Q15274; P08238; P30041; P02649; P34913; P27487; P27338; P02652; P59666;…
MHC class II protein complex binding	7	17	1.52838	14.0573	2.68029e-07	0.00109624	9.13531e-05	0.000516702	P62258; P05026; P14618; P11142; P50995; P08238; P07900;
proton-transporting ATP synthase activity, rotational mechanism	6	13	1.31004	15.7575	8.85118e-07	0.00362013	0.000278472	0.00157506	P25705; Q5VTU8; P36542; P48047; P30049; P06576;
enoyl-CoA hydratase activity	5	8	1.0917	21.3351	1.10306e-06	0.00451153	0.000311597	0.00176242	P30084; Q08426; P55084; P42126; P40939;
flavin adenine dinucleotide binding	11	60	2.40175	6.25826	1.14277e-06	0.00467395	0.000311597	0.00176242	P31040; Q8NE62; Q06278; P13804; P11310; P09622; P49748; P27338; P26440; P00390; P45954;
transmembrane transporter activity	10	49	2.18341	6.96689	1.2528e-06	0.00512393	0.000320246	0.00181134	O75947; P25705; P56134; P56385; P36542; P48047; P30049; P06576; P24539; P29972;
thioredoxin peroxidase activity	4	5	0.873362	27.3021	3.56138e-06	0.0145661	0.000856827	0.00484629	Q06830; P32119; P30048; P30044;
cytochrome-c oxidase activity	7	24	1.52838	9.959	3.99096e-06	0.016323	0.000906835	0.00512915	P00403; P14854; P20674; P00167; P10606; P13073; P09669;
amino acid binding	6	17	1.31004	12.052	5.77572e-06	0.0236227	0.0012433	0.00703222	P00505; P00966; Q14117; P20711; O94760; P34897;
platelet-derived growth factor binding	5	11	1.0917	15.5217	8.45786e-06	0.0345927	0.00172963	0.00978296	P08123; P02452; P02461; P12109; P02462;
phosphatidylcholine-sterol O-acyltransferase activator activity	4	6	0.873362	22.7593	1.04359e-05	0.042683	0.00203252	0.0114961	P02647; P06727; P02649; P02652;
protein binding involved in protein folding	7	28	1.52838	8.53679	1.23334e-05	0.0504437	0.0022929	0.0129688	P50990; P10809; P04792; P50991; P0DMV9; P49368; P27797;
chaperone binding	12	91	2.62009	4.50136	1.3498e-05	0.0552068	0.00240029	0.0135763	P00441; P11021; P10809; P98164; P10909; P02675; P61604; P53634; P05023; P02768; P27797; Q02218;
pyridoxal phosphate binding	9	53	1.96507	5.79771	2.08226e-05	0.0851646	0.00353071	0.01997	P17174; P00505; P80404; Q969Z3; P34896; Q9BYV1; P20711; P02768; P34897;
acetyl-CoA C-acyltransferase activity	3	3	0.655022	34.1106	2.50344e-05	0.102391	0.00353071	0.01997	P55084; P42765; P09110;
3 iron, 4 sulfur cluster binding	3	3	0.655022	34.1106	2.50344e-05	0.102391	0.00353071	0.01997	P21912; Q99798; P21399;
adenine transmembrane transporter activity	3	3	0.655022	34.1106	2.50344e-05	0.102391	0.00353071	0.01997	P12235; P12236; P05141;
ATP:ADP antiporter activity	3	3	0.655022	34.1106	2.50344e-05	0.102391	0.00353071	0.01997	P12235; P12236; P05141;
long-chain-enoyl-CoA hydratase activity	3	3	0.655022	34.1106	2.50344e-05	0.102391	0.00353071	0.01997	Q08426; P40939; P51659;
enzyme binding	25	341	5.45852	2.50171	2.59512e-05	0.10614	0.00353801	0.0200113	P01023; Q08426; P62258; P11279; P00505; P11021; P10809; Q99497; P04040; P0DMV9; P21266; P26038; P00167; P02647; P59998; P11142; P20711; P31946; P35232; P07237; P68366; P24752; P05165; Q14019; P30086;
receptor binding	26	373	5.67686	2.37854	4.24598e-05	0.173661	0.00558978	0.0316163	P01023; Q08426; O75874; Q99497; Q9UHK6; P04040; P0DMV9; P14174; O14745; Q9P0Z9; P02679; P04196; P26038; P02675; P35914; P01024; P30044; P23528; Q15257; P01042; P51659; P02671; P34913; P27487; Q13011; Q9BTZ2;
oxidoreductase activity, acting on NAD(P)H, quinone or similar compound as acceptor	4	8	0.873362	17.0766	4.64676e-05	0.190053	0.00558978	0.0316163	P42330; P16152; Q7Z4W1; Q9BTZ2;
carboxylic acid binding	4	8	0.873362	17.0766	4.64676e-05	0.190053	0.00558978	0.0316163	P17174; P35558; Q9UBQ7; P35914;
peptide disulfide oxidoreductase activity	4	8	0.873362	17.0766	4.64676e-05	0.190053	0.00558978	0.0316163	P30101; P10599; P07237; Q15084;
aldo-keto reductase (NADP) activity	5	15	1.0917	11.3854	4.98751e-05	0.203989	0.00582826	0.0329652	P42330; P00167; O43488; P14550; O95154;
double-stranded RNA binding	9	61	1.96507	5.03748	6.62234e-05	0.270854	0.00752371	0.0425548	P08195; Q00610; P10809; P08670; P68363; P26038; P08238; P68371; Q00839;
ubiquitin protein ligase binding	22	300	4.80349	2.5025	7.83701e-05	0.320534	0.00866307	0.0489991	O75306; P62258; P42704; P60174; P11021; P10809; P18206; P55072; P63261; P0DMV9; P12277; P68363; P10909; P11142; P05141; P07437; P38646; P31930; P30041; P63104; P06744; P27797;
L-malate dehydrogenase activity	3	4	0.655022	25.6042	9.79498e-05	0.400615	0.0102722	0.0581003	P40926; O43175; P40925;
peroxiredoxin activity	3	4	0.655022	25.6042	9.79498e-05	0.400615	0.0102722	0.0581003	Q99497; P30044; P30041;
glutathione transferase activity	6	27	1.31004	7.58996	0.000107666	0.440355	0.0110089	0.0622673	P26641; P30711; P21266; O14880; P09211; P78417;
MHC class I protein binding	5	18	1.0917	9.48885	0.000132302	0.541117	0.0128837	0.0728716	P25705; P55072; P07437; P06576; P68371;
translation elongation factor activity	5	18	1.0917	9.48885	0.000132302	0.541117	0.0128837	0.0728716	P13639; P26641; P29692; P49411; Q5VTE0;
glutathione peroxidase activity	5	20	1.0917	8.54044	0.000228074	0.932824	0.0216936	0.122701	P30711; O14880; P22352; P09211; P30041;
fructose binding	3	5	0.655022	20.4936	0.000239532	0.979687	0.0217708	0.123138	P17858; P05062; P04075;
monosaccharide binding	3	5	0.655022	20.4936	0.000239532	0.979687	0.0217708	0.123138	P09467; P37837; P06744;
disordered domain specific binding	6	32	1.31004	6.4044	0.000291129	1	0.0253344	0.143294	Q00610; P0DP25; P08238; P15311; P04406; P07900;
ADP binding	6	32	1.31004	6.4044	0.000291129	1	0.0253344	0.143294	P55072; P14618; P05023; P00367; P10412; P35579;
low-density lipoprotein particle receptor binding	5	22	1.0917	7.76439	0.000369083	1	0.0314489	0.177878	P98160; Q00610; P10909; P02649; P14625;
protein complex binding	17	228	3.71179	2.54472	0.000412353	1	0.0338623	0.191528	Q01082; Q5T2W1; O00483; P05787; O14745; P10909; P23284; Q00325; P40939; P02511; P62826; P21796; P22695; P31946; P07437; P08727; P31930;
NADPH binding	4	13	0.873362	10.5137	0.000422243	1	0.0338623	0.191528	P09417; Q16698; Q9UBQ7; Q08257;
S100 protein binding	4	13	0.873362	10.5137	0.000422243	1	0.0338623	0.191528	P07355; P06703; P50995; P15311;
extracellular matrix structural constituent	8	62	1.74672	4.40616	0.000432751	1	0.0340376	0.19252	P08123; P02452; P51888; P02461; P08572; P02462; P51884; P21810;
serine-type endopeptidase inhibitor activity	10	96	2.18341	3.55637	0.000504153	1	0.0389054	0.220053	P05155; P01008; P01023; P02760; Q14624; P04196; P01011; P12111; P01009; P30086;
actin filament binding	13	152	2.83843	2.91941	0.000540359	1	0.0409272	0.231488	P13639; Q01995; P60981; Q8TF72; P06396; P47756; O43707; P67936; P23528; P06753; P15311; Q9Y490; P35579;
thyroid hormone binding	3	7	0.655022	14.6466	0.000802261	1	0.0501079	0.283415	Q14894; P14618; P02766;
alditol:NADP+ 1-oxidoreductase activity	3	7	0.655022	14.6466	0.000802261	1	0.0501079	0.283415	P42330; O43488; P14550;
aminopeptidase activity	5	26	1.0917	6.57033	0.000837032	1	0.0501079	0.283415	O43895; P28838; Q07075; P12955; P15144;
pyruvate dehydrogenase activity	2	2	0.436681	34.1106	0.000857592	1	0.0501079	0.283415	P08559; P11177;
aconitate hydratase activity	2	2	0.436681	34.1106	0.000857592	1	0.0501079	0.283415	Q99798; P21399;
pyruvate kinase activity	2	2	0.436681	34.1106	0.000857592	1	0.0501079	0.283415	P30613; P14618;
succinate-CoA ligase (ADP-forming) activity	2	2	0.436681	34.1106	0.000857592	1	0.0501079	0.283415	Q9P2R7; P53597;
L-allo-threonine aldolase activity	2	2	0.436681	34.1106	0.000857592	1	0.0501079	0.283415	P34896; P34897;
fructose 1,6-bisphosphate 1-phosphatase activity	2	2	0.436681	34.1106	0.000857592	1	0.0501079	0.283415	O00757; P09467;
glycine hydroxymethyltransferase activity	2	2	0.436681	34.1106	0.000857592	1	0.0501079	0.283415	P34896; P34897;
isocitrate dehydrogenase (NADP+) activity	2	2	0.436681	34.1106	0.000857592	1	0.0501079	0.283415	O75874; P48735;
succinate-CoA ligase (GDP-forming) activity	2	2	0.436681	34.1106	0.000857592	1	0.0501079	0.283415	Q96I99; P53597;
peptidyltransferase activity	2	2	0.436681	34.1106	0.000857592	1	0.0501079	0.283415	P19440; P36269;
leukotriene-C(4) hydrolase	2	2	0.436681	34.1106	0.000857592	1	0.0501079	0.283415	P19440; P36269;
phosphoenolpyruvate carboxykinase (GTP) activity	2	2	0.436681	34.1106	0.000857592	1	0.0501079	0.283415	P35558; Q16822;
propionyl-CoA carboxylase activity	2	2	0.436681	34.1106	0.000857592	1	0.0501079	0.283415	P05166; P05165;
heat shock protein binding	7	54	1.52838	4.42725	0.000956637	1	0.0551077	0.311694	P0DMV9; P29692; P02647; P11142; P08238; P02652; Q02218;
hydrogen ion transmembrane transporter activity	4	16	0.873362	8.54364	0.00100224	1	0.0561841	0.317782	O75947; P56385; P21281; P24539;
lipid transporter activity	5	27	1.0917	6.32707	0.0010028	1	0.0561841	0.317782	P06727; P02649; P02652; P05090; P17900;
drug binding	8	72	1.74672	3.79428	0.00118757	1	0.0656373	0.371251	O60494; P98164; P02768; P48047; P09211; P08238; P00491; P07148;
isomerase activity	3	8	0.655022	12.8181	0.00125574	1	0.0667009	0.377266	P30039; P51659; Q13011;
high-density lipoprotein particle binding	3	8	0.655022	12.8181	0.00125574	1	0.0667009	0.377266	P10809; P02647; P02652;
acyl-CoA ligase activity	3	8	0.655022	12.8181	0.00125574	1	0.0667009	0.377266	Q68CK6; Q96CM8; Q08AH3;
cholesterol transporter activity	4	18	0.873362	7.59487	0.00160856	1	0.0843461	0.47707	P02647; P06727; P02649; P02652;
cholesterol binding	6	44	1.31004	4.65814	0.00168597	1	0.0872863	0.493699	P08133; P02647; P06727; P02649; P02652; P05090;
protein domain specific binding	16	243	3.49345	2.24728	0.00222384	1	0.105338	0.5958	P62258; P11279; P11021; P55072; P08670; P27348; P62826; P20711; P31946; P07437; P05023; P63104; P15311; P61978; P62805; P35579;
L-aspartate:2-oxoglutarate aminotransferase activity	2	3	0.436681	22.7782	0.00252271	1	0.105338	0.5958	P17174; P00505;
fructose-bisphosphate aldolase activity	2	3	0.436681	22.7782	0.00252271	1	0.105338	0.5958	P05062; P04075;
long-chain-3-hydroxyacyl-CoA dehydrogenase activity	2	3	0.436681	22.7782	0.00252271	1	0.105338	0.5958	P55084; P40939;
oxidoreductase activity, acting on peroxide as acceptor	2	3	0.436681	22.7782	0.00252271	1	0.105338	0.5958	Q99497; P04040;
acetyl-CoA C-acetyltransferase activity	2	3	0.436681	22.7782	0.00252271	1	0.105338	0.5958	P40939; P24752;
apolipoprotein receptor binding	2	3	0.436681	22.7782	0.00252271	1	0.105338	0.5958	P02647; P02652;
metallodipeptidase activity	2	3	0.436681	22.7782	0.00252271	1	0.105338	0.5958	Q9Y646; P16444;
succinate dehydrogenase (ubiquinone) activity	2	3	0.436681	22.7782	0.00252271	1	0.105338	0.5958	P31040; P21912;
nicotinate-nucleotide diphosphorylase (carboxylating) activity	2	3	0.436681	22.7782	0.00252271	1	0.105338	0.5958	Q6XQN6; Q15274;
high-density lipoprotein particle receptor binding	2	3	0.436681	22.7782	0.00252271	1	0.105338	0.5958	P02647; P02652;
thiosulfate sulfurtransferase activity	2	3	0.436681	22.7782	0.00252271	1	0.105338	0.5958	P25325; Q16762;
L-phenylalanine:2-oxoglutarate aminotransferase activity	2	3	0.436681	22.7782	0.00252271	1	0.105338	0.5958	P17174; P00505;
pyruvate dehydrogenase (acetyl-transferring) activity	2	3	0.436681	22.7782	0.00252271	1	0.105338	0.5958	P08559; P11177;
dodecenoyl-CoA delta-isomerase activity	2	3	0.436681	22.7782	0.00252271	1	0.105338	0.5958	Q08426; P42126;
dATP binding	2	3	0.436681	22.7782	0.00252271	1	0.105338	0.5958	P08238; P10412;
long-chain fatty acid binding	2	3	0.436681	22.7782	0.00252271	1	0.105338	0.5958	P52758; P05413;
Toll-like receptor 4 binding	2	3	0.436681	22.7782	0.00252271	1	0.105338	0.5958	P06702; P05109;
endopeptidase inhibitor activity	5	33	1.0917	5.17705	0.00255204	1	0.105338	0.5958	P02765; P51606; Q14624; P01024; P0C0L5;
NADP binding	5	33	1.0917	5.17705	0.00255204	1	0.105338	0.5958	O75874; Q14894; P04040; P00390; P04406;
ferric iron binding	3	10	0.655022	10.257	0.0025755	1	0.105338	0.5958	P02792; P02787; P02794;
proton-transporting ATPase activity, rotational mechanism	4	21	0.873362	6.51041	0.0029348	1	0.118845	0.672198	P36543; P38606; P21281; P06576;
glutathione binding	3	11	0.655022	9.32543	0.00346473	1	0.13758	0.778166	P48637; P21266; P09211;
RAGE receptor binding	3	11	0.655022	9.32543	0.00346473	1	0.13758	0.778166	P06702; P05109; P09429;
2 iron, 2 sulfur cluster binding	4	22	0.873362	6.21461	0.00350496	1	0.137839	0.779632	P21912; Q06278; P28331; P19404;
catalytic activity	6	53	1.31004	3.86729	0.00439602	1	0.17117	0.968155	O75891; P08195; Q96DC8; O43451; P13716; O94760;
protease binding	9	108	1.96507	2.84545	0.00446246	1	0.17117	0.968155	P01008; P08123; P01023; P02452; P02461; P14174; P07355; P01009; P27487;
ATPase activity, coupled	3	12	0.655022	8.54896	0.0045199	1	0.17117	0.968155	P50990; P0DMV9; P11142;
acyl-CoA dehydrogenase activity	3	12	0.655022	8.54896	0.0045199	1	0.17117	0.968155	P11310; P49748; P45954;
hemoglobin binding	2	4	0.436681	17.0978	0.00494746	1	0.174441	0.986653	P68871; P00738;
superoxide dismutase activity	2	4	0.436681	17.0978	0.00494746	1	0.174441	0.986653	P00441; P04179;
phosphoserine residue binding	2	4	0.436681	17.0978	0.00494746	1	0.174441	0.986653	P62258; P31946;
angiostatin binding	2	4	0.436681	17.0978	0.00494746	1	0.174441	0.986653	P25705; P06576;
myosin II binding	2	4	0.436681	17.0978	0.00494746	1	0.174441	0.986653	O14745; P06396;
carbonyl reductase (NADPH) activity	2	4	0.436681	17.0978	0.00494746	1	0.174441	0.986653	P16152; Q9BTZ2;
nucleoside binding	2	4	0.436681	17.0978	0.00494746	1	0.174441	0.986653	O43707; P00491;
glycine N-acyltransferase activity	2	4	0.436681	17.0978	0.00494746	1	0.174441	0.986653	Q969I3; Q6IB77;
oxygen carrier activity	3	13	0.655022	7.89185	0.0057492	1	0.199273	1	P02042; P68871; P69905;
potassium ion binding	3	13	0.655022	7.89185	0.0057492	1	0.199273	1	P30613; P14618; P05023;
4 iron, 4 sulfur cluster binding	5	40	1.0917	4.27129	0.00598454	1	0.205687	1	O75306; P21912; P28331; Q99798; P21399;
actin binding	16	272	3.49345	2.00769	0.00662095	1	0.225664	1	Q01082; Q13813; Q01518; P18206; P07737; P06396; P47756; P26038; P59998; P47755; O43707; P04075; P15311; Q14019; P35579; Q00839;
structural constituent of epidermis	3	14	0.655022	7.32855	0.00715966	1	0.240025	1	P13645; P04264; P35908;
fatty acid binding	3	14	0.655022	7.32855	0.00715966	1	0.240025	1	P02768; P07148; P11766;
iron ion binding	10	139	2.18341	2.45628	0.00785201	1	0.246807	1	P02792; P02042; Q06278; P00439; P02794; O75936; Q99798; P68871; P27797; P69905;
calcium-dependent protein binding	6	60	1.31004	3.41618	0.00807965	1	0.246807	1	P01023; P08133; P07355; P06703; P50995; P09525;
long-chain fatty acid transporter activity	2	5	0.436681	13.6851	0.00808608	1	0.246807	1	P05413; P07148;
biotin binding	2	5	0.436681	13.6851	0.00808608	1	0.246807	1	P11498; P05165;
aminoacylase activity	2	5	0.436681	13.6851	0.00808608	1	0.246807	1	Q03154; P04040;
arachidonic acid binding	2	5	0.436681	13.6851	0.00808608	1	0.246807	1	P06702; P05109;
epoxide hydrolase activity	2	5	0.436681	13.6851	0.00808608	1	0.246807	1	P34913; P07099;
keratin filament binding	2	5	0.436681	13.6851	0.00808608	1	0.246807	1	P08670; P02533;
biotin carboxylase activity	2	5	0.436681	13.6851	0.00808608	1	0.246807	1	P11498; P05165;
nitric-oxide synthase regulator activity	2	5	0.436681	13.6851	0.00808608	1	0.246807	1	P08238; P07900;
hypoglycin A gamma-glutamyl transpeptidase activity	2	5	0.436681	13.6851	0.00808608	1	0.246807	1	P19440; P36269;
L-lactate dehydrogenase activity	2	5	0.436681	13.6851	0.00808608	1	0.246807	1	P00338; P07195;
structural molecule activity	14	231	3.05677	2.0687	0.00835176	1	0.253028	1	Q00610; P13646; P48668; P18206; P05783; P05787; P39060; P68363; P02679; P02675; P07437; P02649; P02671; P02545;
NAD+ binding	3	15	0.655022	6.84031	0.00875723	1	0.261438	1	Q9Y2S2; P00367; Q16836;
fatty-acyl-CoA binding	3	15	0.655022	6.84031	0.00875723	1	0.261438	1	P35914; P40939; Q02252;
NADH dehydrogenase (ubiquinone) activity	5	45	1.0917	3.79681	0.00986489	1	0.292373	1	O75306; O00483; O75489; P28331; P19404;
DNA polymerase binding	3	16	0.655022	6.41305	0.0105468	1	0.308118	1	P09429; P08238; P07900;
ubiquitin-specific protease binding	3	16	0.655022	6.41305	0.0105468	1	0.308118	1	Q00610; P55072; Q99497;
phospholipid binding	7	83	1.52838	2.88056	0.0108839	1	0.315711	1	Q01082; P00505; P02647; P08758; P02649; P02652; P07148;
calcium-dependent phospholipid binding	5	47	1.0917	3.63527	0.0118113	1	0.324332	1	P08133; P07355; P50995; P08758; P09525;
voltage-gated anion channel activity	2	6	0.436681	11.408	0.0118948	1	0.324332	1	P45880; P21796;
porin activity	2	6	0.436681	11.408	0.0118948	1	0.324332	1	P45880; P21796;
aldehyde dehydrogenase [NAD(P)+] activity	2	6	0.436681	11.408	0.0118948	1	0.324332	1	P05091; P51648;
arylesterase activity	2	6	0.436681	11.408	0.0118948	1	0.324332	1	P00918; P00915;
oxidoreductase activity, acting on NAD(P)H	2	6	0.436681	11.408	0.0118948	1	0.324332	1	Q16698; O95831;
molybdopterin cofactor binding	2	6	0.436681	11.408	0.0118948	1	0.324332	1	Q969Z3; Q06278;
C3HC4-type RING finger domain binding	2	6	0.436681	11.408	0.0118948	1	0.324332	1	P0DMV9; P11142;
lipase inhibitor activity	2	6	0.436681	11.408	0.0118948	1	0.324332	1	P02647; P02652;
magnesium ion binding	12	196	2.62009	2.09004	0.0130192	1	0.343557	1	Q9H2U2; P35558; P48637; O75874; P36871; P30613; P06733; P14618; P35914; P62826; P48735; P34913;
ATPase activity	9	128	1.96507	2.40088	0.0130844	1	0.343557	1	P11021; P10809; P55072; P0DMV9; P11142; P48047; P30049; P35579; P07900;
histone deacetylase binding	8	107	1.74672	2.55328	0.0133746	1	0.343557	1	P62258; Q14103; P0DMV9; P31946; P35232; P23246; P08238; P07900;
heme binding	9	129	1.96507	2.38227	0.0137144	1	0.343557	1	P02042; P02760; P04040; P04196; P00167; P99999; P68871; O00264; P69905;
fatty-acyl-CoA synthase activity	2	7	0.436681	9.78065	0.0163318	1	0.343557	1	Q68CK6; Q08AH3;
protein-disulfide reductase activity	2	7	0.436681	9.78065	0.0163318	1	0.343557	1	P00558; P10599;
N6-methyladenosine-containing RNA binding	2	7	0.436681	9.78065	0.0163318	1	0.343557	1	P22626; P07910;
selenium binding	2	7	0.436681	9.78065	0.0163318	1	0.343557	1	Q13228; P22352;
fatty acid ligase activity	2	7	0.436681	9.78065	0.0163318	1	0.343557	1	Q68CK6; Q08AH3;
retinal dehydrogenase activity	2	7	0.436681	9.78065	0.0163318	1	0.343557	1	P42330; P00352;
ankyrin binding	3	19	0.655022	5.401	0.0171035	1	0.343557	1	Q01082; P05023; P02730;
single-stranded DNA binding	7	91	1.52838	2.62735	0.0174153	1	0.343557	1	Q15365; P42704; P10809; Q00577; P09429; P61978; Q00839;
manganese ion binding	5	52	1.0917	3.2858	0.0177788	1	0.343557	1	P35558; P28838; P35914; P04179; P12955;
cytoskeletal protein binding	5	52	1.0917	3.2858	0.0177788	1	0.343557	1	P07355; P05062; P04075; P35908; P05413;
protein disulfide isomerase activity	3	20	0.655022	5.13108	0.0196927	1	0.343557	1	P30101; P07237; Q15084;
metalloaminopeptidase activity	3	20	0.655022	5.13108	0.0196927	1	0.343557	1	O43895; Q07075; P15144;
copper ion binding	5	54	1.0917	3.16412	0.0206368	1	0.343557	1	P00403; P00441; Q99497; P06727; P02768;
butyrate-CoA ligase activity	2	8	0.436681	8.5596	0.0213572	1	0.343557	1	Q68CK6; Q08AH3;
complement component C1q binding	2	8	0.436681	8.5596	0.0213572	1	0.343557	1	P02743; P27797;
virion binding	2	8	0.436681	8.5596	0.0213572	1	0.343557	1	P02743; P62937;
glutathione hydrolase activity	2	8	0.436681	8.5596	0.0213572	1	0.343557	1	P19440; P36269;
TPR domain binding	2	8	0.436681	8.5596	0.0213572	1	0.343557	1	P08238; P07900;
phospholipase inhibitor activity	2	8	0.436681	8.5596	0.0213572	1	0.343557	1	P08758; P09525;
adenylate kinase activity	2	8	0.436681	8.5596	0.0213572	1	0.343557	1	P27144; P54819;
scaffold protein binding	5	55	1.0917	3.1066	0.0221719	1	0.343557	1	P05783; Q99497; P13647; P05787; P08670;
phosphatidylcholine binding	3	21	0.655022	4.88686	0.0224856	1	0.343557	1	P02647; P06727; P02652;
FAD binding	3	21	0.655022	4.88686	0.0224856	1	0.343557	1	Q9UF12; P16083; O95831;
GTP binding	18	372	3.93013	1.65139	0.0264258	1	0.343557	1	P13639; P35558; Q96I99; P27144; P08133; P68363; Q16822; P62826; P07437; P49411; P00367; P68366; P08238; Q5VTE0; Q9BVA1; Q15907; P10412; P68371;
NADP-retinol dehydrogenase activity	2	9	0.436681	7.60959	0.0269328	1	0.343557	1	P42330; Q9BTZ2;
phosphatidylethanolamine binding	2	9	0.436681	7.60959	0.0269328	1	0.343557	1	P50995; P30086;
AT DNA binding	2	9	0.436681	7.60959	0.0269328	1	0.343557	1	Q14103; P07305;
chloride ion binding	2	9	0.436681	7.60959	0.0269328	1	0.343557	1	P16083; P53634;
iron-sulfur cluster binding	2	9	0.436681	7.60959	0.0269328	1	0.343557	1	P80404; P28331;
peptide binding	5	58	1.0917	2.94594	0.0272146	1	0.343557	1	Q07075; P08473; P15144; P08238; P27797;
extracellular matrix binding	3	23	0.655022	4.4621	0.0286831	1	0.343557	1	P04004; P07585; P21810;
protein C-terminus binding	11	195	2.40175	1.92584	0.0289965	1	0.343557	1	P98160; P05026; P12956; P30048; P08670; P18827; P27348; P31946; P35232; P15311; Q99623;
oxidoreductase activity, acting on the CH-NH group of donors	1	1	0.218341	34.1106	0.0293158	1	0.343557	1	Q9UF12;
15-hydroxyprostaglandin-D dehydrogenase (NADP+) activity	1	1	0.218341	34.1106	0.0293158	1	0.343557	1	P42330;
10-hydroxy-9-(phosphonooxy)octadecanoate phosphatase activity	1	1	0.218341	34.1106	0.0293158	1	0.343557	1	P34913;
L-glucuronate reductase activity	1	1	0.218341	34.1106	0.0293158	1	0.343557	1	P14550;
icosatetraenoic acid binding	1	1	0.218341	34.1106	0.0293158	1	0.343557	1	P05413;
fumarylacetoacetase activity	1	1	0.218341	34.1106	0.0293158	1	0.343557	1	P16930;
TFIIH-class transcription factor binding	1	1	0.218341	34.1106	0.0293158	1	0.343557	1	Q00839;
phosphoglycerate dehydrogenase activity	1	1	0.218341	34.1106	0.0293158	1	0.343557	1	O43175;
lipoamide binding	1	1	0.218341	34.1106	0.0293158	1	0.343557	1	P09622;
O-phospho-L-serine:2-oxoglutarate aminotransferase activity	1	1	0.218341	34.1106	0.0293158	1	0.343557	1	Q9Y617;
(R)-3-amino-2-methylpropionate-pyruvate transaminase activity	1	1	0.218341	34.1106	0.0293158	1	0.343557	1	Q9BYV1;
CTP binding	1	1	0.218341	34.1106	0.0293158	1	0.343557	1	P08238;
cis-stilbene-oxide hydrolase activity	1	1	0.218341	34.1106	0.0293158	1	0.343557	1	P07099;
4-hydroxy-2-oxoglutarate aldolase activity	1	1	0.218341	34.1106	0.0293158	1	0.343557	1	Q86XE5;
4-hydroxyphenylpyruvate dioxygenase activity	1	1	0.218341	34.1106	0.0293158	1	0.343557	1	P32754;
dihydrotestosterone 17-beta-dehydrogenase activity	1	1	0.218341	34.1106	0.0293158	1	0.343557	1	P42330;
1-pyrroline-5-carboxylate dehydrogenase activity	1	1	0.218341	34.1106	0.0293158	1	0.343557	1	P30038;
deoxyribonucleoside 5'-monophosphate N-glycosidase activity	1	1	0.218341	34.1106	0.0293158	1	0.343557	1	O43598;
long-chain-aldehyde dehydrogenase activity	1	1	0.218341	34.1106	0.0293158	1	0.343557	1	P51648;
medium-chain-aldehyde dehydrogenase activity	1	1	0.218341	34.1106	0.0293158	1	0.343557	1	P51648;
betaine-aldehyde dehydrogenase activity	1	1	0.218341	34.1106	0.0293158	1	0.343557	1	P49419;
4-trimethylammoniobutyraldehyde dehydrogenase activity	1	1	0.218341	34.1106	0.0293158	1	0.343557	1	P49189;
aminobutyraldehyde dehydrogenase activity	1	1	0.218341	34.1106	0.0293158	1	0.343557	1	P49189;
L-aminoadipate-semialdehyde dehydrogenase activity	1	1	0.218341	34.1106	0.0293158	1	0.343557	1	P49419;
1-pyrroline dehydrogenase activity	1	1	0.218341	34.1106	0.0293158	1	0.343557	1	P49189;
prostaglandin D2 11-ketoreductase activity	1	1	0.218341	34.1106	0.0293158	1	0.343557	1	P42330;
prostaglandin H2 endoperoxidase reductase activity	1	1	0.218341	34.1106	0.0293158	1	0.343557	1	P42330;
ketoreductase activity	1	1	0.218341	34.1106	0.0293158	1	0.343557	1	P42330;
intramolecular oxidoreductase activity	1	1	0.218341	34.1106	0.0293158	1	0.343557	1	P42126;
isovaleryl-CoA dehydrogenase activity	1	1	0.218341	34.1106	0.0293158	1	0.343557	1	P26440;
nucleoside deoxyribosyltransferase activity	1	1	0.218341	34.1106	0.0293158	1	0.343557	1	O43598;
long-chain-alcohol oxidase activity	1	1	0.218341	34.1106	0.0293158	1	0.343557	1	P51648;
uracil binding	1	1	0.218341	34.1106	0.0293158	1	0.343557	1	Q14117;
thymine binding	1	1	0.218341	34.1106	0.0293158	1	0.343557	1	Q14117;
RNA polymerase II C-terminal domain binding	1	1	0.218341	34.1106	0.0293158	1	0.343557	1	Q00839;
aldose 1-epimerase activity	1	1	0.218341	34.1106	0.0293158	1	0.343557	1	Q96C23;
succinate-semialdehyde dehydrogenase binding	1	1	0.218341	34.1106	0.0293158	1	0.343557	1	P80404;
S-nitrosoglutathione binding	1	1	0.218341	34.1106	0.0293158	1	0.343557	1	P09211;
glycine amidinotransferase activity	1	1	0.218341	34.1106	0.0293158	1	0.343557	1	P50440;
4-aminobutyrate:2-oxoglutarate transaminase activity	1	1	0.218341	34.1106	0.0293158	1	0.343557	1	P80404;
(S)-3-amino-2-methylpropionate transaminase activity	1	1	0.218341	34.1106	0.0293158	1	0.343557	1	P80404;
succinate-semialdehyde dehydrogenase [NAD(P)+] activity	1	1	0.218341	34.1106	0.0293158	1	0.343557	1	P51649;
4-aminobutyrate transaminase activity	1	1	0.218341	34.1106	0.0293158	1	0.343557	1	P80404;
structural constituent of postsynaptic actin cytoskeleton	1	1	0.218341	34.1106	0.0293158	1	0.343557	1	P60709;
sedoheptulose-7-phosphate:D-glyceraldehyde-3-phosphate glyceronetransferase activity	1	1	0.218341	34.1106	0.0293158	1	0.343557	1	P37837;
glycine N-benzoyltransferase activity	1	1	0.218341	34.1106	0.0293158	1	0.343557	1	Q6IB77;
methylenetetrahydrofolate dehydrogenase [NAD(P)+] activity	1	1	0.218341	34.1106	0.0293158	1	0.343557	1	P11586;
glutamine N-acyltransferase activity	1	1	0.218341	34.1106	0.0293158	1	0.343557	1	Q969I3;
glutathione oxidoreductase activity	1	1	0.218341	34.1106	0.0293158	1	0.343557	1	P35754;
glutathione-disulfide reductase activity	1	1	0.218341	34.1106	0.0293158	1	0.343557	1	P00390;
dinitrosyl-iron complex binding	1	1	0.218341	34.1106	0.0293158	1	0.343557	1	P09211;
glycerate dehydrogenase activity	1	1	0.218341	34.1106	0.0293158	1	0.343557	1	Q9UBQ7;
glutathione synthase activity	1	1	0.218341	34.1106	0.0293158	1	0.343557	1	P48637;
succinate-semialdehyde dehydrogenase (NAD+) activity	1	1	0.218341	34.1106	0.0293158	1	0.343557	1	P51649;
formimidoyltransferase activity	1	1	0.218341	34.1106	0.0293158	1	0.343557	1	O95954;
formimidoyltetrahydrofolate cyclodeaminase activity	1	1	0.218341	34.1106	0.0293158	1	0.343557	1	O95954;
fumarate hydratase activity	1	1	0.218341	34.1106	0.0293158	1	0.343557	1	P07954;
glutamate formimidoyltransferase activity	1	1	0.218341	34.1106	0.0293158	1	0.343557	1	O95954;
formaldehyde dehydrogenase activity	1	1	0.218341	34.1106	0.0293158	1	0.343557	1	P11766;
3-hydroxyisobutyryl-CoA hydrolase activity	1	1	0.218341	34.1106	0.0293158	1	0.343557	1	Q6NVY1;
poly(C) RNA binding	1	1	0.218341	34.1106	0.0293158	1	0.343557	1	Q00839;
S-(hydroxymethyl)glutathione dehydrogenase activity	1	1	0.218341	34.1106	0.0293158	1	0.343557	1	P11766;
homogentisate 1,2-dioxygenase activity	1	1	0.218341	34.1106	0.0293158	1	0.343557	1	Q93099;
glucose-6-phosphate isomerase activity	1	1	0.218341	34.1106	0.0293158	1	0.343557	1	P06744;
sarcosine oxidase activity	1	1	0.218341	34.1106	0.0293158	1	0.343557	1	Q9P0Z9;
intramolecular transferase activity	1	1	0.218341	34.1106	0.0293158	1	0.343557	1	P06744;
agmatinase activity	1	1	0.218341	34.1106	0.0293158	1	0.343557	1	Q9BSE5;
L-pipecolate oxidase activity	1	1	0.218341	34.1106	0.0293158	1	0.343557	1	Q9P0Z9;
peptidyl-cysteine S-nitrosylase activity	1	1	0.218341	34.1106	0.0293158	1	0.343557	1	P04406;
porphobilinogen synthase activity	1	1	0.218341	34.1106	0.0293158	1	0.343557	1	P13716;
3-hydroxy-2-methylbutyryl-CoA dehydrogenase activity	1	1	0.218341	34.1106	0.0293158	1	0.343557	1	Q99714;
cholate 7-alpha-dehydrogenase activity	1	1	0.218341	34.1106	0.0293158	1	0.343557	1	Q99714;
dihydrolipoyl dehydrogenase activity	1	1	0.218341	34.1106	0.0293158	1	0.343557	1	P09622;
RNA polymerase III regulatory region DNA binding	1	1	0.218341	34.1106	0.0293158	1	0.343557	1	P30044;
peroxynitrite reductase activity	1	1	0.218341	34.1106	0.0293158	1	0.343557	1	P30044;
dihydronicotinamide riboside quinone reductase activity	1	1	0.218341	34.1106	0.0293158	1	0.343557	1	P16083;
2-alkenal reductase [NAD(P)] activity	1	1	0.218341	34.1106	0.0293158	1	0.343557	1	Q14914;
alkyl hydroperoxide reductase activity	1	1	0.218341	34.1106	0.0293158	1	0.343557	1	P30048;
resveratrol binding	1	1	0.218341	34.1106	0.0293158	1	0.343557	1	P16083;
prostaglandin-E2 9-reductase activity	1	1	0.218341	34.1106	0.0293158	1	0.343557	1	P16152;
melatonin binding	1	1	0.218341	34.1106	0.0293158	1	0.343557	1	P16083;
oxidoreductase activity, acting on other nitrogenous compounds as donors	1	1	0.218341	34.1106	0.0293158	1	0.343557	1	P16083;
omega-amidase activity	1	1	0.218341	34.1106	0.0293158	1	0.343557	1	Q9NQR4;
choline dehydrogenase activity	1	1	0.218341	34.1106	0.0293158	1	0.343557	1	Q8NE62;
metal chelating activity	1	1	0.218341	34.1106	0.0293158	1	0.343557	1	P02649;
alanylglutamate dipeptidase activity	1	1	0.218341	34.1106	0.0293158	1	0.343557	1	Q96KP4;
citrate (Si)-synthase activity	1	1	0.218341	34.1106	0.0293158	1	0.343557	1	O75390;
nitric oxide transmembrane transporter activity	1	1	0.218341	34.1106	0.0293158	1	0.343557	1	P29972;
phenanthrene-9,10-epoxide hydrolase activity	1	1	0.218341	34.1106	0.0293158	1	0.343557	1	O43488;
argininosuccinate lyase activity	1	1	0.218341	34.1106	0.0293158	1	0.343557	1	P04424;
dopamine receptor binding	1	1	0.218341	34.1106	0.0293158	1	0.343557	1	O14745;
pyruvate carboxylase activity	1	1	0.218341	34.1106	0.0293158	1	0.343557	1	P11498;
S-methylmethionine-homocysteine S-methyltransferase activity	1	1	0.218341	34.1106	0.0293158	1	0.343557	1	Q9H2M3;
phosphoenolpyruvate carboxykinase activity	1	1	0.218341	34.1106	0.0293158	1	0.343557	1	Q16822;
proline dipeptidase activity	1	1	0.218341	34.1106	0.0293158	1	0.343557	1	P12955;
L-dopa decarboxylase activator activity	1	1	0.218341	34.1106	0.0293158	1	0.343557	1	Q99497;
betaine-homocysteine S-methyltransferase activity	1	1	0.218341	34.1106	0.0293158	1	0.343557	1	Q93088;
protein deglycase activity	1	1	0.218341	34.1106	0.0293158	1	0.343557	1	Q99497;
tyrosine 3-monooxygenase activator activity	1	1	0.218341	34.1106	0.0293158	1	0.343557	1	Q99497;
CoA carboxylase activity	1	1	0.218341	34.1106	0.0293158	1	0.343557	1	P05166;
mercury ion binding	1	1	0.218341	34.1106	0.0293158	1	0.343557	1	Q99497;
complement component C3a binding	1	1	0.218341	34.1106	0.0293158	1	0.343557	1	P35232;
purine-nucleoside phosphorylase activity	1	1	0.218341	34.1106	0.0293158	1	0.343557	1	P00491;
nicotinate phosphoribosyltransferase activity	1	1	0.218341	34.1106	0.0293158	1	0.343557	1	Q6XQN6;
15-hydroxyprostaglandin dehydrogenase (NADP+) activity	1	1	0.218341	34.1106	0.0293158	1	0.343557	1	P16152;
argininosuccinate synthase activity	1	1	0.218341	34.1106	0.0293158	1	0.343557	1	P00966;
oxoglutarate dehydrogenase (NAD+) activity	1	1	0.218341	34.1106	0.0293158	1	0.343557	1	Q02218;
gamma-butyrobetaine dioxygenase activity	1	1	0.218341	34.1106	0.0293158	1	0.343557	1	O75936;
riboflavin reductase (NADPH) activity	1	1	0.218341	34.1106	0.0293158	1	0.343557	1	P30043;
dihydrolipoyllysine-residue succinyltransferase activity	1	1	0.218341	34.1106	0.0293158	1	0.343557	1	P36957;
alpha-amino-acid esterase activity	1	1	0.218341	34.1106	0.0293158	1	0.343557	1	Q86WA6;
3alpha,7alpha,12alpha-trihydroxy-5beta-cholest-24-enoyl-CoA hydratase activity	1	1	0.218341	34.1106	0.0293158	1	0.343557	1	P51659;
17-beta-hydroxysteroid dehydrogenase (NAD+) activity	1	1	0.218341	34.1106	0.0293158	1	0.343557	1	P51659;
alcohol dehydrogenase [NAD(P)+] activity	1	1	0.218341	34.1106	0.0293158	1	0.343557	1	Q9BTZ2;
6,7-dihydropteridine reductase activity	1	1	0.218341	34.1106	0.0293158	1	0.343557	1	P09417;
L-dopa decarboxylase activity	1	1	0.218341	34.1106	0.0293158	1	0.343557	1	P20711;
dimethylglycine dehydrogenase activity	1	1	0.218341	34.1106	0.0293158	1	0.343557	1	Q9UI17;
oxoglutarate:malate antiporter activity	1	1	0.218341	34.1106	0.0293158	1	0.343557	1	Q02978;
aromatic-L-amino-acid decarboxylase activity	1	1	0.218341	34.1106	0.0293158	1	0.343557	1	P20711;
L-xylulose reductase (NADP+) activity	1	1	0.218341	34.1106	0.0293158	1	0.343557	1	Q7Z4W1;
D-xylulose reductase activity	1	1	0.218341	34.1106	0.0293158	1	0.343557	1	Q00796;
sphingolipid activator protein activity	1	1	0.218341	34.1106	0.0293158	1	0.343557	1	P17900;
beta-N-acetylgalactosaminidase activity	1	1	0.218341	34.1106	0.0293158	1	0.343557	1	P17900;
fructose-1-phosphate aldolase activity	1	1	0.218341	34.1106	0.0293158	1	0.343557	1	P05062;
ketohexokinase activity	1	1	0.218341	34.1106	0.0293158	1	0.343557	1	P50053;
L-iditol 2-dehydrogenase activity	1	1	0.218341	34.1106	0.0293158	1	0.343557	1	Q00796;
alpha-methylacyl-CoA racemase activity	1	1	0.218341	34.1106	0.0293158	1	0.343557	1	Q9UHK6;
calcium oxalate binding	1	1	0.218341	34.1106	0.0293158	1	0.343557	1	P02760;
adenyl nucleotide binding	1	1	0.218341	34.1106	0.0293158	1	0.343557	1	P23526;
adenosylhomocysteinase activity	1	1	0.218341	34.1106	0.0293158	1	0.343557	1	P23526;
malate dehydrogenase (NADP+) activity	1	1	0.218341	34.1106	0.0293158	1	0.343557	1	P40926;
amylase activity	1	1	0.218341	34.1106	0.0293158	1	0.343557	1	O43451;
deaminase activity	1	1	0.218341	34.1106	0.0293158	1	0.343557	1	P52758;
N-acylglucosamine 2-epimerase activity	1	1	0.218341	34.1106	0.0293158	1	0.343557	1	P51606;
malonate-semialdehyde dehydrogenase (acetylating) activity	1	1	0.218341	34.1106	0.0293158	1	0.343557	1	Q02252;
C5L2 anaphylatoxin chemotactic receptor binding	1	1	0.218341	34.1106	0.0293158	1	0.343557	1	P01024;
cytosolic dipeptidase activity	1	1	0.218341	34.1106	0.0293158	1	0.343557	1	Q96KP4;
methylmalonate-semialdehyde dehydrogenase (acylating) activity	1	1	0.218341	34.1106	0.0293158	1	0.343557	1	Q02252;
phosphate:proton symporter activity	1	1	0.218341	34.1106	0.0293158	1	0.343557	1	Q00325;
endoribonuclease activity, producing 3'-phosphomonoesters	1	1	0.218341	34.1106	0.0293158	1	0.343557	1	P52758;
bone sialoprotein binding	1	1	0.218341	34.1106	0.0293158	1	0.343557	1	P07355;
geranial:oxygen oxidoreductase activity	1	1	0.218341	34.1106	0.0293158	1	0.343557	1	Q06278;
thiomorpholine-carboxylate dehydrogenase activity	1	1	0.218341	34.1106	0.0293158	1	0.343557	1	Q14894;
oxidoreductase activity, acting on the CH-NH2 group of donors, NAD or NADP as acceptor	1	1	0.218341	34.1106	0.0293158	1	0.343557	1	Q14894;
heptaldehyde:oxygen oxidoreductase activity	1	1	0.218341	34.1106	0.0293158	1	0.343557	1	Q06278;
diiodophenylpyruvate reductase activity	1	1	0.218341	34.1106	0.0293158	1	0.343557	1	P40925;
platinum binding	1	1	0.218341	34.1106	0.0293158	1	0.343557	1	P52758;
L-gulonate 3-dehydrogenase activity	1	1	0.218341	34.1106	0.0293158	1	0.343557	1	Q9Y2S2;
xenon atom binding	1	1	0.218341	34.1106	0.0293158	1	0.343557	1	P52758;
FAD-AMP lyase (cyclizing) activity	1	1	0.218341	34.1106	0.0293158	1	0.343557	1	Q3LXA3;
3-hydroxyanthranilate 3,4-dioxygenase activity	1	1	0.218341	34.1106	0.0293158	1	0.343557	1	P46952;
tricarboxylic acid transmembrane transporter activity	1	1	0.218341	34.1106	0.0293158	1	0.343557	1	P53007;
3-mercaptopyruvate sulfurtransferase activity	1	1	0.218341	34.1106	0.0293158	1	0.343557	1	P25325;
mycophenolic acid acyl-glucuronide esterase activity	1	1	0.218341	34.1106	0.0293158	1	0.343557	1	Q9NUJ1;
3-hydroxyisobutyrate dehydrogenase activity	1	1	0.218341	34.1106	0.0293158	1	0.343557	1	P31937;
ferric iron transmembrane transporter activity	1	1	0.218341	34.1106	0.0293158	1	0.343557	1	P02787;
4-hydroxyglutamate transaminase activity	1	1	0.218341	34.1106	0.0293158	1	0.343557	1	P00505;
ligase activity, forming carbon-carbon bonds	1	1	0.218341	34.1106	0.0293158	1	0.343557	1	P24752;
triose-phosphate isomerase activity	1	1	0.218341	34.1106	0.0293158	1	0.343557	1	P60174;
L-cysteine:2-oxoglutarate aminotransferase activity	1	1	0.218341	34.1106	0.0293158	1	0.343557	1	P17174;
triokinase activity	1	1	0.218341	34.1106	0.0293158	1	0.343557	1	Q3LXA3;
acetate CoA-transferase activity	1	1	0.218341	34.1106	0.0293158	1	0.343557	1	P09110;
glycerone kinase activity	1	1	0.218341	34.1106	0.0293158	1	0.343557	1	Q3LXA3;
chromatin DNA binding	5	60	1.0917	2.84776	0.0309504	1	0.361678	1	O43707; P16403; P07305; P10412; Q00839;
sodium:potassium-exchanging ATPase activity	2	10	0.436681	6.84939	0.0330221	1	0.380451	1	P05026; P05023;
AMP binding	2	10	0.436681	6.84939	0.0330221	1	0.380451	1	P09467; P10412;
retinal binding	2	10	0.436681	6.84939	0.0330221	1	0.380451	1	P02753; P82980;
toxic substance binding	2	10	0.436681	6.84939	0.0330221	1	0.380451	1	P02768; P34913;
Tat protein binding	2	10	0.436681	6.84939	0.0330221	1	0.380451	1	P06748; P60709;
metallopeptidase activity	5	62	1.0917	2.75591	0.034993	1	0.402026	1	Q03154; Q96KP4; Q07075; P08473; P15144;
cysteine-type endopeptidase inhibitor activity involved in apoptotic process	3	26	0.655022	3.94744	0.0394936	1	0.448545	1	P30048; P16444; P30044;
5S rRNA binding	2	11	0.436681	6.22728	0.0395904	1	0.448545	1	P13639; Q16762;
dipeptidyl-peptidase activity	2	11	0.436681	6.22728	0.0395904	1	0.448545	1	P16444; P27487;
macromolecular complex binding	2	11	0.436681	6.22728	0.0395904	1	0.448545	1	P12956; Q00839;
ion transmembrane transporter activity	2	11	0.436681	6.22728	0.0395904	1	0.448545	1	P06703; Q96NB2;
misfolded protein binding	2	12	0.436681	5.70877	0.0466045	1	0.521	1	P11021; P10909;
adenylate cyclase binding	2	12	0.436681	5.70877	0.0466045	1	0.521	1	Q01518; P0DP25;
metalloexopeptidase activity	2	12	0.436681	5.70877	0.0466045	1	0.521	1	P28838; P16444;
protein membrane anchor	2	12	0.436681	5.70877	0.0466045	1	0.521	1	P02730; P35579;
integrin binding	7	112	1.52838	2.13477	0.0466225	1	0.521	1	P98160; P04004; P02461; O43707; P07237; Q9Y490; P27797;
kinase binding	6	91	1.31004	2.25255	0.0509444	1	0.554684	1	Q99497; P17858; P30048; P00338; P07195; P08238;
translation repressor activity, nucleic acid binding	2	13	0.436681	5.26997	0.0540327	1	0.554684	1	P34896; Q00577;
retinol binding	2	13	0.436681	5.26997	0.0540327	1	0.554684	1	P02753; P82980;
electron transporter, transferring electrons from CoQH2-cytochrome c reductase complex and cytochrome c oxidase complex activity	1	2	0.218341	17.1402	0.0577739	1	0.554684	1	P99999;
laminin receptor activity	1	2	0.218341	17.1402	0.0577739	1	0.554684	1	P08865;
nitric oxide binding	1	2	0.218341	17.1402	0.0577739	1	0.554684	1	P09211;
glycerol-3-phosphate dehydrogenase [NAD+] activity	1	2	0.218341	17.1402	0.0577739	1	0.554684	1	P21695;
dihydropyrimidinase activity	1	2	0.218341	17.1402	0.0577739	1	0.554684	1	Q14117;
glycerol-3-phosphate dehydrogenase activity	1	2	0.218341	17.1402	0.0577739	1	0.554684	1	P21695;
phosphatidylserine decarboxylase activity	1	2	0.218341	17.1402	0.0577739	1	0.554684	1	P17174;
carbon dioxide transmembrane transporter activity	1	2	0.218341	17.1402	0.0577739	1	0.554684	1	P29972;
glycerol transmembrane transporter activity	1	2	0.218341	17.1402	0.0577739	1	0.554684	1	P29972;
glucan 1,4-alpha-glucosidase activity	1	2	0.218341	17.1402	0.0577739	1	0.554684	1	O43451;
testosterone dehydrogenase [NAD(P)] activity	1	2	0.218341	17.1402	0.0577739	1	0.554684	1	Q99714;
sulfonylurea receptor binding	1	2	0.218341	17.1402	0.0577739	1	0.554684	1	P08238;
(R)-2-hydroxyglutarate dehydrogenase activity	1	2	0.218341	17.1402	0.0577739	1	0.554684	1	O75874;
biliverdin reductase activity	1	2	0.218341	17.1402	0.0577739	1	0.554684	1	P30043;
sequence-specific single stranded DNA binding	1	2	0.218341	17.1402	0.0577739	1	0.554684	1	Q15365;
glyceraldehyde-3-phosphate dehydrogenase (NAD+) (phosphorylating) activity	1	2	0.218341	17.1402	0.0577739	1	0.554684	1	P04406;
hydroxymethylglutaryl-CoA lyase activity	1	2	0.218341	17.1402	0.0577739	1	0.554684	1	P35914;
dimethylargininase activity	1	2	0.218341	17.1402	0.0577739	1	0.554684	1	O94760;
kinase regulator activity	1	2	0.218341	17.1402	0.0577739	1	0.554684	1	P09211;
Rab GDP-dissociation inhibitor activity	1	2	0.218341	17.1402	0.0577739	1	0.554684	1	P50395;
proline dehydrogenase activity	1	2	0.218341	17.1402	0.0577739	1	0.554684	1	Q9UF12;
CoA-ligase activity	1	2	0.218341	17.1402	0.0577739	1	0.554684	1	Q68CK6;
UTP binding	1	2	0.218341	17.1402	0.0577739	1	0.554684	1	P08238;
hydroxymethyl-, formyl- and related transferase activity	1	2	0.218341	17.1402	0.0577739	1	0.554684	1	O75891;
phosphoglycerate kinase activity	1	2	0.218341	17.1402	0.0577739	1	0.554684	1	P00558;
retinol transmembrane transporter activity	1	2	0.218341	17.1402	0.0577739	1	0.554684	1	P02753;
pyruvate dehydrogenase (NAD+) activity	1	2	0.218341	17.1402	0.0577739	1	0.554684	1	P08559;
protein tyrosine phosphatase activator activity	1	2	0.218341	17.1402	0.0577739	1	0.554684	1	Q15257;
methylarsonate reductase activity	1	2	0.218341	17.1402	0.0577739	1	0.554684	1	P78417;
glutathione disulfide oxidoreductase activity	1	2	0.218341	17.1402	0.0577739	1	0.554684	1	P35754;
glutathione dehydrogenase (ascorbate) activity	1	2	0.218341	17.1402	0.0577739	1	0.554684	1	P78417;
androsterone dehydrogenase activity	1	2	0.218341	17.1402	0.0577739	1	0.554684	1	P42330;
delta4-3-oxosteroid 5beta-reductase activity	1	2	0.218341	17.1402	0.0577739	1	0.554684	1	P42330;
oxidoreductase activity, acting on the aldehyde or oxo group of donors	1	2	0.218341	17.1402	0.0577739	1	0.554684	1	Q06278;
formate-tetrahydrofolate ligase activity	1	2	0.218341	17.1402	0.0577739	1	0.554684	1	P11586;
3-hydroxybutyrate dehydrogenase activity	1	2	0.218341	17.1402	0.0577739	1	0.554684	1	Q9BUT1;
molecular function regulator	1	2	0.218341	17.1402	0.0577739	1	0.554684	1	P07355;
geranylgeranyl reductase activity	1	2	0.218341	17.1402	0.0577739	1	0.554684	1	P42330;
aldehyde oxidase activity	1	2	0.218341	17.1402	0.0577739	1	0.554684	1	Q06278;
deubiquitinase activator activity	1	2	0.218341	17.1402	0.0577739	1	0.554684	1	P55072;
glutamate dehydrogenase [NAD(P)+] activity	1	2	0.218341	17.1402	0.0577739	1	0.554684	1	P00367;
glutamate dehydrogenase (NAD+) activity	1	2	0.218341	17.1402	0.0577739	1	0.554684	1	P00367;
prostaglandin-F synthase activity	1	2	0.218341	17.1402	0.0577739	1	0.554684	1	P42330;
iron-responsive element binding	1	2	0.218341	17.1402	0.0577739	1	0.554684	1	P21399;
oleic acid binding	1	2	0.218341	17.1402	0.0577739	1	0.554684	1	P05413;
purine nucleobase binding	1	2	0.218341	17.1402	0.0577739	1	0.554684	1	P00491;
hydro-lyase activity	1	2	0.218341	17.1402	0.0577739	1	0.554684	1	P00915;
2,4-dienoyl-CoA reductase (NADPH) activity	1	2	0.218341	17.1402	0.0577739	1	0.554684	1	Q16698;
nucleoside triphosphate adenylate kinase activity	1	2	0.218341	17.1402	0.0577739	1	0.554684	1	P27144;
phenylpyruvate tautomerase activity	1	2	0.218341	17.1402	0.0577739	1	0.554684	1	P14174;
formyltetrahydrofolate dehydrogenase activity	1	2	0.218341	17.1402	0.0577739	1	0.554684	1	O75891;
steroid hormone receptor binding	1	2	0.218341	17.1402	0.0577739	1	0.554684	1	P98164;
proteasome core complex binding	1	2	0.218341	17.1402	0.0577739	1	0.554684	1	P13716;
hydroxyacylglutathione hydrolase activity	1	2	0.218341	17.1402	0.0577739	1	0.554684	1	Q16775;
benzaldehyde dehydrogenase (NAD+) activity	1	2	0.218341	17.1402	0.0577739	1	0.554684	1	P00352;
carbon-carbon lyase activity	1	2	0.218341	17.1402	0.0577739	1	0.554684	1	P24752;
purine-rich negative regulatory element binding	1	2	0.218341	17.1402	0.0577739	1	0.554684	1	Q00577;
serine-type endopeptidase activity	12	246	2.62009	1.66525	0.0591521	1	0.566586	1	P01859; P07339; P01834; P01857; P00740; P01624; P53634; P01024; P27487; P0C0L5; P01615; P01619;
carbonate dehydratase activity	2	14	0.436681	4.89382	0.0618449	1	0.590994	1	P00918; P00915;
ion channel binding	7	120	1.52838	1.99246	0.0630558	1	0.601161	1	P62258; O43707; P27348; P21796; P0DP25; P08238; P63104;
virus receptor activity	5	75	1.0917	2.27829	0.0689824	1	0.656135	1	P11279; P0DMV9; P15144; P27487; P08865;
lyase activity	2	15	0.436681	4.56778	0.0700122	1	0.662847	1	Q9BVM4; P09429;
polysaccharide binding	2	15	0.436681	4.56778	0.0700122	1	0.662847	1	P04004; Q9UJW2;
cysteine-type endopeptidase inhibitor activity	3	33	0.655022	3.11036	0.0714469	1	0.674868	1	P02765; P04196; P01042;
GTPase binding	3	34	0.655022	3.01891	0.0767287	1	0.723089	1	Q01082; P06733; P07900;
peroxidase activity	2	16	0.436681	4.28247	0.0785072	1	0.727675	1	Q06830; P30044;
carboxypeptidase activity	2	16	0.436681	4.28247	0.0785072	1	0.727675	1	Q96KP4; Q9Y646;
apolipoprotein binding	2	16	0.436681	4.28247	0.0785072	1	0.727675	1	P10809; P27824;
cysteine-type endopeptidase activity	4	56	0.873362	2.44213	0.0814038	1	0.727675	1	P30101; P07339; P53634; Q9UJW2;
phosphoprotein binding	3	35	0.655022	2.93268	0.0821769	1	0.727675	1	P62258; Q14117; P31946;
indanol dehydrogenase activity	1	3	0.218341	11.4458	0.0853995	1	0.727675	1	P42330;
maltose alpha-glucosidase activity	1	3	0.218341	11.4458	0.0853995	1	0.727675	1	O43451;
ketosteroid monooxygenase activity	1	3	0.218341	11.4458	0.0853995	1	0.727675	1	P42330;
palmitoyl-CoA oxidase activity	1	3	0.218341	11.4458	0.0853995	1	0.727675	1	P09110;
glyoxylate reductase (NADP) activity	1	3	0.218341	11.4458	0.0853995	1	0.727675	1	Q9UBQ7;
phenanthrene 9,10-monooxygenase activity	1	3	0.218341	11.4458	0.0853995	1	0.727675	1	P42330;
glutaminase activity	1	3	0.218341	11.4458	0.0853995	1	0.727675	1	O94925;
NADH binding	1	3	0.218341	11.4458	0.0853995	1	0.727675	1	P09417;
interleukin-8 binding	1	3	0.218341	11.4458	0.0853995	1	0.727675	1	P01023;
tumor necrosis factor binding	1	3	0.218341	11.4458	0.0853995	1	0.727675	1	P01023;
hydroxypyruvate reductase activity	1	3	0.218341	11.4458	0.0853995	1	0.727675	1	Q9UBQ7;
scavenger receptor binding	1	3	0.218341	11.4458	0.0853995	1	0.727675	1	Q5T2W1;
oxoglutarate dehydrogenase (succinyl-transferring) activity	1	3	0.218341	11.4458	0.0853995	1	0.727675	1	Q02218;
amide binding	1	3	0.218341	11.4458	0.0853995	1	0.727675	1	Q99623;
phenylalanine 4-monooxygenase activity	1	3	0.218341	11.4458	0.0853995	1	0.727675	1	P00439;
serine binding	1	3	0.218341	11.4458	0.0853995	1	0.727675	1	P34896;
leukotriene-C4 synthase activity	1	3	0.218341	11.4458	0.0853995	1	0.727675	1	O14880;
methylenetetrahydrofolate dehydrogenase (NAD+) activity	1	3	0.218341	11.4458	0.0853995	1	0.727675	1	P11586;
medium-chain-acyl-CoA dehydrogenase activity	1	3	0.218341	11.4458	0.0853995	1	0.727675	1	P11310;
exopeptidase activity	1	3	0.218341	11.4458	0.0853995	1	0.727675	1	P08473;
superoxide dismutase copper chaperone activity	1	3	0.218341	11.4458	0.0853995	1	0.727675	1	Q99497;
protein kinase C inhibitor activity	1	3	0.218341	11.4458	0.0853995	1	0.727675	1	P04792;
sequence-specific double-stranded DNA binding	1	3	0.218341	11.4458	0.0853995	1	0.727675	1	Q00839;
15-oxoprostaglandin 13-oxidase activity	1	3	0.218341	11.4458	0.0853995	1	0.727675	1	Q14914;
aspartic-type endopeptidase inhibitor activity	1	3	0.218341	11.4458	0.0853995	1	0.727675	1	P04406;
13-prostaglandin reductase activity	1	3	0.218341	11.4458	0.0853995	1	0.727675	1	Q14914;
nitrate reductase activity	1	3	0.218341	11.4458	0.0853995	1	0.727675	1	Q969Z3;
catalase activity	1	3	0.218341	11.4458	0.0853995	1	0.727675	1	P04040;
potassium ion transmembrane transporter activity	1	3	0.218341	11.4458	0.0853995	1	0.727675	1	P29972;
proteinase activated receptor binding	1	3	0.218341	11.4458	0.0853995	1	0.727675	1	P35232;
IgA binding	1	3	0.218341	11.4458	0.0853995	1	0.727675	1	P02760;
phosphogluconate dehydrogenase (decarboxylating) activity	1	3	0.218341	11.4458	0.0853995	1	0.727675	1	P31937;
cupric ion binding	1	3	0.218341	11.4458	0.0853995	1	0.727675	1	Q99497;
fructose-6-phosphate binding	1	3	0.218341	11.4458	0.0853995	1	0.727675	1	P17858;
testosterone 17-beta-dehydrogenase (NADP+) activity	1	3	0.218341	11.4458	0.0853995	1	0.727675	1	P42330;
phosphoglycerate mutase activity	1	3	0.218341	11.4458	0.0853995	1	0.727675	1	P18669;
6-phosphofructokinase activity	1	3	0.218341	11.4458	0.0853995	1	0.727675	1	P17858;
transketolase activity	1	3	0.218341	11.4458	0.0853995	1	0.727675	1	P29401;
oxidoreductase activity, acting on the CH-CH group of donors, NAD or NADP as acceptor	1	3	0.218341	11.4458	0.0853995	1	0.727675	1	Q9BUT1;
immunoglobulin binding	1	3	0.218341	11.4458	0.0853995	1	0.727675	1	P04196;
dopachrome isomerase activity	1	3	0.218341	11.4458	0.0853995	1	0.727675	1	P14174;
calcium ion binding	27	697	5.8952	1.32183	0.0856311	1	0.728131	1	Q13813; O60494; P98160; P05937; P11021; P08133; P98164; O75309; P00740; P06396; P06702; P07355; P05109; O43707; P06703; P67936; P27824; P02743; P0DP25; P50995; P08758; P14625; P09525; P10412; Q86YZ3; P07911; P27797;
nucleosomal DNA binding	2	17	0.436681	4.03071	0.0873039	1	0.740815	1	Q71DI3; P07910;
mRNA 3'-UTR binding	4	58	0.873362	2.35793	0.0899527	1	0.761711	1	P22626; P07910; Q00839; Q08257;
GDP binding	4	59	0.873362	2.31797	0.0943824	1	0.797455	1	P35558; Q96I99; P62826; Q15907;
protein N-terminus binding	6	107	1.31004	1.91575	0.0945637	1	0.797455	1	P0DMV9; P07585; O43707; P27348; P35754; Q99623;
cadherin binding involved in cell-cell adhesion	2	18	0.436681	3.80691	0.0963772	1	0.80941	1	P05783; P07355;
cofactor binding	2	18	0.436681	3.80691	0.0963772	1	0.80941	1	P29401; P53597;
nucleotide binding	4	61	0.873362	2.24199	0.103543	1	0.86272	1	P45880; P53597; Q9UJW2; P07900;
peptidyl-prolyl cis-trans isomerase activity	3	39	0.655022	2.63197	0.105535	1	0.86272	1	P23284; Q15257; P62937;
phosphatidylserine binding	3	39	0.655022	2.63197	0.105535	1	0.86272	1	P09429; P11142; Q9Y490;
transition metal ion binding	2	19	0.436681	3.60665	0.105704	1	0.86272	1	P52758; Q86YZ3;
oxygen binding	3	40	0.655022	2.56618	0.11174	1	0.86272	1	P02042; P68871; P69905;
apolipoprotein A-I binding	1	4	0.218341	8.59146	0.112217	1	0.86272	1	P10809;
alanine-glyoxylate transaminase activity	1	4	0.218341	8.59146	0.112217	1	0.86272	1	Q9BYV1;

## Sheet: Cellular component
Dataset: common to all SDS Buffers
Enrichment analysis: Cellular component
Number of proteins in the dataset: 468
Number of proteins in the dataset (which are available in Cellular component database) :468
Number of proteins in background: 18284
						Corrected p-values
Cellular component	No. of genes in the dataset	No.of genes in the background dataset	Percentage of proteins	Fold enrichment	P-value (Hypergeometric test)	Bonferroni method	BH method	Q-value (Storey-Tibshirani method)	Mapped gene names
extracellular exosome	377	2767	80.5556	5.32302	9.87579e-227	1.59099e-223	1.59099e-223	8.42003e-223	P30101; P28072; P05155; P13639; Q6NVY1; P50990; Q01082; P01008; P08123; Q13813; P22626; Q15365; P01876; P40926; P02792; P01023; P00403; P30084; O75947; P00441; O60494; P62258; P17174; O75390; P16930; Q9H2U2; P51888; P11279; Q01518; P55084; P42765; P02748; P32754; Q06830; O75891; P29401; P35558; O43895; P02765; Q5T2W1; Q93088; P61626; O00483; P51606; P00505; P98160; P05026; P07954; P08195; P04217;…
mitochondrion	152	1284	32.4786	4.62509	5.7979e-62	9.34041e-59	4.67021e-59	2.47162e-58	P40926; P00403; P30084; O75947; Q08426; P00441; O75306; P62258; Q6YN16; P31040; O75390; P55084; P42765; Q06830; O75891; P42704; O00483; P00505; P07954; Q96I99; O75874; P80404; P08559; P25705; Q02978; P11021; Q68CK6; P10809; P27144; Q9UF12; P08133; P11498; P21912; P30042; Q99497; Q9P2R7; Q14894; Q969Z3; Q96DC8; P56134; P36543; P25325; P42126; P13647; Q9UHK6; P11586; P45880; P04040; P13804; P09417;…
myelin sheath	62	147	13.2479	16.479	9.64184e-60	1.5533e-56	5.17767e-57	2.74019e-56	P30101; P40926; O75947; P00441; P31040; Q06830; P29401; P00505; P05026; P08559; P25705; P11021; P10809; P55072; Q9P2R7; P00918; P20674; P45880; P63261; P00966; P12235; Q16891; P30048; P12277; P14174; P38606; P68363; P06396; P49368; P26038; P14618; Q00325; P11142; P02511; P21796; P27824; P40925; P22695; P05141; P35232; P49411; P05023; P36542; O75489; P21281; P28331; P02768; P07195; P60709; P09622;…
mitochondrial matrix	74	353	15.812	8.19068	2.63901e-46	4.25144e-43	1.06286e-43	5.62499e-43	Q6NVY1; P40926; P30084; P00441; O75306; O75390; Q9H2U2; P42765; P00505; P07954; Q96I99; P80404; P08559; P25705; Q16775; Q68CK6; P10809; P38117; P27144; P11498; Q99497; Q9P2R7; P42126; P52758; P13804; Q9UI17; Q16698; P53597; P30048; P11310; Q9NUJ1; Q96CM8; P05166; Q16762; Q9BYV1; Q99714; P30038; P30837; P35914; P61604; P04179; Q08AH3; P51649; P05091; Q16822; Q86XE5; P30044; P00367; Q02252; P36542;…
extracellular matrix	63	269	13.4615	9.15076	1.66045e-42	2.67498e-39	5.34996e-40	2.83137e-39	P13639; P08123; P00441; P02452; P51888; Q06830; P02765; P98160; P04217; P04004; Q00610; P25705; P11021; P10809; P04792; P02760; P02461; P12109; P63261; P39060; P08670; P07585; P06702; P10909; P07355; P02763; P14618; P08572; P40939; P12236; P02647; P11142; P06727; P62826; P27824; P05141; P12111; P07437; P02743; P23528; P62277; P25311; P07237; P48047; P02462; P38646; P06576; P23246; P01042; P04264;…
blood microparticle	50	175	10.6838	11.1638	2.06237e-38	3.32248e-35	5.53746e-36	2.9306e-35	P05155; P01008; P01876; P01023; P02748; P02042; P02765; P04217; P04004; P02760; P01859; P63261; P07737; P01834; P0DMV9; P01857; P06396; P02787; P10909; Q14624; P02679; P02763; P01624; P04196; P26038; P02675; P02647; P11142; P01011; P06727; P01024; P02743; P02768; P0DOY3; P60709; P02730; P01042; P04264; P63104; P02649; P02671; P0C0L5; P02652; P01615; P01619; P68871; P02790; P00738; P19652; P69905;
mitochondrial inner membrane	62	433	13.2479	5.59474	7.60332e-29	1.2249e-25	1.74985e-26	9.26077e-26	P40926; P00403; O75947; P31040; P55084; P42765; O00483; P00505; P14854; P25705; Q02978; P10809; Q8NE62; Q9UF12; P21912; Q969Z3; P56134; P53007; P42126; P20674; P45880; P12235; Q16891; P53597; Q56VL3; Q16762; Q9NX63; Q5VTU8; Q00325; P35914; P40939; P12236; P99999; P10606; P50440; P13073; P21796; P22695; P05141; P35232; P49411; P09669; P56385; P36542; Q96NB2; P48047; P30049; Q16836; P24752; P54819;…
cytosol	229	4833	48.9316	1.8512	5.19461e-26	8.36852e-23	1.04607e-23	5.53612e-23	P28072; P13639; P50990; Q01082; P00325; Q13813; Q15365; P02792; P01023; O75947; Q08426; P00441; O60494; P62258; P17174; P16930; P11279; P02748; P32754; Q06830; O75891; P02042; Q07020; P29401; P35558; Q93088; P51606; Q9BRL6; P08195; P48637; Q00610; P13646; P05937; P12956; O75874; O43175; P36871; P60174; Q9Y2S2; P48668; P37802; P62987; Q16775; P10809; P18206; P38117; P05783; P11498; P55072; P02753;…
secretory granule lumen	32	116	6.83761	10.7797	2.1696e-24	3.49522e-21	3.88358e-22	2.05532e-21	P13639; P50990; P02765; P04217; P12956; O75874; P18206; P55072; P04040; P17858; P14174; P06396; P02787; P06702; P13716; P18669; P05109; P14618; P09429; P02647; P11142; P01011; P01024; P04075; P09211; P08238; P06744; P62937; P00491; Q14019; P07900; P50395;
extracellular region	123	1836	26.2821	2.61747	2.71086e-24	4.36719e-21	3.98575e-22	2.10939e-21	P05155; P13639; P50990; P01008; P08123; Q13813; P01876; P02792; P01023; P00441; P02452; P51888; Q01518; P02748; O43895; P02765; P61626; P98160; P04217; P04004; P12956; O75874; P36871; P37802; P01266; P18206; P55072; P02753; P02760; P02461; Q71DI3; P01859; P12109; P04040; P07339; P07910; P17858; P01834; P39060; P0DMV9; P01857; P14174; P07585; Q9H8H3; P00740; P06396; P02787; P06702; P10909; P07355;…
extracellular space	104	1377	22.2222	2.9509	2.72149e-24	4.38433e-21	3.98575e-22	2.10939e-21	P30101; P05155; P01008; P08123; P01876; P00441; P02452; P51888; P02748; Q06830; P02765; P61626; P98160; P04217; P04004; P60174; P62987; P10809; P01266; P02753; P04792; P02760; P35527; P02461; P01859; Q13228; P63261; P07339; P00558; P01834; P39060; P12277; P01857; P14174; P07585; P00740; P06733; P06396; P02787; P06702; P10909; P07355; Q16762; P02679; P02763; Q16778; P05109; P26038; P02675; P09429;…
ficolin-1-rich granule lumen	31	124	6.62393	9.76925	2.97713e-22	4.79616e-19	3.9968e-20	2.11523e-19	P13639; P50990; P04217; P12956; O75874; P36871; P18206; P55072; P04040; P07339; P17858; P0DMV9; P14174; P06396; P13716; P18669; P14618; P09429; P11142; P02794; P04075; P01009; P09211; P04264; P08238; P06744; P62937; P00491; Q14019; P68871; P07900;
melanosome	27	101	5.76923	10.4466	2.27397e-20	3.66337e-17	2.81798e-18	1.49137e-17	P30101; P62258; P11279; Q06830; P08195; Q00610; P11021; P08133; P50991; P07339; P07355; P23284; Q16563; P11142; P62826; P27824; P31946; P05023; P50995; P21281; P07237; P23526; P08238; P63104; P14625; Q15084; P07900;
focal adhesion	44	387	9.40171	4.44268	9.07011e-17	1.46119e-13	1.04371e-14	5.52365e-14	P30101; P62258; Q01518; Q07020; P98160; Q00610; P11021; P18206; P08133; P04792; P04040; P63261; P07737; P0DMV9; P08670; P06748; P28838; P06396; P23284; P26038; P08473; P11142; O43707; P27348; P21291; P67936; P31946; P23528; P62277; P07237; P60709; P38646; P08758; P63104; P15311; P14625; P27487; P62937; P61978; P62917; Q9Y490; P35579; P27797; P50395;
membrane	103	1919	22.0085	2.0971	1.58628e-13	2.55549e-10	1.70366e-11	9.01632e-11	P13639; Q13813; P22626; Q15365; P02792; P00403; O60494; P62258; Q6YN16; P11279; Q07020; P42704; O43895; P05026; P08195; Q00610; P12956; P25705; P11021; P10809; P08133; P35527; P12109; P26641; P13647; P11586; Q13228; P04040; P63261; P00558; P07737; Q16891; P07910; P17858; P06748; Q9H8H3; O14745; P06733; P00338; P07355; P23284; P49721; P18669; O14880; P00167; Q00325; P61604; P11142; P47755; P27348;…
platelet alpha granule lumen	17	67	3.63248	9.91702	6.76513e-13	1.08986e-09	6.81164e-11	3.60494e-10	P05155; P01023; P02765; P04217; P10909; P02679; P02763; P04196; P02675; O43707; P01011; P04075; P02768; P01009; P01042; P02671; P19652;
peroxisome	20	101	4.2735	7.73925	9.6121e-13	1.54851e-09	9.10888e-11	4.82071e-10	Q08426; P00441; Q6YN16; P29401; O75874; Q969Z3; P52758; Q9UHK6; P04040; P08670; Q9P0Z9; P35914; P30044; P51659; P48735; P34913; Q13011; Q9BTZ2; P51648; P09110;
azurophil granule lumen	19	90	4.05983	8.25102	1.06509e-12	1.71586e-09	9.53257e-11	5.04495e-10	P50990; P02792; Q01518; P61626; P55072; P07355; P02766; P01011; Q6XQN6; P53634; P01024; P07437; P30041; P17900; Q86YZ3; P59666; P19652; P68371; P50395;
endoplasmic reticulum lumen	31	290	6.62393	4.17739	1.86955e-11	3.01185e-08	1.53722e-09	8.13544e-09	P30101; P01008; P08123; P02452; P02765; P11021; P02461; P12109; P39060; P00740; P02787; P23284; P02679; P08572; P02647; P06727; P53634; P01024; P27824; P12111; P02768; P07237; P01009; P02462; P01042; P02649; P02671; P14625; P02652; P27797; Q15084;
endocytic vesicle lumen	9	15	1.92308	23.4509	1.9084e-11	3.07443e-08	1.53722e-09	8.13544e-09	P02647; P02649; P14625; P68871; P02790; P00738; P27797; P69905; P07900;
extracellular vesicle	14	53	2.99145	10.3252	4.12344e-11	6.64287e-08	3.16327e-09	1.6741e-08	Q13813; P51888; P05026; Q00610; P18206; P16152; P02675; P14618; P02647; P12111; P05023; P02649; P02671; P68371;
mitochondrial proton-transporting ATP synthase complex	9	19	1.92308	18.5165	3.21493e-10	5.17925e-07	2.3542e-08	1.24592e-07	O75947; P25705; P56134; P56385; P36542; P48047; P30049; P06576; P24539;
mitochondrial nucleoid	11	43	2.35043	10.0008	7.54938e-09	1.2162e-05	5.28785e-07	2.7985e-06	P55084; P42704; P45880; P40939; P21796; P05141; P49411; P38646; P06576; P49748; P34897;
vesicle	18	133	3.84615	5.28988	8.48894e-09	1.36757e-05	5.6982e-07	3.01567e-06	P29401; P37802; P62987; P0DMV9; P14174; O14745; P02787; P07355; P26038; P14618; P23528; P60709; P09211; P63104; P15311; P62937; P04406; P50395;
tertiary granule lumen	12	55	2.5641	8.52938	1.11112e-08	1.79001e-05	7.16006e-07	3.78933e-06	Q13813; P61626; O75874; P36871; P07339; Q9H8H3; P02763; P02794; P04075; Q9NQR4; P68871; P00738;
peroxisomal matrix	11	45	2.35043	9.55641	1.2721e-08	2.04935e-05	7.8821e-07	4.17146e-06	Q08426; O75874; Q14894; Q9UHK6; P04040; Q9P0Z9; Q9UBQ7; P30044; P51659; P07148; P09110;
protein complex	38	553	8.11966	2.68523	3.59034e-08	5.78404e-05	2.14224e-06	1.13374e-05	Q01082; P00441; P00505; Q00610; P12956; P11021; P10809; P18206; P55072; P02753; P12109; P07910; P30048; P0DMV9; P06748; P18827; P10909; O43707; P27348; P02766; Q01105; P62826; P01024; P27824; P31946; P07437; P0DP25; P05023; P02768; P60709; P08238; P15311; P14625; Q99623; P07148; P62805; P35579; P07900;
mitochondrial respiratory chain complex IV	6	16	1.28205	14.6656	1.75392e-06	0.00282556	0.000100913	0.000534064	P00403; O00483; P20674; P10606; P13073; P22695;
endoplasmic reticulum chaperone complex	5	10	1.06838	19.5533	2.43741e-06	0.00392667	0.000135402	0.000716594	P11021; P23284; P07237; P14625; Q15084;
brush border	9	53	1.92308	6.64023	7.11765e-06	0.0114665	0.000382218	0.00202282	P18206; Q7Z4W1; Q07075; P08473; P47755; O43707; P15311; P35579; P29972;
cortical cytoskeleton	6	21	1.28205	11.1754	1.06581e-05	0.0171702	0.000553877	0.00293129	P47755; O43707; P67936; P60709; P02730; P15311;
microvillus	9	57	1.92308	6.17433	1.31978e-05	0.0212616	0.000664426	0.00351636	Q7Z4W1; P36543; P00918; O14745; P38606; P26038; P21281; Q9Y696; P15311;
sarcolemma	11	88	2.35043	4.88733	1.49036e-05	0.0240097	0.000727565	0.00385051	P11279; P05026; P18206; P12109; P05787; P07355; P12111; P05023; P08727; P21810; P29972;
intracellular ribonucleoprotein complex	13	123	2.77778	4.13193	1.6289e-05	0.0262416	0.00074576	0.0039468	P13639; P22626; P42704; P51991; Q14103; P0DMV9; P08670; P06748; P11142; O43707; P60709; P04406; Q00839;
collagen type VI trimer	3	3	0.641026	39.0676	1.6665e-05	0.0268474	0.00074576	0.0039468	P12109; P07585; P12111;
haptoglobin-hemoglobin complex	3	3	0.641026	39.0676	1.6665e-05	0.0268474	0.00074576	0.0039468	P68871; P00738; P69905;
apical plasma membrane	21	292	4.48718	2.8109	2.21118e-05	0.0356222	0.000962761	0.00509524	O60494; Q5T2W1; P05026; P08195; P36543; Q8TF72; O43451; P98164; O14745; P38606; P02787; Q07075; P26038; P16444; P05023; P08238; P15311; P14550; P27487; P07911; P29972;
mitochondrial intermembrane space	10	76	2.13675	5.14493	2.30882e-05	0.037195	0.000978816	0.00518021	P00441; P14854; Q99497; P04040; P99999; P50440; P28331; P54819; O95831; P34897;
lysosomal lumen	11	93	2.35043	4.6246	2.53113e-05	0.0407765	0.00104555	0.0055334	O60494; P51888; P98160; P07339; P07585; P18827; P11142; P51884; P21810; P17900; P07900;
specific granule lumen	9	62	1.92308	5.67648	2.65771e-05	0.0428158	0.00107039	0.00566487	Q13813; P61626; P18206; P07339; P02763; Q9NQR4; P00738; P09110; P19652;
cell periphery	7	36	1.49573	7.60521	3.01939e-05	0.0486424	0.0011864	0.00627881	P05783; O14745; P26038; P02533; P08727; P15311; Q99623;
intermediate filament	11	100	2.35043	4.30091	5.00888e-05	0.0806931	0.00192126	0.0101679	P48668; P05783; P35527; P13647; P05787; P08670; P13645; P02533; P08727; P35908; P02545;
mitochondrial proton-transporting ATP synthase complex, catalytic core F(1)	3	4	0.641026	29.325	6.53885e-05	0.105341	0.00244979	0.0129651	Q5VTU8; P36542; P30049;
nucleosome	8	61	1.7094	5.12918	0.000155488	0.25049	0.00569296	0.030129	Q5SSJ5; Q71DI3; Q71UI9; Q99879; Q16778; P16403; P07305; P62805;
oxoglutarate dehydrogenase complex	3	5	0.641026	23.4717	0.000160356	0.258334	0.00574076	0.030382	P09622; P36957; Q02218;
cell surface	31	606	6.62393	1.99912	0.000214316	0.345262	0.0075057	0.0397226	P30101; P00505; P08195; P11021; P10809; P02760; P14174; P18827; P06733; P02787; P10909; P07355; P02679; P04196; P26038; P02675; P09429; P02647; P02511; P35232; Q9Y696; P06576; P08238; P02671; P27487; P21810; Q99623; Q9Y490; P09525; P27797; Q00839;
microvillus membrane	5	23	1.06838	8.50624	0.000247079	0.398045	0.00846254	0.0447865	Q5T2W1; O14745; P26038; P16444; P15311;
chylomicron	4	13	0.854701	12.0416	0.000252143	0.406202	0.00846254	0.0447865	P02647; P06727; P02649; P02652;
Golgi lumen	10	101	2.13675	3.87156	0.00026325	0.424096	0.00865503	0.0458052	P51888; P98160; P04004; P07585; P00740; P18827; P51884; P21810; P07911; P59666;
cytoskeleton	21	351	4.48718	2.33842	0.000298941	0.481594	0.00963188	0.050975	P42704; P18206; P04792; Q8TF72; P63261; P07737; P08670; P06702; P47756; P49368; P05109; P26038; P67936; P07437; P60709; P06753; P04264; Q9Y490; P00491; Q14019; P68371;
pyruvate dehydrogenase complex	3	6	0.641026	19.5663	0.00031461	0.506837	0.00993798	0.052595	P08559; P09622; P11177;
external side of plasma membrane	16	234	3.4188	2.67284	0.000364291	0.586873	0.011286	0.0597293	P01876; P11279; P01859; P98164; P01834; P01857; P18827; P02679; Q07075; P02675; P15144; P07237; P08758; P02671; P00390; P27797;
membrane raft	15	214	3.20513	2.74008	0.000424704	0.684198	0.0129094	0.0683207	P13639; Q5T2W1; P18206; Q99497; P45880; P07339; P00558; O14745; P68363; P07355; P21796; P05141; P07437; P07195; P27487;
actin cytoskeleton	14	196	2.99145	2.79239	0.00054227	0.873597	0.0161777	0.0856178	P36871; P60981; P07910; O14745; P06396; P47756; P47755; P04075; Q9Y696; P60709; P06753; P15311; P07305; P35579;
intracellular ferritin complex	2	2	0.42735	39.0676	0.000653799	1	0.0181598	0.0961076	P02792; P02794;
mitotic spindle microtubule	2	2	0.42735	39.0676	0.000653799	1	0.0181598	0.0961076	Q00610; Q00839;
proton-transporting ATP synthase complex	2	2	0.42735	39.0676	0.000653799	1	0.0181598	0.0961076	P25705; P06576;
collagen type I trimer	2	2	0.42735	39.0676	0.000653799	1	0.0181598	0.0961076	P08123; P02452;
fibrinogen complex	3	8	0.641026	14.6808	0.000847764	1	0.0227625	0.120466	P02679; P02675; P02671;
spherical high-density lipoprotein particle	3	8	0.641026	14.6808	0.000847764	1	0.0227625	0.120466	P10909; P02647; P02652;
perinuclear region of cytoplasm	30	642	6.41026	1.82617	0.00117414	1	0.0310087	0.164108	P11279; P42704; P05783; P08133; P55072; Q99497; P0DMV9; O14745; P06396; P02787; P10909; P07355; P23284; P26038; O43707; P06703; Q01105; P31946; P30044; Q9Y696; P30041; P15311; P14625; O95831; P05090; P09525; P02545; Q86YZ3; P27797; P04406;
zona pellucida receptor complex	3	9	0.641026	13.0514	0.00124754	1	0.0319014	0.168832	P50990; P50991; P49368;
autolysosome	3	9	0.641026	13.0514	0.00124754	1	0.0319014	0.168832	P02792; P11279; P02794;
cell body	7	65	1.49573	4.21264	0.00133109	1	0.0335061	0.177325	P50990; Q99497; P50991; P49368; P07437; P15311; O00264;
very-low-density lipoprotein particle	4	20	0.854701	7.82913	0.00148218	1	0.0367353	0.194415	P02647; P06727; P02649; P02652;
apical part of cell	7	67	1.49573	4.08691	0.00159165	1	0.0388507	0.20561	P00918; Q07075; P26038; P16444; Q9Y696; P15311; P29972;
ruffle	8	87	1.7094	3.5965	0.00173175	1	0.041423	0.219224	O14745; P06396; P07355; P06703; P21281; P15311; Q9Y490; P35579;
mitochondrial proton-transporting ATP synthase complex, coupling factor F(o)	3	10	0.641026	11.7476	0.00174846	1	0.041423	0.219224	P56134; P56385; P24539;
brush border membrane	6	51	1.28205	4.60294	0.00184964	1	0.043185	0.228549	O60494; Q5T2W1; P98164; O14745; P08238; P29972;
discoidal high-density lipoprotein particle	2	3	0.42735	26.0883	0.00192807	1	0.0443731	0.234837	P02647; P02649;
mitochondrial membrane	8	89	1.7094	3.51569	0.00200254	1	0.0454378	0.240472	P21912; P11310; P10909; O75489; P06576; Q00796; P49748; Q02218;
uropod	3	11	0.641026	10.6806	0.00235867	1	0.0520524	0.275478	P26038; P15311; P35579;
hemoglobin complex	3	11	0.641026	10.6806	0.00235867	1	0.0520524	0.275478	P02042; P68871; P69905;
phagocytic vesicle	6	56	1.28205	4.19204	0.00299592	1	0.0631624	0.334276	P30101; P63261; P08670; P06396; P50995; Q15907;
high-density lipoprotein particle	4	24	0.854701	6.52482	0.00299831	1	0.0631624	0.334276	P02647; P06727; P02649; P02652;
smooth endoplasmic reticulum	4	24	0.854701	6.52482	0.00299831	1	0.0631624	0.334276	P11021; P23284; P27824; P27797;
keratin filament	8	95	1.7094	3.29367	0.00301894	1	0.0631624	0.334276	P13646; P48668; P05783; P13647; P05787; P02533; P04264; P35908;
chaperonin-containing T-complex	3	12	0.641026	9.79129	0.00308551	1	0.0637277	0.337268	P50990; P50991; P49368;
terminal web	2	4	0.42735	19.5825	0.00379074	1	0.0744742	0.394142	P18206; P08727;
muscle thin filament tropomyosin	2	4	0.42735	19.5825	0.00379074	1	0.0744742	0.394142	P67936; P06753;
secretory IgA immunoglobulin complex	2	4	0.42735	19.5825	0.00379074	1	0.0744742	0.394142	P01876; P01619;
monomeric IgA immunoglobulin complex	2	4	0.42735	19.5825	0.00379074	1	0.0744742	0.394142	P01876; P01619;
platelet alpha granule	3	15	0.641026	7.83433	0.00602761	1	0.116451	0.616297	P02679; P02675; P02671;
proton-transporting two-sector ATPase complex	2	5	0.42735	15.6738	0.006211	1	0.116451	0.616297	P36543; P38606;
mitochondrial respiratory chain complex II, succinate dehydrogenase complex (ubiquinone)	2	5	0.42735	15.6738	0.006211	1	0.116451	0.616297	P31040; P21912;
mitochondrial respiratory chain complex I	5	46	1.06838	4.25404	0.00621651	1	0.116451	0.616297	O75306; O00483; O75489; P28331; P19404;
endoplasmic reticulum-Golgi intermediate compartment	6	66	1.28205	3.55698	0.00677296	1	0.125417	0.663745	P11021; O95954; P09429; P15144; P07237; Q15084;
endocytic vesicle	5	48	1.06838	4.07683	0.00744948	1	0.136376	0.721747	O60494; P98164; P02787; P02647; P27487;
podosome	4	31	0.854701	5.05195	0.00771289	1	0.136544	0.722633	P18206; P06396; P67936; P61978;
M band	4	31	0.854701	5.05195	0.00771289	1	0.136544	0.722633	Q01082; P06733; P02511; P04075;
cortical actin cytoskeleton	4	31	0.854701	5.05195	0.00771289	1	0.136544	0.722633	Q01518; P60981; P06396; P23528;
microtubule cytoskeleton	9	135	1.92308	2.6072	0.00798613	1	0.139844	0.7401	Q13813; P68363; P02511; P07437; P68366; Q9BVA1; P34897; P04406; P68371;
basolateral plasma membrane	11	185	2.35043	2.32492	0.00824952	1	0.142903	0.756289	P05026; P00918; O75309; P07355; P26038; P05023; P02730; P08238; P15311; P07911; P29972;
nucleus	154	5095	32.906	1.18092	0.0086633	1	0.148474	0.785773	P30101; P28072; P13639; P22626; P40926; P00441; P62258; P17174; O75390; Q06830; Q07020; Q5SSJ5; P42704; Q9BRL6; P51991; P08195; P13646; P05937; P12956; P60174; P08559; Q02978; P62987; P11021; P55072; P42330; Q99497; Q7Z4W1; P04792; Q14894; P56134; P53007; P35527; Q71DI3; P52758; P26641; Q14103; P13647; P45880; P63261; P05787; Q16698; P34896; P12235; Q71UI9; P07737; P07910; P0DMV9; P12277; P11310;…
intermediate-density lipoprotein particle	2	6	0.42735	13.0659	0.0091592	1	0.150566	0.796844	P02647; P02649;
dense body	2	6	0.42735	13.0659	0.0091592	1	0.150566	0.796844	P63261; P60709;
proton-transporting V-type ATPase, V1 domain	2	6	0.42735	13.0659	0.0091592	1	0.150566	0.796844	P38606; P21281;
collagen type IV trimer	2	6	0.42735	13.0659	0.0091592	1	0.150566	0.796844	P08572; P02462;
mitochondrial outer membrane	10	163	2.13675	2.39903	0.0093493	1	0.152139	0.805167	P55084; P62987; Q969Z3; P45880; P00167; P21796; Q86WA6; P27338; Q99623; P33121;
actin filament	5	51	1.06838	3.83706	0.0096034	1	0.154711	0.818779	P63261; P47756; P67936; P06753; P15311;
lysosomal membrane	15	301	3.20513	1.94812	0.0110658	1	0.176505	0.934122	O60494; P11279; P62987; P08133; P36543; P12109; P98164; P38606; P07355; Q07075; P11142; P15144; P21281; P08238; P27487;
costamere	3	19	0.641026	6.18587	0.011901	1	0.187966	0.994779	P18206; P05787; P08727;
basement membrane	6	75	1.28205	3.1302	0.0124006	1	0.188052	0.995232	P98160; P04004; P39060; P07355; P02462; Q9UJW2;
extrinsic component of external side of plasma membrane	2	7	0.42735	11.202	0.0126068	1	0.188052	0.995232	O60494; P02787;
macromolecular complex	2	7	0.42735	11.202	0.0126068	1	0.188052	0.995232	P23284; Q00839;
apical cortex	2	7	0.42735	11.202	0.0126068	1	0.188052	0.995232	P07148; P17900;
MICOS complex	2	7	0.42735	11.202	0.0126068	1	0.188052	0.995232	Q16891; Q9NX63;
smooth endoplasmic reticulum membrane	2	7	0.42735	11.202	0.0126068	1	0.188052	0.995232	O95954; O00264;
peroxisomal membrane	5	55	1.06838	3.55805	0.0130927	1	0.193508	1	P04040; P51659; Q9BTZ2; P51648; P33121;
proteasome core complex	3	20	0.641026	5.87673	0.0137397	1	0.201224	1	P28072; P13716; P49721;
proteasome complex	5	56	1.06838	3.49453	0.0140826	1	0.202601	1	P28072; P55072; P04792; P49721; Q9UL46;
cytoplasm	124	4052	26.4957	1.19565	0.0140852	1	0.202601	1	P13639; P50990; Q01082; P22626; Q15365; P00441; P62258; P17174; P11279; Q06830; Q01995; P35558; P07954; O75874; P36871; Q16775; P10809; P05783; P11498; P55072; P42330; Q99497; Q14914; P04792; O14732; Q14894; P00918; Q8TF72; P52758; P26641; P13647; P30613; Q9UHK6; P11586; P32119; P05787; P09417; P00966; P07737; P30048; P0DMV9; P08670; P07585; P06748; P21266; O14745; P06733; P06396; P06702; P10909;…
F-actin capping protein complex	2	8	0.42735	9.80347	0.0165265	1	0.231515	1	P47756; P47755;
spectrin	2	8	0.42735	9.80347	0.0165265	1	0.231515	1	Q01082; Q13813;
pore complex	2	8	0.42735	9.80347	0.0165265	1	0.231515	1	P45880; P21796;
nuclear matrix	7	105	1.49573	2.60798	0.0182952	1	0.254082	1	P22626; P05787; P23528; Q9Y696; P23246; Q99623; Q00839;
cytosolic small ribosomal subunit	4	41	0.854701	3.82007	0.0203363	1	0.280015	1	P62277; P62857; P08865; P69905;
mitochondrial envelope	2	9	0.42735	8.71541	0.020892	1	0.282831	1	P55084; P27338;
sarcoplasm	2	9	0.42735	8.71541	0.020892	1	0.282831	1	P06396; P05413;
proton-transporting ATP synthase complex, catalytic core F(1)	1	1	0.213675	39.0676	0.0255961	1	0.299761	1	P25705;
4-aminobutyrate transaminase complex	1	1	0.213675	39.0676	0.0255961	1	0.299761	1	P80404;
mitochondrial proton-transporting ATP synthase, stator stalk	1	1	0.213675	39.0676	0.0255961	1	0.299761	1	O75947;
pyruvate kinase complex	1	1	0.213675	39.0676	0.0255961	1	0.299761	1	P14618;
tricarboxylic acid cycle enzyme complex	1	1	0.213675	39.0676	0.0255961	1	0.299761	1	P07954;
sperm mitochondrial sheath	1	1	0.213675	39.0676	0.0255961	1	0.299761	1	P54819;
inner dense plaque of desmosome	1	1	0.213675	39.0676	0.0255961	1	0.299761	1	P18206;
inactive sex chromosome	1	1	0.213675	39.0676	0.0255961	1	0.299761	1	Q00839;
succinate-CoA ligase complex (GDP-forming)	1	1	0.213675	39.0676	0.0255961	1	0.299761	1	Q96I99;
mitochondrial proton-transporting ATP synthase, catalytic core	1	1	0.213675	39.0676	0.0255961	1	0.299761	1	P06576;
ATPase complex	1	1	0.213675	39.0676	0.0255961	1	0.299761	1	P55072;
collagen type III trimer	1	1	0.213675	39.0676	0.0255961	1	0.299761	1	P02461;
ooplasm	1	1	0.213675	39.0676	0.0255961	1	0.299761	1	P08238;
lumenal side of lysosomal membrane	1	1	0.213675	39.0676	0.0255961	1	0.299761	1	P11142;
mitochondrial fatty acid beta-oxidation multienzyme complex	1	1	0.213675	39.0676	0.0255961	1	0.299761	1	P40939;
outer dense plaque of desmosome	1	1	0.213675	39.0676	0.0255961	1	0.299761	1	P18206;
phagolysosome membrane	1	1	0.213675	39.0676	0.0255961	1	0.299761	1	P11279;
endolysosome	1	1	0.213675	39.0676	0.0255961	1	0.299761	1	P04196;
invadopodium	2	10	0.42735	7.84474	0.0256778	1	0.299761	1	P26038; P15311;
axon	12	250	2.5641	1.87673	0.0279255	1	0.323655	1	P62258; P05937; Q99497; P00918; P98164; P11310; P08473; P02511; P20711; P27824; P0C0L5; Q99623;
intermediate filament cytoskeleton	4	46	0.854701	3.40493	0.0296823	1	0.340868	1	P50990; P13646; P05787; P05109;
midbody	8	142	1.7094	2.20359	0.0298339	1	0.340868	1	P11021; P28838; P07355; P62826; P50995; Q9Y696; P14625; Q00839;
sodium:potassium-exchanging ATPase complex	2	11	0.42735	7.13223	0.0308599	1	0.347659	1	P05026; P05023;
proteasome core complex, beta-subunit complex	2	11	0.42735	7.13223	0.0308599	1	0.347659	1	P28072; P49721;
synaptic vesicle	6	93	1.28205	2.52442	0.0321384	1	0.359548	1	P11279; P45880; P08473; P20711; P21796; Q15907;
Z disc	7	120	1.49573	2.28201	0.0347007	1	0.385537	1	O00757; P04792; P05787; O43707; P02511; P08727; P02730;
stress fiber	4	49	0.854701	3.19651	0.0363262	1	0.400833	1	O43707; P67936; P06753; P35579;
lipid droplet	5	72	1.06838	2.71807	0.0371542	1	0.407179	1	P55072; Q9H8H3; P07355; Q01105; P04406;
mitochondrial respiratory chain complex III	2	13	0.42735	6.0358	0.04232	1	0.460659	1	P22695; P31930;
clathrin-coated pit	4	52	0.854701	3.01213	0.0437593	1	0.473129	1	O60494; P10809; P98164; P02787;
cell-cell adherens junction	5	77	1.06838	2.5416	0.0473942	1	0.478927	1	P18206; P05783; Q99497; P07355; P35579;
low-density lipoprotein particle	2	14	0.42735	5.60498	0.0485543	1	0.478927	1	P02647; P02649;
MHC class I peptide loading complex	1	2	0.213675	19.631	0.0505385	1	0.478927	1	P27797;
cell-substrate junction	1	2	0.213675	19.631	0.0505385	1	0.478927	1	P18206;
proton-transporting two-sector ATPase complex, catalytic domain	1	2	0.213675	19.631	0.0505385	1	0.478927	1	P36543;
endothelial microparticle	1	2	0.213675	19.631	0.0505385	1	0.478927	1	P08758;
Ku70:Ku80 complex	1	2	0.213675	19.631	0.0505385	1	0.478927	1	P12956;
TRAF2-GSTP1 complex	1	2	0.213675	19.631	0.0505385	1	0.478927	1	P09211;
6-phosphofructokinase complex	1	2	0.213675	19.631	0.0505385	1	0.478927	1	P17858;
hydrogen:potassium-exchanging ATPase complex	1	2	0.213675	19.631	0.0505385	1	0.478927	1	P17900;
PCSK9-AnxA2 complex	1	2	0.213675	19.631	0.0505385	1	0.478927	1	P07355;
RNA nuclear export complex	1	2	0.213675	19.631	0.0505385	1	0.478927	1	P62826;
chromaffin granule	1	2	0.213675	19.631	0.0505385	1	0.478927	1	P10909;
procollagen-proline 4-dioxygenase complex	1	2	0.213675	19.631	0.0505385	1	0.478927	1	P07237;
symbiont-containing vacuole	1	2	0.213675	19.631	0.0505385	1	0.478927	1	P29972;
aryl hydrocarbon receptor complex	1	2	0.213675	19.631	0.0505385	1	0.478927	1	P08238;
lipoprotein particle	1	2	0.213675	19.631	0.0505385	1	0.478927	1	P02649;
VCP-NSFL1C complex	1	2	0.213675	19.631	0.0505385	1	0.478927	1	P55072;
cytoplasmic side of apical plasma membrane	1	2	0.213675	19.631	0.0505385	1	0.478927	1	P15311;
sperm head plasma membrane	1	2	0.213675	19.631	0.0505385	1	0.478927	1	P08238;
fibrillar collagen trimer	1	2	0.213675	19.631	0.0505385	1	0.478927	1	P51884;
basal part of cell	2	15	0.42735	5.23157	0.0550969	1	0.51907	1	P02787; P02533;
endoplasmic reticulum	32	939	6.83761	1.33178	0.0611222	1	0.570091	1	P30101; P08123; O60494; P55084; Q07020; P04004; P62987; P11021; P55072; Q99497; P98164; P04040; P0DMV9; Q9H8H3; P10909; P23284; O95954; O14880; Q01105; P27824; Q9Y646; P05023; P02768; P07237; P01009; P02649; P14625; P05090; P21399; O00264; P27797; Q15084;
protein phosphatase type 2A complex	2	16	0.42735	4.9048	0.0619279	1	0.570091	1	P99999; Q15257;
nuclear nucleosome	2	16	0.42735	4.9048	0.0619279	1	0.570091	1	P10412; P62805;
dystrophin-associated glycoprotein complex	2	16	0.42735	4.9048	0.0619279	1	0.570091	1	P05787; P08727;
cytoplasmic ribonucleoprotein granule	4	60	0.854701	2.61058	0.0674191	1	0.617115	1	Q15365; P07437; P60709; Q00839;
pseudopodium	2	17	0.42735	4.61645	0.0690286	1	0.628277	1	P26038; O43707;
proteasome activator complex	1	3	0.213675	13.109	0.0748437	1	0.634596	1	Q9UL46;
mitochondrial ribonuclease P complex	1	3	0.213675	13.109	0.0748437	1	0.634596	1	Q99714;
microspike	1	3	0.213675	13.109	0.0748437	1	0.634596	1	P15311;
myosin II filament	1	3	0.213675	13.109	0.0748437	1	0.634596	1	P35579;
pentameric IgM immunoglobulin complex	1	3	0.213675	13.109	0.0748437	1	0.634596	1	P01619;
secretory dimeric IgA immunoglobulin complex	1	3	0.213675	13.109	0.0748437	1	0.634596	1	P01876;
Schwann cell microvillus	1	3	0.213675	13.109	0.0748437	1	0.634596	1	P15311;
alphav-beta3 integrin-vitronectin complex	1	3	0.213675	13.109	0.0748437	1	0.634596	1	P04004;
keratohyalin granule	1	3	0.213675	13.109	0.0748437	1	0.634596	1	Q86YZ3;
coated vesicle	1	3	0.213675	13.109	0.0748437	1	0.634596	1	P10809;
actomyosin contractile ring	1	3	0.213675	13.109	0.0748437	1	0.634596	1	P35579;
rough endoplasmic reticulum lumen	1	3	0.213675	13.109	0.0748437	1	0.634596	1	P04004;
glycerol-3-phosphate dehydrogenase complex	1	3	0.213675	13.109	0.0748437	1	0.634596	1	P21695;
cornified envelope	4	64	0.854701	2.44744	0.0812865	1	0.685615	1	P13645; P04264; P35908; Q86YZ3;
apicolateral plasma membrane	2	19	0.42735	4.13076	0.0839663	1	0.70453	1	P05787; P08727;
immunoglobulin complex, circulating	3	41	0.641026	2.86743	0.0870042	1	0.726237	1	P01859; P01834; P01857;
filamentous actin	2	20	0.42735	3.92433	0.0917693	1	0.762064	1	P63261; P67936;
cuticular plate	1	4	0.213675	9.83996	0.098528	1	0.766805	1	Q01082;
eukaryotic translation elongation factor 1 complex	1	4	0.213675	9.83996	0.098528	1	0.766805	1	P29692;
mitochondrial permeability transition pore complex	1	4	0.213675	9.83996	0.098528	1	0.766805	1	P21796;
actin cap	1	4	0.213675	9.83996	0.098528	1	0.766805	1	P06396;
lamin filament	1	4	0.213675	9.83996	0.098528	1	0.766805	1	P02545;
phosphopyruvate hydratase complex	1	4	0.213675	9.83996	0.098528	1	0.766805	1	P06733;
other organism cell membrane	1	4	0.213675	9.83996	0.098528	1	0.766805	1	P02748;
other organism cell	1	4	0.213675	9.83996	0.098528	1	0.766805	1	P0C0L5;
cytolytic granule	1	4	0.213675	9.83996	0.098528	1	0.766805	1	P11279;
central region of growth cone	1	4	0.213675	9.83996	0.098528	1	0.766805	1	P62258;
GAIT complex	1	4	0.213675	9.83996	0.098528	1	0.766805	1	P04406;
cell tip	1	4	0.213675	9.83996	0.098528	1	0.766805	1	P15311;
acrosomal matrix	1	4	0.213675	9.83996	0.098528	1	0.766805	1	P09622;
inclusion body	2	21	0.42735	3.73754	0.0997734	1	0.769066	1	P0DMV9; P08238;
synaptic membrane	2	21	0.42735	3.73754	0.0997734	1	0.769066	1	P02511; Q9BPW8;
catalytic step 2 spliceosome	5	97	1.06838	2.01761	0.103383	1	0.793096	1	P22626; P51991; P07910; P61978; Q00839;
lamellipodium membrane	2	22	0.42735	3.56773	0.107963	1	0.824307	1	P23528; P27487;
lysosome	9	221	1.92308	1.59268	0.115344	1	0.871619	1	P00441; P17174; P11279; Q00610; P98164; P04040; P07339; P53634; Q9Y646;
nuclear chromosome	2	23	0.42735	3.41268	0.116324	1	0.871619	1	P62805; Q00839;
COPII-coated ER to Golgi transport vesicle	2	23	0.42735	3.41268	0.116324	1	0.871619	1	P53634; P01009;
nuclear outer membrane	2	23	0.42735	3.41268	0.116324	1	0.871619	1	P42704; Q9BVC6;
MMXD complex	1	5	0.213675	7.8759	0.121607	1	0.874595	1	P05141;
macropinosome	1	5	0.213675	7.8759	0.121607	1	0.874595	1	P07355;
neurofibrillary tangle	1	5	0.213675	7.8759	0.121607	1	0.874595	1	P10909;
clathrin complex	1	5	0.213675	7.8759	0.121607	1	0.874595	1	Q00610;
lipopolysaccharide receptor complex	1	5	0.213675	7.8759	0.121607	1	0.874595	1	P10809;
respiratory chain complex IV	1	5	0.213675	7.8759	0.121607	1	0.874595	1	P00403;
clathrin coat of coated pit	1	5	0.213675	7.8759	0.121607	1	0.874595	1	Q00610;
sperm head	1	5	0.213675	7.8759	0.121607	1	0.874595	1	P04075;
BRISC complex	1	5	0.213675	7.8759	0.121607	1	0.874595	1	P34897;
dendrite cytoplasm	2	24	0.42735	3.27055	0.124842	1	0.889913	1	P00441; P27824;
nuclear euchromatin	2	24	0.42735	3.27055	0.124842	1	0.889913	1	P16403; P07305;
early endosome	9	231	1.92308	1.52374	0.139808	1	0.967251	1	P10809; P30048; P02787; P07355; P02647; P06727; P35232; P02649; P02652;
centriolar satellite	2	26	0.42735	3.01906	0.142295	1	0.967251	1	P05783; P05062;
astrocyte projection	1	6	0.213675	6.56543	0.144097	1	0.967251	1	P15311;
myosin II complex	1	6	0.213675	6.56543	0.144097	1	0.967251	1	P35579;
CRD-mediated mRNA stability complex	1	6	0.213675	6.56543	0.144097	1	0.967251	1	Q00839;
intercellular canaliculus	1	6	0.213675	6.56543	0.144097	1	0.967251	1	P27487;
alveolar lamellar body	1	6	0.213675	6.56543	0.144097	1	0.967251	1	P11279;
clathrin coat	1	6	0.213675	6.56543	0.144097	1	0.967251	1	Q00610;
myelin sheath adaxonal region	1	6	0.213675	6.56543	0.144097	1	0.967251	1	P07355;
invadopodium membrane	1	6	0.213675	6.56543	0.144097	1	0.967251	1	P27487;
paraspeckles	1	6	0.213675	6.56543	0.144097	1	0.967251	1	P23246;
DNA replication factor A complex	1	6	0.213675	6.56543	0.144097	1	0.967251	1	Q00577;
clathrin coat of trans-Golgi network vesicle	1	6	0.213675	6.56543	0.144097	1	0.967251	1	Q00610;
sperm fibrous sheath	1	6	0.213675	6.56543	0.144097	1	0.967251	1	P21266;
manchette	1	7	0.213675	5.62885	0.166012	1	1	1	P62826;
cardiac myofibril	1	7	0.213675	5.62885	0.166012	1	1	1	P02511;
respiratory chain	1	7	0.213675	5.62885	0.166012	1	1	1	P99999;
membrane attack complex	1	7	0.213675	5.62885	0.166012	1	1	1	P02748;
actin filament bundle	1	7	0.213675	5.62885	0.166012	1	1	1	P02511;
basal plasma membrane	2	29	0.42735	2.70685	0.169335	1	1	1	P02787; P29972;
cell-cell junction	6	146	1.28205	1.60808	0.172095	1	1	1	P18206; P05787; O43707; P23528; Q9Y696; Q9Y490;
cell projection	4	87	0.854701	1.80049	0.183559	1	1	1	P50991; P59998; P15311; P61978;
ruffle membrane	4	87	0.854701	1.80049	0.183559	1	1	1	P23528; P15311; Q9Y490; P07900;
clathrin-sculpted gamma-aminobutyric acid transport vesicle membrane	1	8	0.213675	4.92612	0.187367	1	1	1	P11142;
nuclear lamina	1	8	0.213675	4.92612	0.187367	1	1	1	P02545;
catalytic complex	1	8	0.213675	4.92612	0.187367	1	1	1	P0DP25;
nuclear envelope lumen	1	8	0.213675	4.92612	0.187367	1	1	1	P07437;
cytosolic ribosome	1	8	0.213675	4.92612	0.187367	1	1	1	P05090;
nonhomologous end joining complex	1	8	0.213675	4.92612	0.187367	1	1	1	P12956;
sarcoplasmic reticulum lumen	1	8	0.213675	4.92612	0.187367	1	1	1	P27797;
polysomal ribosome	1	8	0.213675	4.92612	0.187367	1	1	1	P13639;
integral component of mitochondrial membrane	1	8	0.213675	4.92612	0.187367	1	1	1	P12235;
mitochondrial inner membrane presequence translocase complex	1	8	0.213675	4.92612	0.187367	1	1	1	P12236;
ribonucleoprotein complex	1	8	0.213675	4.92612	0.187367	1	1	1	Q00839;
plasma membrane protein complex	1	8	0.213675	4.92612	0.187367	1	1	1	P98160;
HFE-transferrin receptor complex	1	8	0.213675	4.92612	0.187367	1	1	1	P02787;
spectrin-associated cytoskeleton	1	8	0.213675	4.92612	0.187367	1	1	1	Q01082;
anchored component of synaptic vesicle membrane	1	8	0.213675	4.92612	0.187367	1	1	1	Q15907;
VCP-NPL4-UFD1 AAA ATPase complex	1	8	0.213675	4.92612	0.187367	1	1	1	P55072;
immunological synapse	2	31	0.42735	2.53227	0.187802	1	1	1	P15311; P35579;
cytosolic large ribosomal subunit	3	61	0.641026	1.92744	0.205025	1	1	1	Q07020; P62987; P62917;
zonula adherens	1	9	0.213675	4.37938	0.208176	1	1	1	P18206;
Derlin-1 retrotranslocation complex	1	9	0.213675	4.37938	0.208176	1	1	1	P55072;
nuclear telomere cap complex	1	9	0.213675	4.37938	0.208176	1	1	1	P12956;
azurophil granule	1	10	0.213675	3.94188	0.228454	1	1	1	P50995;
Schmidt-Lanterman incisure	1	10	0.213675	3.94188	0.228454	1	1	1	P07355;
spindle pole centrosome	1	10	0.213675	3.94188	0.228454	1	1	1	P06748;
fascia adherens	1	10	0.213675	3.94188	0.228454	1	1	1	P18206;
neuron projection	8	229	1.7094	1.36645	0.234186	1	1	1	P80404; P25325; P09417; P08670; O43707; P23526; P06744; O00264;
microtubule	10	299	2.13675	1.30787	0.237965	1	1	1	P50990; P42704; Q8TF72; P50991; P68363; P49368; P07437; P68366; Q9BVA1; P68371;
cell cortex region	1	11	0.213675	3.58385	0.248213	1	1	1	P06733;
Arp2/3 protein complex	1	11	0.213675	3.58385	0.248213	1	1	1	P59998;
Prp19 complex	1	11	0.213675	3.58385	0.248213	1	1	1	P11142;
dense core granule	1	11	0.213675	3.58385	0.248213	1	1	1	P00441;
apical junction complex	1	11	0.213675	3.58385	0.248213	1	1	1	Q8TF72;
ER-mitochondrion membrane contact site	1	11	0.213675	3.58385	0.248213	1	1	1	P27824;
endoplasmic reticulum-Golgi intermediate compartment membrane	3	68	0.641026	1.72906	0.252454	1	1	1	P53634; P01009; P27797;
secretory granule	3	68	0.641026	1.72906	0.252454	1	1	1	P02452; P10809; Q16563;
intracellular membrane-bounded organelle	18	591	3.84615	1.19052	0.257178	1	1	1	Q13813; P04004; P55072; P02760; Q9UHK6; P04040; O14880; P00167; P30837; P53634; P30044; P21281; P16662; P01009; Q9UJW2; P51648; P09110; P04406;
filopodium	3	69	0.641026	1.704	0.259365	1	1	1	O14745; P26038; P15311;
T-tubule	2	39	0.42735	2.01297	0.263557	1	1	1	P05023; P15311;
cell leading edge	2	39	0.42735	2.01297	0.263557	1	1	1	P08670; P35579;
cytoplasmic microtubule	2	39	0.42735	2.01297	0.263557	1	1	1	Q7Z4W1; P68363;
aggresome	2	39	0.42735	2.01297	0.263557	1	1	1	P13639; P0DMV9;
cytoplasmic vesicle membrane	5	135	1.06838	1.44973	0.26443	1	1	1	P62258; P27348; P31946; Q9Y696; P63104;
mitotic spindle midzone	1	12	0.213675	3.28545	0.267468	1	1	1	Q00839;
polysome	2	40	0.42735	1.96265	0.273106	1	1	1	P08670; P27797;
sarcomere	2	40	0.42735	1.96265	0.273106	1	1	1	P47756; P0DP25;
axon cytoplasm	2	41	0.42735	1.9148	0.28265	1	1	1	P00441; P04792;
90S preribosome	1	13	0.213675	3.03292	0.28623	1	1	1	P08865;
actomyosin	1	13	0.213675	3.03292	0.28623	1	1	1	P35579;
specific granule	1	13	0.213675	3.03292	0.28623	1	1	1	P50995;
protein-DNA complex	2	43	0.42735	1.82576	0.301698	1	1	1	P12956; P06748;
clathrin-coated vesicle membrane	2	43	0.42735	1.82576	0.301698	1	1	1	P98164; P02787;
mitochondrial respiratory chain	1	14	0.213675	2.81643	0.304513	1	1	1	P31930;
platelet dense granule lumen	1	14	0.213675	2.81643	0.304513	1	1	1	Q14624;
small ribosomal subunit	1	14	0.213675	2.81643	0.304513	1	1	1	P62857;
endolysosome membrane	1	14	0.213675	2.81643	0.304513	1	1	1	Q00610;
apical dendrite	1	14	0.213675	2.81643	0.304513	1	1	1	P10909;
WASH complex	1	14	0.213675	2.81643	0.304513	1	1	1	P47756;
neuronal cell body	10	323	2.13675	1.21069	0.314972	1	1	1	P00441; P11279; P05937; P12277; Q00577; P20711; P27824; P02649; P05090; O00264;
ribosome	2	45	0.42735	1.74463	0.320657	1	1	1	P27824; P62277;
stereocilium tip	1	15	0.213675	2.6288	0.322328	1	1	1	O14745;
intercalated disc	2	46	0.42735	1.70671	0.33009	1	1	1	P05026; P05023;
male germ cell nucleus	1	16	0.213675	2.4646	0.339688	1	1	1	P62826;
integral component of synaptic vesicle membrane	1	16	0.213675	2.4646	0.339688	1	1	1	Q16563;
axolemma	1	16	0.213675	2.4646	0.339688	1	1	1	Q01082;
neuron projection terminus	1	16	0.213675	2.4646	0.339688	1	1	1	P08473;
cell cortex	4	117	0.854701	1.33887	0.351541	1	1	1	P07737; P07355; P02675; P02671;
endosome lumen	1	17	0.213675	2.31971	0.356605	1	1	1	P98164;
ciliary membrane	2	49	0.42735	1.60224	0.358153	1	1	1	P06744; P07911;
spindle	4	119	0.854701	1.31637	0.363196	1	1	1	Q00610; P04792; P50995; P35579;
nuclear chromosome, telomeric region	3	85	0.641026	1.38329	0.371453	1	1	1	P12956; Q00577; P62805;
calcium channel complex	1	18	0.213675	2.19091	0.373088	1	1	1	Q15257;
NuA4 histone acetyltransferase complex	1	18	0.213675	2.19091	0.373088	1	1	1	P60709;
organelle membrane	3	86	0.641026	1.36721	0.378429	1	1	1	O14880; P16662; P07099;
proteinaceous extracellular matrix	8	268	1.7094	1.16761	0.379932	1	1	1	P51888; P12109; P07585; P12111; P01009; P51884; P21810; P27797;
spliceosomal complex	3	87	0.641026	1.35149	0.385389	1	1	1	P22626; P07910; P11142;
nuclear envelope	5	162	1.06838	1.20813	0.400242	1	1	1	O14880; P06703; P62826; P50995; P02545;
clathrin-coated endocytic vesicle membrane	2	54	0.42735	1.45391	0.403904	1	1	1	Q00610; P02649;
plasma membrane raft	1	20	0.213675	1.97193	0.404802	1	1	1	P15311;
adherens junction	2	55	0.42735	1.42748	0.412871	1	1	1	P18206; Q8TF72;
endosome	7	240	1.49573	1.14105	0.417081	1	1	1	Q00610; P36543; Q56VL3; P07355; P09429; P05023; P15311;
sperm midpiece	1	21	0.213675	1.87807	0.420054	1	1	1	O14745;
multivesicular body	1	21	0.213675	1.87807	0.420054	1	1	1	P11279;
transcriptionally active chromatin	1	21	0.213675	1.87807	0.420054	1	1	1	P16403;
I band	1	21	0.213675	1.87807	0.420054	1	1	1	P04075;
condensed chromosome	1	21	0.213675	1.87807	0.420054	1	1	1	P09429;
host cell	2	56	0.42735	1.402	0.421771	1	1	1	P62987; P62826;
nuclear heterochromatin	1	22	0.213675	1.79274	0.434915	1	1	1	P10412;
presynapse	2	58	0.42735	1.35366	0.439359	1	1	1	Q99497; P11142;
dendrite	9	323	1.92308	1.08975	0.445524	1	1	1	P11279; P05937; P98164; P12277; Q00577; P08473; P02649; P0C0L5; P05090;
synapse	5	172	1.06838	1.13789	0.450645	1	1	1	P05937; P25325; P08473; P0C0L5; O00264;
terminal bouton	2	60	0.42735	1.30855	0.456651	1	1	1	P05937; P30043;
clathrin-coated endocytic vesicle	1	24	0.213675	1.64341	0.463508	1	1	1	Q00610;
ficolin-1-rich granule membrane	2	61	0.42735	1.2871	0.46518	1	1	1	P11279; O43451;
endoplasmic reticulum quality control compartment	1	25	0.213675	1.5777	0.477258	1	1	1	P62987;
vesicle membrane	1	25	0.213675	1.5777	0.477258	1	1	1	P09525;
extrinsic component of membrane	2	64	0.42735	1.22677	0.490286	1	1	1	P15311; P07911;
extrinsic component of plasma membrane	1	26	0.213675	1.51704	0.490656	1	1	1	P07355;
myofibril	1	27	0.213675	1.46088	0.503712	1	1	1	P63261;
condensed nuclear chromosome	1	27	0.213675	1.46088	0.503712	1	1	1	P42704;
intrinsic component of plasma membrane	1	27	0.213675	1.46088	0.503712	1	1	1	P36269;
nuclear chromatin	5	183	1.06838	1.0695	0.504713	1	1	1	Q71UI9; P07910; P60709; P07305; P61978;
caveola	2	66	0.42735	1.1896	0.506606	1	1	1	P05026; P05023;
recycling endosome	3	108	0.641026	1.08873	0.524935	1	1	1	P02787; P62826; Q15907;
anchored component of membrane	3	108	0.641026	1.08873	0.524935	1	1	1	O43895; P16444; P07911;
site of double-strand break	1	32	0.213675	1.23268	0.564149	1	1	1	P55072;
spindle pole	3	116	0.641026	1.01365	0.573398	1	1	1	P0DP25; P07911; Q00839;
sperm flagellum	1	33	0.213675	1.19534	0.575325	1	1	1	P62826;
dendritic spine	3	118	0.641026	0.996469	0.585024	1	1	1	P05937; P02511; P27824;
sarcoplasmic reticulum membrane	1	34	0.213675	1.1602	0.586215	1	1	1	Q9BVC6;
motile cilium	2	77	0.42735	1.01968	0.590073	1	1	1	P09622; Q00796;
late endosome	3	119	0.641026	0.988096	0.590761	1	1	1	P11279; P02787; P11142;
nuclear speck	9	368	1.92308	0.956492	0.602277	1	1	1	Q15365; Q5SSJ5; P29401; Q9BRL6; P0DMV9; P11310; P23246; P02545; Q00839;
centriole	3	124	0.641026	0.948257	0.61867	1	1	1	P0DMV9; O95954; P62826;
fibrillar center	3	127	0.641026	0.925859	0.634784	1	1	1	Q13228; P29692; P15311;
chromatin	2	84	0.42735	0.93472	0.637483	1	1	1	Q99497; P23246;
cell	1	40	0.213675	0.986209	0.645944	1	1	1	P18206;
chromosome, telomeric region	1	42	0.213675	0.939258	0.663876	1	1	1	P22626;
cytoplasmic vesicle	5	220	1.06838	0.889635	0.667204	1	1	1	P00441; P02787; Q07075; P02647; P30044;
acrosomal vesicle	2	89	0.42735	0.882213	0.668641	1	1	1	P45880; P27797;
nuclear body	6	266	1.28205	0.882659	0.679117	1	1	1	P29401; Q06278; O43707; O75489; Q9H0W9; P07305;
cytoplasmic side of plasma membrane	1	44	0.213675	0.896574	0.680902	1	1	1	P17900;
nuclear inner membrane	1	46	0.213675	0.857601	0.697067	1	1	1	P42704;
rough endoplasmic reticulum	1	47	0.213675	0.839358	0.70484	1	1	1	P27824;
chloride channel complex	1	48	0.213675	0.821875	0.712415	1	1	1	Q9Y696;
RNA polymerase II transcription factor complex	1	49	0.213675	0.805106	0.719795	1	1	1	P23246;
kinesin complex	1	49	0.213675	0.805106	0.719795	1	1	1	P62258;
axon terminus	1	49	0.213675	0.805106	0.719795	1	1	1	P17174;
cleavage furrow	1	50	0.213675	0.789007	0.726987	1	1	1	P35579;
Cajal body	1	50	0.213675	0.789007	0.726987	1	1	1	P22626;
mitotic spindle	1	52	0.213675	0.758666	0.740822	1	1	1	Q00839;
transcriptional repressor complex	1	52	0.213675	0.758666	0.740822	1	1	1	P31946;
secretory granule membrane	2	103	0.42735	0.762312	0.744428	1	1	1	P08473; P15144;
endosome membrane	4	197	0.854701	0.795193	0.74605	1	1	1	O60494; P11279; P62987; P02787;
neuromuscular junction	1	55	0.213675	0.717292	0.760273	1	1	1	P35579;
clathrin-coated vesicle	1	55	0.213675	0.717292	0.760273	1	1	1	Q00610;
endomembrane system	2	108	0.42735	0.727023	0.767663	1	1	1	O14745; P21281;
integral component of lumenal side of endoplasmic reticulum membrane	2	108	0.42735	0.727023	0.767663	1	1	1	P27824; P27797;
collagen trimer	1	58	0.213675	0.680197	0.778268	1	1	1	P39060;
azurophil granule membrane	1	58	0.213675	0.680197	0.778268	1	1	1	P11279;
nuclear pore	1	61	0.213675	0.64675	0.794915	1	1	1	P62826;
perikaryon	2	115	0.42735	0.682774	0.797094	1	1	1	P00505; P02511;
lamellipodium	3	169	0.641026	0.695778	0.810894	1	1	1	P06396; P23528; P27487;
cilium	3	171	0.641026	0.68764	0.817126	1	1	1	P50990; P14618; P07911;
late endosome membrane	2	123	0.42735	0.638369	0.826652	1	1	1	P08133; P07355;
kinetochore	1	71	0.213675	0.555672	0.841907	1	1	1	Q00839;
nucleoplasm	69	2995	14.7436	0.900181	0.849373	1	1	1	P28072; P50990; P00325; P22626; Q15365; O75947; P00441; O75306; P17174; P29401; P42704; P51991; P12956; P62987; P55072; P21912; O00757; P56134; Q71DI3; Q14103; P50991; Q96KP4; P05787; Q16698; P07910; P0DMV9; P14174; P06748; P28838; P16083; P06702; P49721; Q99879; Q16778; P30837; P09429; P11142; P22314; P02511; Q01105; P62826; P53634; P22695; P35232; P62277; Q02252; P50995; Q9UL46; Q15257; P60709;…
tertiary granule membrane	1	73	0.213675	0.54045	0.849927	1	1	1	O43451;
extrinsic component of cytoplasmic side of plasma membrane	1	73	0.213675	0.54045	0.849927	1	1	1	P06703;
intracellular	11	559	2.35043	0.769456	0.851241	1	1	1	P05026; P42330; P10909; P11142; O43707; P01011; Q9Y696; P09211; P08758; P00491; P27797;
centrosome	8	430	1.7094	0.72773	0.863584	1	1	1	P50990; P50991; P0DMV9; P06748; P53634; Q9Y696; Q9NQR4; Q00839;
nuclear membrane	4	239	0.854701	0.655458	0.864059	1	1	1	P09525; P02545; P29972; P04406;
endocytic vesicle membrane	1	79	0.213675	0.499408	0.871633	1	1	1	P62987;
phagocytic vesicle membrane	2	138	0.42735	0.568986	0.871826	1	1	1	Q15907; P27797;
recycling endosome membrane	2	139	0.42735	0.564893	0.874416	1	1	1	P30101; Q15907;
postsynaptic density	3	199	0.641026	0.590892	0.887511	1	1	1	Q01082; P02511; P05023;
Golgi apparatus	18	903	3.84615	0.779179	0.890885	1	1	1	O60494; P02452; P02765; P98164; P04040; P10909; O95954; P02511; O43488; Q9Y646; P05023; P02768; P01009; P02649; P07305; P21399; P27797; P50395;
microtubule organizing center	2	151	0.42735	0.520004	0.901945	1	1	1	P05783; P05062;
condensed chromosome kinetochore	1	91	0.213675	0.433559	0.906096	1	1	1	Q00839;
specific granule membrane	1	91	0.213675	0.433559	0.906096	1	1	1	O00264;
transport vesicle	1	95	0.213675	0.415306	0.915393	1	1	1	P21810;
trans-Golgi network membrane	1	96	0.213675	0.410981	0.91757	1	1	1	Q00610;
PML body	1	96	0.213675	0.410981	0.91757	1	1	1	Q99497;
integral component of endoplasmic reticulum membrane	1	103	0.213675	0.383053	0.931321	1	1	1	P11021;
ciliary basal body	1	104	0.213675	0.37937	0.933089	1	1	1	P15311;
chromosome	1	118	0.213675	0.334364	0.953562	1	1	1	Q5SSJ5;
nucleolus	14	824	2.99145	0.664235	0.963419	1	1	1	Q01082; P31040; Q07020; P12956; P08559; P05783; Q13228; P06748; Q96IU4; P11142; P62826; P62277; P38646; P49748;
receptor complex	1	132	0.213675	0.298903	0.96778	1	1	1	P98164;
trans-Golgi network	1	132	0.213675	0.298903	0.96778	1	1	1	P28838;
endoplasmic reticulum membrane	14	881	2.99145	0.62126	0.981867	1	1	1	P32754; P62987; P11021; P55072; O14880; P00167; P27824; P16662; P14625; P07099; Q9BTZ2; P51648; P33121; Q15084;
plasma membrane	94	4412	20.0855	0.832442	0.98467	1	1	1	P13639; P00325; P01008; O60494; P11279; Q01518; P02748; O43895; Q5T2W1; P00505; P98160; P05026; Q96I99; P08195; Q00610; P25705; P62987; P11021; P10809; P18206; P21912; Q99497; O00757; Q7Z4W1; P04792; P02760; P00918; P13647; Q9UHK6; O43451; P98164; P04040; P63261; P53597; P01834; P08670; P00740; P18827; P38606; P06733; P06396; P06702; P07355; P02679; Q99714; P01624; P49368; P05109; P04196; Q07075;…
transcription factor complex	1	174	0.213675	0.226758	0.989257	1	1	1	P12956;
cell junction	6	503	1.28205	0.466782	0.989878	1	1	1	O00757; P25325; P06702; P16444; Q15907; P0C0L5;
integral component of plasma membrane	16	1420	3.4188	0.44047	0.999974	1	1	1	P11279; P02748; Q02978; P12235; O75309; P18827; P38606; Q16563; Q07075; P08473; Q00325; P05141; P35232; P02730; O00264; P29972;
Golgi membrane	4	676	0.854701	0.231744	0.999979	1	1	1	P32754; O95954; P53634; P01009;
integral component of membrane	28	3662	5.98291	0.29882	1	1	1	1	P00403; P08195; P56134; P53007; O43451; P98164; Q9BVC6; Q16563; O14880; P00167; P08473; P12236; P15144; P09669; P05023; Q13113; P21281; P19440; Q96NB2; P16662; P02730; P27487; P27338; P07099; P51648; P33121; P36269; Q9Y6C9;

## Sheet: Biological process
Dataset: common to all SDS Buffers
Enrichment analysis: Biological process
Number of proteins in the dataset: 468
Number of proteins in the dataset (which are available in Biological process database) :460
Number of proteins in background: 16701
						Corrected p-values
Biological process	No. of genes in the dataset	No.of genes in the background dataset	Percentage of proteins	Fold enrichment	P-value (Hypergeometric test)	Bonferroni method	BH method	Q-value (Storey-Tibshirani method)	Mapped gene names
neutrophil degranulation	61	484	13.2609	4.57638	9.98596e-24	1.17035e-19	1.17035e-19	6.62711e-19	P13639; P50990; Q13813; P02792; P11279; Q01518; P02765; P61626; P04217; P12956; O75874; P36871; P18206; P55072; O43451; P04040; P07339; P17858; P0DMV9; P14174; Q9H8H3; P06396; P06702; P07355; P13716; P02763; P18669; P05109; P08473; P14618; P09429; P11142; P02766; P01011; P15144; Q6XQN6; P53634; P01024; P02794; P07437; P04075; P01009; P09211; Q9NQR4; P04264; P08238; P30041; P06744; P62937; P00491;…
gluconeogenesis	22	45	4.78261	17.7536	6.68643e-23	7.83649e-19	3.91825e-19	2.2187e-18	P40926; P17174; P35558; P00505; P36871; P60174; Q02978; P11498; P02753; O00757; P53007; P00558; P06733; P18669; P05062; P09467; Q16822; P40925; P04075; P06744; P21695; P04406;
tricarboxylic acid cycle	18	30	3.91304	21.7883	3.82345e-21	4.48108e-17	1.49369e-17	8.45801e-17	P40926; P31040; O75390; P07954; Q96I99; O75874; P08559; P21912; Q9P2R7; P53597; P40925; P09622; P36957; P11177; Q99798; P48735; P21399; Q02218;
platelet degranulation	26	124	5.65217	7.61481	4.4946e-16	5.26767e-12	1.31692e-12	7.45701e-12	P05155; P01023; P00441; P02765; P04217; P37802; P18206; P02787; P10909; Q14624; P02679; P02763; P04196; P02675; P02647; O43707; P01011; P04075; P02768; P01009; P68366; P08758; P01042; P02671; Q9Y490; P19652;
fatty acid beta-oxidation	15	42	3.26087	12.9719	1.58579e-13	1.85855e-09	3.7171e-10	2.1048e-09	P30084; Q08426; P55084; P42765; P42126; Q16698; P11310; P40939; Q9BUT1; Q16836; P24752; P51659; P49748; Q13011; P09110;
ATP biosynthetic process	12	29	2.6087	15.0304	5.61171e-12	6.57692e-08	1.09615e-08	6.20695e-08	O75947; P25705; P56134; P30613; P14618; P04075; P56385; P36542; P48047; P30049; P06576; P24539;
hydrogen peroxide catabolic process	10	19	2.17391	19.1173	1.68725e-11	1.97746e-07	2.51968e-08	1.42676e-07	Q06830; P32119; P04040; P30048; P22352; P06727; P30044; P30041; P68871; P69905;
interleukin-12-mediated signaling pathway	15	56	3.26087	9.7295	1.83358e-11	2.14895e-07	2.51968e-08	1.42676e-07	P22626; P00441; P14174; P07355; P00915; P26038; P04179; P27824; P23528; Q9UL46; P07237; P38646; P37837; P62937; P78417;
canonical glycolysis	11	25	2.3913	15.9827	1.93491e-11	2.26771e-07	2.51968e-08	1.42676e-07	P60174; P30613; P00558; P17858; P06733; P18669; P05062; P14618; P04075; P06744; P04406;
mitochondrial ATP synthesis coupled proton transport	10	21	2.17391	17.2975	6.13077e-11	7.18526e-07	7.18526e-08	4.06864e-07	O75947; P25705; P56134; P10606; P56385; P36542; P48047; P30049; P06576; P24539;
cellular protein metabolic process	25	192	5.43478	4.72896	1.14174e-10	1.33812e-06	1.21647e-07	6.88825e-07	P01008; P02765; P61626; P98160; P05937; P62987; Q71DI3; P06396; P02787; P02679; P02647; P02766; P06727; P01024; P02743; P02768; P07237; P01009; P01042; P02649; P02671; P14625; P02652; P62805; Q15084;
protein homotetramerization	16	74	3.47826	7.85374	1.31318e-10	1.53905e-06	1.28254e-07	7.26237e-07	Q7Z4W1; P04040; Q16698; P34896; P17858; Q99714; Q14117; P14618; P22352; P04179; P51649; P09467; P04075; O94925; P34897; Q08257;
cristae formation	11	31	2.3913	12.8902	3.16514e-10	3.70954e-06	2.8535e-07	1.61579e-06	O75947; P25705; P56134; Q16891; Q9NX63; P56385; P36542; P48047; P30049; P06576; P24539;
retina homeostasis	12	40	2.6087	10.8981	4.58704e-10	5.37601e-06	3.84001e-07	2.1744e-06	P01876; P00441; Q06830; P61626; P04792; P63261; P01834; P02787; P25311; P02768; P60709; P04264;
glycolytic process	10	26	2.17391	13.9723	8.15745e-10	9.56053e-06	6.37369e-07	3.60909e-06	P36871; P60174; P30613; P00558; P17858; P00338; P18669; P05062; P04075; Q02218;
receptor-mediated endocytosis	21	151	4.56522	5.05121	1.05927e-09	1.24146e-05	7.75914e-07	4.3936e-06	P01876; O60494; Q01518; P98160; Q00610; P02760; P98164; P01834; P01624; P02647; P02768; P02649; P14625; P01615; P01619; P68871; P02790; P00738; P27797; P69905; P07900;
cellular aldehyde metabolic process	7	10	1.52174	25.4249	1.28415e-09	1.50503e-05	8.8531e-07	5.01305e-06	O43488; P14550; O95154; P51648; P49189; P00352; P49419;
xenobiotic metabolic process	16	86	3.47826	6.75799	1.39317e-09	1.6328e-05	9.0711e-07	5.13649e-06	Q68CK6; Q03154; Q969Z3; P16083; O14880; O43488; Q86WA6; P16444; Q96DG6; P19440; P09211; P08238; P34913; O95154; P07099; Q6IB77;
cellular response to oxidative stress	16	91	3.47826	6.38672	3.308e-09	3.87698e-05	2.04052e-06	1.15544e-05	P00441; Q06830; Q99497; P32119; P04040; P30048; P0DMV9; P10599; P22352; P04179; P99999; P30044; P07237; P09211; P30041; P00390;
oxaloacetate metabolic process	7	12	1.52174	21.191	8.07817e-09	9.46762e-05	4.73381e-06	2.68051e-05	P40926; P17174; P35558; P00505; Q16822; P40925; Q9NQR4;
platelet aggregation	11	41	2.3913	9.74705	9.20812e-09	0.000107919	5.13901e-06	2.90995e-05	P18206; P04792; P63261; P02679; P02675; P21291; P60709; P02671; Q9Y490; P68871; P35579;
substantia nigra development	11	42	2.3913	9.51503	1.21691e-08	0.000142622	6.4828e-06	3.67087e-05	P62258; P14854; P11021; P12277; P00338; P27348; P00367; O75489; P60709; P27338; P24539;
branched-chain amino acid catabolic process	8	19	1.73913	15.2977	1.8049e-08	0.000211534	9.19715e-06	5.20787e-05	Q6NVY1; Q99714; Q02252; P09622; P24752; P26440; P31937; P45954;
glutathione metabolic process	10	36	2.17391	10.0922	3.04835e-08	0.000357266	1.48861e-05	8.42922e-05	P00441; O75874; P26641; P30711; P21266; P51649; P16444; P09211; P78417; P00390;
movement of cell or subcellular component	14	80	3.04348	6.35725	3.40203e-08	0.000398718	1.59487e-05	9.03093e-05	P18206; P04792; P63261; P08670; P47756; P26038; P10599; P47755; P67936; P07437; P60709; P06753; Q9Y490; P68371;
mitochondrial electron transport, cytochrome c to oxygen	8	21	1.73913	13.8415	4.62894e-08	0.000542511	2.08658e-05	0.000118152	P00403; O00483; P14854; P20674; P99999; P10606; P13073; P09669;
response to hydrogen peroxide	11	49	2.3913	8.15602	6.96021e-08	0.000815737	2.97167e-05	0.00016827	P13639; P00441; P02452; P04040; P30048; P18827; P00338; P02511; P68871; P00738; P69905;
pyruvate metabolic process	8	22	1.73913	13.2126	7.09956e-08	0.000832069	2.97167e-05	0.00016827	P08559; Q16775; P11498; P00338; Q16822; P07195; P09622; P11177;
protein stabilization	19	159	4.13043	4.34043	8.15594e-08	0.000955877	3.29613e-05	0.000186642	P50990; P11279; P05026; P10809; Q99497; P50991; P07737; P0DMV9; P10909; P23284; P49368; P02647; P02511; P35232; P08238; Q99623; P27797; P04406; P07900;
retinoid metabolic process	12	61	2.6087	7.1469	8.46299e-08	0.000991863	3.30621e-05	0.000187213	P98160; P02753; P42330; P98164; P18827; P02647; P02766; P06727; P02649; P02652; P00352; P11766;
glyoxylate metabolic process	5	6	1.08696	30.2649	9.09996e-08	0.00106652	3.44037e-05	0.00019481	P00505; Q9UF12; Q9BYV1; P30038; Q86XE5;
fructose 1,6-bisphosphate metabolic process	5	7	1.08696	25.9475	3.1127e-07	0.00364808	0.000114003	0.000645537	O00757; P17858; P05062; P09467; P04075;
lysine catabolic process	6	12	1.30435	18.168	3.39272e-07	0.00397627	0.000120493	0.00068229	Q14894; Q9P0Z9; P09622; P36957; Q02218; P49419;
cell redox homeostasis	12	71	2.6087	6.14043	4.84668e-07	0.00568031	0.000167068	0.000946018	P30101; Q06830; P32119; P30048; P10599; P35754; P30044; P07237; P09622; P30041; P00390; Q15084;
cellular amino acid metabolic process	8	28	1.73913	10.3823	5.96604e-07	0.0069922	0.000199777	0.00113123	P48637; Q03154; P09417; P12955; P20711; Q86WA6; P19440; P36269;
fibrinolysis	7	21	1.52174	12.1134	9.56004e-07	0.0112044	0.000305528	0.00173004	P05155; P07355; P02679; P04196; P02675; P04264; P02671;
oxidation-reduction process	16	135	3.47826	4.30527	9.6455e-07	0.0113045	0.000305528	0.00173004	P31040; P42330; P16152; Q7Z4W1; Q969Z3; Q06278; P11310; P16083; Q9P0Z9; Q9UBQ7; P10599; P31930; Q9BTZ2; P51648; P49189; P00352;
epithelial cell differentiation	11	66	2.3913	6.05554	1.68289e-06	0.0197235	0.000519039	0.00293905	Q01995; P37802; P16152; P00558; Q16762; O43598; P21796; P02462; Q9BUT1; P49748; P09525;
succinate metabolic process	5	9	1.08696	20.1878	1.78388e-06	0.0209071	0.00053608	0.00303554	P31040; Q96I99; P21912; Q9P2R7; P51649;
ATP metabolic process	8	32	1.73913	9.08495	1.83257e-06	0.0214777	0.000536942	0.00304043	P05026; P27144; P55072; P0DMV9; P38606; P11142; P21281; P28331;
protein folding	17	159	3.69565	3.88379	1.90142e-06	0.0222846	0.000543528	0.00307772	P30101; P50990; P62987; P55072; P50991; P49368; P61604; P11142; P02511; P27824; P02743; P07237; P38646; P08238; P62937; P27797; Q15084;
glucose metabolic process	10	56	2.17391	6.48849	2.60746e-06	0.0305594	0.000723818	0.00409861	P35558; P36871; P08559; Q7Z4W1; P51649; Q96C23; P11177; Q00796; P14550; P05090;
glucuronate catabolic process to xylulose 5-phosphate	4	5	0.869565	29.0591	2.77917e-06	0.0325718	0.000723818	0.00409861	Q9Y2S2; Q7Z4W1; Q00796; P14550;
carnitine biosynthetic process	4	5	0.869565	29.0591	2.77917e-06	0.0325718	0.000723818	0.00409861	P34896; P11310; O75936; P49189;
fructose catabolic process to hydroxyacetone phosphate and glyceraldehyde-3-phosphate	4	5	0.869565	29.0591	2.77917e-06	0.0325718	0.000723818	0.00409861	P05062; P50053; Q3LXA3; P00352;
chylomicron assembly	5	10	1.08696	18.171	3.48694e-06	0.040867	0.00086951	0.00492358	P02647; P06727; P07237; P02649; P02652;
removal of superoxide radicals	5	10	1.08696	18.171	3.48694e-06	0.040867	0.00086951	0.00492358	P00441; Q06830; P32119; P04179; P06727;
2-oxoglutarate metabolic process	6	17	1.30435	12.8276	4.04046e-06	0.0473542	0.000986546	0.0055863	P17174; P00505; O75874; P09622; P48735; Q02218;
response to cadmium ion	7	26	1.52174	9.78483	4.79911e-06	0.0562455	0.00114787	0.00649978	P48637; P04040; P46952; P13716; P00167; Q00796; P06744;
chaperone-mediated protein folding	9	48	1.95652	6.81347	5.44706e-06	0.0638395	0.00127679	0.0072298	P50990; P10809; P04792; P50991; P10909; P23284; P49368; P27824; P27797;
acute-phase response	8	37	1.73913	7.85758	5.96027e-06	0.0698544	0.00136969	0.00775587	P02765; Q14624; P02763; P01011; P02743; P01009; P00738; P19652;
L-phenylalanine catabolic process	5	11	1.08696	16.5206	6.248e-06	0.0732265	0.0014082	0.00797392	P16930; P32754; Q93099; P09417; P00439;
aging	16	158	3.47826	3.6786	7.69826e-06	0.0902236	0.00170233	0.00963942	P05155; P13639; P35558; P48637; P80404; P02461; P04040; P07585; P06396; P08572; P02511; P53634; P27824; P02533; P09622; P05090;
choline catabolic process	4	6	0.869565	24.224	8.1555e-06	0.0955825	0.00173786	0.00984061	Q93088; Q8NE62; Q9UI17; P49419;
positive regulation by host of viral process	4	6	0.869565	24.224	8.1555e-06	0.0955825	0.00173786	0.00984061	P11498; P23284; P23528; P02649;
response to drug	23	297	5	2.81268	8.67366e-06	0.101655	0.00181527	0.0102789	P13639; P00441; P02452; P80404; P27144; Q14103; P04040; P39060; P00338; P13716; P40939; P02647; P05023; Q16836; Q00796; P27338; P05413; P02652; P05090; P00491; P33121; P29972; P27797;
ethanol oxidation	5	12	1.08696	15.145	1.04685e-05	0.122691	0.00212293	0.012021	P00325; P30837; P05091; P00352; P11766;
collagen catabolic process	10	65	2.17391	5.59023	1.0506e-05	0.12313	0.00212293	0.012021	P08123; P02452; P02461; P12109; P07339; P39060; P08572; P12955; P12111; P02462;
mitochondrion organization	11	81	2.3913	4.93428	1.31058e-05	0.1536	0.00260339	0.0147417	Q99497; P30048; Q99714; P35914; P04179; P99999; P35232; P00367; P06576; P48735; Q99623;
defense response to fungus	7	30	1.52174	8.48062	1.35008e-05	0.15823	0.00263716	0.0149329	P06702; P05109; P04196; P81605; Q14019; P59666; P04406;
response to nutrient	10	69	2.17391	5.2662	1.80884e-05	0.211996	0.00346288	0.0196085	P01008; P42330; P30613; P00338; P14618; P35914; P02647; P13073; P23526; P33121;
xenobiotic catabolic process	4	7	0.869565	20.7683	1.86145e-05	0.218162	0.00346288	0.0196085	P21266; P78417; P33121; Q08257;
NADH metabolic process	4	7	0.869565	20.7683	1.86145e-05	0.218162	0.00346288	0.0196085	P40926; P55072; P40925; Q02218;
glutathione derivative biosynthetic process	6	22	1.30435	9.91357	2.16651e-05	0.253915	0.00396742	0.0224654	P30711; P21266; O14880; P09211; P14550; P78417;
response to ethanol	12	102	2.6087	4.27441	2.3656e-05	0.277248	0.00426535	0.0241525	P13639; P00441; P00505; P80404; P02753; P04040; P06396; P13716; P05109; P49411; P09211; P27338;
respiratory electron transport chain	5	14	1.08696	12.983	2.52793e-05	0.296273	0.00442199	0.0250394	P31040; P38117; P21912; P13804; P51649;
protein folding in endoplasmic reticulum	5	14	1.08696	12.983	2.52793e-05	0.296273	0.00442199	0.0250394	P30101; P11021; P27824; P14625; P27797;
cellular nitrogen compound metabolic process	6	23	1.30435	9.48273	2.86334e-05	0.335584	0.00493506	0.0279447	P08559; Q9UBQ7; P09622; P36957; P11177; Q02218;
fructose 6-phosphate metabolic process	4	8	0.869565	18.1755	3.64177e-05	0.426816	0.00611795	0.0346428	O00757; P17858; P09467; P37837;
glutathione biosynthetic process	5	15	1.08696	12.118	3.70627e-05	0.434375	0.00611795	0.0346428	P48637; Q16775; Q96KP4; P19440; P36269;
fatty acid beta-oxidation using acyl-CoA dehydrogenase	5	15	1.08696	12.118	3.70627e-05	0.434375	0.00611795	0.0346428	P38117; P13804; P11310; P49748; P26440;
extracellular matrix organization	17	199	3.69565	3.10317	3.77981e-05	0.442994	0.00615269	0.0348395	P08123; P02452; P98160; P04004; P02461; P12109; P39060; P07585; P02679; P02675; P08572; P02766; P12111; P02462; P02671; P51884; P21810;
regulation of complement activation	12	108	2.6087	4.03696	4.20771e-05	0.493144	0.00675539	0.0382523	P05155; P02748; P04004; P01859; P01834; P01857; P10909; P01624; P01024; P0C0L5; P01615; P01619;
chaperone-mediated protein complex assembly	5	16	1.08696	11.3611	5.26927e-05	0.617559	0.00834539	0.0472556	P10809; P10909; P02743; P08238; P07900;
positive regulation of cholesterol esterification	4	9	0.869565	16.1583	6.41248e-05	0.751543	0.0095132	0.0538683	P02647; P06727; P02649; P02652;
fructose metabolic process	4	9	0.869565	16.1583	6.41248e-05	0.751543	0.0095132	0.0538683	O00757; P05062; P09467; P04075;
high-density lipoprotein particle clearance	4	9	0.869565	16.1583	6.41248e-05	0.751543	0.0095132	0.0538683	O60494; P02647; P02649; P02652;
chylomicron remodeling	4	9	0.869565	16.1583	6.41248e-05	0.751543	0.0095132	0.0538683	P02647; P06727; P02649; P02652;
tetrahydrofolate interconversion	4	9	0.869565	16.1583	6.41248e-05	0.751543	0.0095132	0.0538683	P11586; P34896; O95954; P34897;
high-density lipoprotein particle remodeling	5	17	1.08696	10.6932	7.29645e-05	0.855144	0.0105573	0.0597807	P02647; P06727; P02768; P02649; P02652;
reverse cholesterol transport	5	17	1.08696	10.6932	7.29645e-05	0.855144	0.0105573	0.0597807	P10909; P02647; P06727; P02649; P02652;
succinyl-CoA metabolic process	3	4	0.652174	27.252	8.13466e-05	0.953382	0.0108339	0.0613467	Q96I99; Q9P2R7; Q02218;
valine catabolic process	3	4	0.652174	27.252	8.13466e-05	0.953382	0.0108339	0.0613467	Q6NVY1; Q02252; P31937;
positive regulation of oxidative stress-induced intrinsic apoptotic signaling pathway	3	4	0.652174	27.252	8.13466e-05	0.953382	0.0108339	0.0613467	P00441; Q99497; P23246;
4-hydroxyproline catabolic process	3	4	0.652174	27.252	8.13466e-05	0.953382	0.0108339	0.0613467	P00505; P30038; Q86XE5;
positive regulation of hydrolase activity	3	4	0.652174	27.252	8.13466e-05	0.953382	0.0108339	0.0613467	P02647; P07148; P17900;
regulation of immune system process	3	4	0.652174	27.252	8.13466e-05	0.953382	0.0108339	0.0613467	P02763; P19440; P19652;
response to aluminum ion	3	4	0.652174	27.252	8.13466e-05	0.953382	0.0108339	0.0613467	P09417; P13716; P27338;
one-carbon metabolic process	6	28	1.30435	7.78999	9.50752e-05	1	0.01252	0.0708943	O75891; P00918; P11586; P00915; P23526; P34897;
translational elongation	4	10	0.869565	14.5441	0.00010455	1	0.01351	0.0765004	P13639; P26641; P29692; P49411;
osteoblast differentiation	11	101	2.3913	3.95729	0.000104899	1	0.01351	0.0765004	P02452; Q00610; P12109; P04040; P07910; P61604; P67936; P35232; P06576; P51659; Q00839;
nucleosome assembly	10	85	2.17391	4.27503	0.000112461	1	0.0143265	0.0811237	Q5SSJ5; Q71DI3; P06748; Q99879; Q16778; Q01105; P16403; P07305; P10412; P62805;
positive regulation of nitric oxide biosynthetic process	7	43	1.52174	5.91731	0.000156879	1	0.0195598	0.110757	P00966; P10909; Q9BYV1; O94760; P08238; P68871; P07900;
RNA metabolic process	7	43	1.52174	5.91731	0.000156879	1	0.0195598	0.110757	P22626; Q15365; P51991; Q14103; P07910; P61978; Q00839;
plasminogen activation	4	11	0.869565	13.2231	0.000160723	1	0.0196216	0.111107	P00558; P02679; P02675; P02671;
response to reactive oxygen species	4	11	0.869565	13.2231	0.000160723	1	0.0196216	0.111107	P04040; P09211; P02649; P05090;
toll-like receptor signaling pathway	7	44	1.52174	5.78285	0.000182187	1	0.0220127	0.124647	P06702; P02679; P05109; P02675; P09429; P02671; P14625;
regulation of mRNA stability	11	108	2.3913	3.70083	0.000191661	1	0.0222343	0.125901	P28072; P62987; P04792; Q14103; P08670; P49721; P11142; Q01105; P31946; Q9UL46; P63104;
tyrosine catabolic process	3	5	0.652174	21.8124	0.000199198	1	0.0222343	0.125901	P16930; P32754; Q93099;
regulation of intestinal cholesterol absorption	3	5	0.652174	21.8124	0.000199198	1	0.0222343	0.125901	P02647; P06727; P02652;
isocitrate metabolic process	3	5	0.652174	21.8124	0.000199198	1	0.0222343	0.125901	O75874; Q99798; P48735;
renal absorption	3	5	0.652174	21.8124	0.000199198	1	0.0222343	0.125901	P42330; O14745; P68871;
negative regulation of amyloid fibril formation	3	5	0.652174	21.8124	0.000199198	1	0.0222343	0.125901	P98160; P10909; P02511;
blood coagulation, fibrin clot formation	3	5	0.652174	21.8124	0.000199198	1	0.0222343	0.125901	P02679; P02675; P02671;
regulation of anion transport	3	5	0.652174	21.8124	0.000199198	1	0.0222343	0.125901	Q5T2W1; P00918; Q15907;
complement activation, classical pathway	12	127	2.6087	3.43305	0.000202708	1	0.0224126	0.126911	P05155; P01876; P02748; P01859; P01834; P01857; P10909; P01624; P01024; P0C0L5; P01615; P01619;
phospholipid efflux	4	12	0.869565	12.1221	0.00023585	1	0.0255941	0.144926	P02647; P06727; P02649; P02652;
oxidative phosphorylation	4	12	0.869565	12.1221	0.00023585	1	0.0255941	0.144926	P22695; P36542; P30049; P31930;
membrane organization	12	130	2.6087	3.35384	0.000252289	1	0.0271268	0.153605	P62258; Q00610; P62987; P98164; P63261; P02787; P59998; P11142; P27348; P31946; P60709; P63104;
blood coagulation	14	170	3.04348	2.99185	0.000264197	1	0.028149	0.159393	P01008; P08123; P02452; P02042; Q71DI3; P00740; P02679; P47756; P02675; P47755; P01009; P08758; P02671; P68871;
cornification	11	113	2.3913	3.53709	0.000285642	1	0.0299188	0.169414	P13646; P48668; P05783; P35527; P13647; P05787; P13645; P02533; P08727; P04264; P35908;
cellular iron ion homeostasis	8	62	1.73913	4.68971	0.000285913	1	0.0299188	0.169414	P02792; P00441; P62987; P38606; P02787; P02794; P21399; P02790;
high-density lipoprotein particle assembly	4	13	0.869565	11.1903	0.000333282	1	0.0340828	0.192993	P02647; P06727; P02649; P02652;
protein polymerization	4	13	0.869565	11.1903	0.000333282	1	0.0340828	0.192993	P04004; P02679; P02675; P02671;
negative regulation of apoptotic process	27	476	5.86957	2.06008	0.00033443	1	0.0340828	0.192993	P62987; P11021; P10809; P05783; Q99497; P04792; P32119; P04040; P30048; P0DMV9; P14174; P06748; P02511; P16444; P30044; P23528; P02768; P38646; P09211; P08758; P63104; P14625; P61978; Q99623; P09525; P07148; P29972;
response to zinc ion	6	35	1.30435	6.23244	0.000347974	1	0.0351574	0.199078	P00918; P46952; P13716; P05109; P02533; P50053;
regulation of blood pressure	8	64	1.73913	4.54318	0.000356766	1	0.0357376	0.202363	P08123; P00441; P51606; P04179; P15144; P05023; P34913; P68871;
fatty acid metabolic process	7	49	1.52174	5.19289	0.000362792	1	0.0360333	0.204038	Q9Y2S2; Q96CM8; P01024; P19440; P05413; P45954; P36269;
pyruvate biosynthetic process	3	6	0.652174	18.1831	0.00039024	1	0.0365889	0.207184	P30613; P14618; Q86XE5;
aspartate metabolic process	3	6	0.652174	18.1831	0.00039024	1	0.0365889	0.207184	P17174; P00505; P00966;
glycine metabolic process	3	6	0.652174	18.1831	0.00039024	1	0.0365889	0.207184	P34896; P34897; Q6IB77;
mitochondrial acetyl-CoA biosynthetic process from pyruvate	3	6	0.652174	18.1831	0.00039024	1	0.0365889	0.207184	P08559; P09622; P11177;
L-serine biosynthetic process	3	6	0.652174	18.1831	0.00039024	1	0.0365889	0.207184	O43175; Q9Y617; P34897;
positive regulation of interleukin-1 secretion	3	6	0.652174	18.1831	0.00039024	1	0.0365889	0.207184	P02763; P09429; P19652;
cellular oxidant detoxification	3	6	0.652174	18.1831	0.00039024	1	0.0365889	0.207184	P30041; P68871; P69905;
transferrin transport	6	36	1.30435	6.05936	0.000407971	1	0.0379478	0.214878	Q00610; P36543; P38606; P02787; P21281; Q15907;
glutamate metabolic process	4	14	0.869565	10.3916	0.000456483	1	0.0411537	0.233032	P17174; P00505; P51649; P19440;
response to fatty acid	4	14	0.869565	10.3916	0.000456483	1	0.0411537	0.233032	P04040; P13716; P35914; P05413;
protein refolding	4	14	0.869565	10.3916	0.000456483	1	0.0411537	0.233032	P10809; P0DMV9; P11142; P07900;
ATP synthesis coupled proton transport	4	14	0.869565	10.3916	0.000456483	1	0.0411537	0.233032	O75947; Q5VTU8; P30049; P24539;
generation of precursor metabolites and energy	7	51	1.52174	4.98928	0.000466378	1	0.0417248	0.236266	P12235; P13073; P09669; P36957; P06576; Q99798; Q02218;
response to activity	6	37	1.30435	5.89564	0.000475747	1	0.0422405	0.239186	P35558; P04040; P13716; P08572; Q16836; P31930;
response to oxidative stress	10	102	2.17391	3.5626	0.000505478	1	0.0445429	0.252223	O75306; P48637; O75874; P32119; P30048; P13716; Q6XQN6; P30044; P04264; P30041;
cellular amino acid biosynthetic process	5	25	1.08696	7.27276	0.000522259	1	0.0456782	0.258652	P17174; P00505; P00439; P00367; O94925;
response to calcium ion	7	53	1.52174	4.80104	0.000592277	1	0.0514184	0.291156	Q14103; P18827; P02679; P02675; P0DP25; P50995; P02671;
leukotriene metabolic process	4	15	0.869565	9.69927	0.000609	1	0.0520984	0.295006	Q14914; P16444; P19440; P36269;
fatty acid beta-oxidation using acyl-CoA oxidase	4	15	0.869565	9.69927	0.000609	1	0.0520984	0.295006	Q08426; Q9UHK6; P51659; P09110;
microtubule-based process	5	26	1.08696	6.99315	0.000632112	1	0.052594	0.297812	P68363; P07437; P68366; Q9BVA1; P68371;
sulfur amino acid metabolic process	3	7	0.652174	15.5892	0.000668959	1	0.052594	0.297812	Q93088; Q9H2M3; P23526;
internal protein amino acid acetylation	3	7	0.652174	15.5892	0.000668959	1	0.052594	0.297812	P40926; Q08426; P35558;
lipid metabolic process	11	125	2.3913	3.19756	0.000678721	1	0.052594	0.297812	P98160; P25705; P11498; P98164; P10909; Q99714; O14880; P35914; P16662; P06576; P05090;
liver development	8	71	1.73913	4.09533	0.000725276	1	0.052594	0.297812	P27144; P25325; Q14103; P09417; P14618; P35914; P24752; Q99798;
negative regulation of complement activation, lectin pathway	2	2	0.434783	36.3058	0.000757027	1	0.052594	0.297812	P05155; P01023;
gamma-aminobutyric acid catabolic process	2	2	0.434783	36.3058	0.000757027	1	0.052594	0.297812	P80404; P51649;
response to lipid hydroperoxide	2	2	0.434783	36.3058	0.000757027	1	0.052594	0.297812	P22352; P06727;
glycine biosynthetic process from serine	2	2	0.434783	36.3058	0.000757027	1	0.052594	0.297812	P34896; P34897;
glycine betaine biosynthetic process from choline	2	2	0.434783	36.3058	0.000757027	1	0.052594	0.297812	Q8NE62; P49419;
cyanate catabolic process	2	2	0.434783	36.3058	0.000757027	1	0.052594	0.297812	P25325; Q16762;
peptidyl-cysteine S-trans-nitrosylation	2	2	0.434783	36.3058	0.000757027	1	0.052594	0.297812	P06702; P04406;
medium-chain fatty-acyl-CoA metabolic process	2	2	0.434783	36.3058	0.000757027	1	0.052594	0.297812	Q08AH3; P51659;
heme metabolic process	2	2	0.434783	36.3058	0.000757027	1	0.052594	0.297812	Q9BUT1; P02790;
xylulose biosynthetic process	2	2	0.434783	36.3058	0.000757027	1	0.052594	0.297812	P29401; P37837;
hemolysis by symbiont of host erythrocytes	2	2	0.434783	36.3058	0.000757027	1	0.052594	0.297812	P02748; P02768;
positive regulation of neurofibrillary tangle assembly	2	2	0.434783	36.3058	0.000757027	1	0.052594	0.297812	P10909; P02649;
positive regulation of protein processing in phagocytic vesicle	2	2	0.434783	36.3058	0.000757027	1	0.052594	0.297812	P06396; P35579;
positive regulation of telomerase RNA reverse transcriptase activity	2	2	0.434783	36.3058	0.000757027	1	0.052594	0.297812	P22626; Q14103;
neutrophil aggregation	2	2	0.434783	36.3058	0.000757027	1	0.052594	0.297812	P06702; P05109;
glutamate catabolic process to 2-oxoglutarate	2	2	0.434783	36.3058	0.000757027	1	0.052594	0.297812	P17174; P00505;
glyoxylate cycle	2	2	0.434783	36.3058	0.000757027	1	0.052594	0.297812	O75874; P48735;
glutamate catabolic process to aspartate	2	2	0.434783	36.3058	0.000757027	1	0.052594	0.297812	P17174; P00505;
sucrose biosynthetic process	2	2	0.434783	36.3058	0.000757027	1	0.052594	0.297812	O00757; P09467;
regulation of amyloid-beta clearance	2	2	0.434783	36.3058	0.000757027	1	0.052594	0.297812	P10909; P02649;
establishment or maintenance of apical/basal cell polarity	2	2	0.434783	36.3058	0.000757027	1	0.052594	0.297812	Q9Y696; P15311;
chaperone-mediated protein transport involved in chaperone-mediated autophagy	2	2	0.434783	36.3058	0.000757027	1	0.052594	0.297812	P10909; P11142;
glyceraldehyde-3-phosphate biosynthetic process	2	2	0.434783	36.3058	0.000757027	1	0.052594	0.297812	P29401; P60174;
NADH oxidation	2	2	0.434783	36.3058	0.000757027	1	0.052594	0.297812	P05062; Q16822;
L-methionine salvage	2	2	0.434783	36.3058	0.000757027	1	0.052594	0.297812	Q93088; Q9H2M3;
amino-acid betaine catabolic process	2	2	0.434783	36.3058	0.000757027	1	0.052594	0.297812	Q93088; Q9UI17;
proton transport	5	27	1.08696	6.73424	0.000758395	1	0.052594	0.297812	P56134; P36543; P21281; P48047; P06576;
de novo' protein folding	4	16	0.869565	9.09345	0.000794436	1	0.054449	0.308316	P50990; P10809; P50991; P49368;
cellular response to nitric oxide	4	16	0.869565	9.09345	0.000794436	1	0.054449	0.308316	Q14103; P16444; O95831; P29972;
complement activation	9	91	1.95652	3.59427	0.000896437	1	0.0610828	0.34588	P01859; P01834; P01857; P10909; P01624; P01024; P0C0L5; P01615; P01619;
response to unfolded protein	6	42	1.30435	5.19394	0.00095591	1	0.0643866	0.364588	P10809; P04792; P61604; P11142; P08238; P07900;
bicarbonate transport	6	42	1.30435	5.19394	0.00095591	1	0.0643866	0.364588	P00918; P00915; P02730; P68871; P29972; P69905;
glutamine metabolic process	4	17	0.869565	8.55885	0.00101643	1	0.0680715	0.385454	P51649; P00367; Q9NQR4; Q969I3;
positive regulation of protein localization to Cajal body	3	8	0.652174	13.643	0.00104848	1	0.0682679	0.386566	P50990; P50991; P49368;
tetrahydrofolate metabolic process	3	8	0.652174	13.643	0.00104848	1	0.0682679	0.386566	P34896; Q9P0Z9; P34897;
neuron projection regeneration	3	8	0.652174	13.643	0.00104848	1	0.0682679	0.386566	P02647; P06727; P02649;
neurotransmitter catabolic process	3	8	0.652174	13.643	0.00104848	1	0.0682679	0.386566	P80404; P51649; P27338;
malate metabolic process	3	8	0.652174	13.643	0.00104848	1	0.0682679	0.386566	P40926; P07954; P40925;
regulation of mitochondrial membrane potential	5	29	1.08696	6.26997	0.00106624	1	0.0690403	0.390939	P00441; Q9H2U2; Q99497; P30048; P28331;
Fc-gamma receptor signaling pathway involved in phagocytosis	11	133	2.3913	3.00524	0.00113542	1	0.0731163	0.414019	P01859; P63261; P01834; P01857; P01624; P59998; P60709; P08238; P01615; P01619; P07900;
acyl-CoA metabolic process	5	30	1.08696	6.06104	0.00125088	1	0.0801111	0.453627	Q68CK6; Q96CM8; P35914; Q86TX2; Q6IB77;
folic acid metabolic process	4	18	0.869565	8.08362	0.00127862	1	0.0810023	0.458674	O75891; P11586; P34896; P34897;
blood coagulation, intrinsic pathway	4	18	0.869565	8.08362	0.00127862	1	0.0810023	0.458674	P05155; P01023; P00740; P01042;
aerobic respiration	5	31	1.08696	5.86559	0.00145812	1	0.0913858	0.51747	P40926; P21912; P04040; P22695; P31930;
nucleobase-containing small molecule interconversion	5	31	1.08696	5.86559	0.00145812	1	0.0913858	0.51747	P27144; P10599; P35754; P54819; P00390;
positive regulation of peptide hormone secretion	3	9	0.652174	12.1288	0.00154066	1	0.094537	0.535314	P02679; P02675; P02671;
collagen-activated tyrosine kinase receptor signaling pathway	3	9	0.652174	12.1288	0.00154066	1	0.094537	0.535314	P02452; P08572; P02462;
ATF6-mediated unfolded protein response	3	9	0.652174	12.1288	0.00154066	1	0.094537	0.535314	P11021; P14625; P27797;
ketone body biosynthetic process	3	9	0.652174	12.1288	0.00154066	1	0.094537	0.535314	P35914; Q9BUT1; P24752;
positive regulation of receptor-mediated endocytosis	4	19	0.869565	7.65839	0.00158465	1	0.0967298	0.54773	P04004; P02787; P10909; P61978;
leukocyte migration	14	205	3.04348	2.48107	0.00167652	1	0.101807	0.576483	P08123; P01876; P02452; P05026; P08195; P01834; P14174; P18827; P01624; P26038; P62937; P01615; P01619; P35579;
protein methylation	5	32	1.08696	5.68234	0.00168956	1	0.10207	0.577971	P13639; Q93088; P38117; P55072; P11142;
response to hypoxia	12	163	2.6087	2.67488	0.00188395	1	0.11323	0.641164	P05026; P80404; P30613; P04040; P00338; P13716; P14618; O43707; P02511; P23526; P14625; P27487;
cellular response to amino acid stimulus	6	48	1.30435	4.54484	0.00194636	1	0.116384	0.659024	P08123; P02452; P02461; P12109; Q14103; P02462;
membrane repolarization during cardiac muscle cell action potential	3	10	0.652174	10.9171	0.00215614	1	0.12165	0.68884	P62258; P05026; P05023;
mitochondrial electron transport, NADH to ubiquinone	6	49	1.30435	4.4521	0.00216732	1	0.12165	0.68884	O75306; O00483; O75489; P28331; P09622; P19404;
phagocytosis, engulfment	7	66	1.52174	3.85553	0.00220326	1	0.12165	0.68884	P01876; P01859; P01834; P01857; P06396; P01024; P35579;
nitric oxide transport	2	3	0.434783	24.244	0.00222956	1	0.12165	0.68884	P68871; P29972;
epoxide metabolic process	2	3	0.434783	24.244	0.00222956	1	0.12165	0.68884	P34913; P07099;
citrulline metabolic process	2	3	0.434783	24.244	0.00222956	1	0.12165	0.68884	P00966; O94760;
negative regulation of very-low-density lipoprotein particle remodeling	2	3	0.434783	24.244	0.00222956	1	0.12165	0.68884	P02647; P02652;
aldehyde catabolic process	2	3	0.434783	24.244	0.00222956	1	0.12165	0.68884	P14550; P06744;
chaperone-mediated autophagy	2	3	0.434783	24.244	0.00222956	1	0.12165	0.68884	P11142; P07900;
cytokinetic process	2	3	0.434783	24.244	0.00222956	1	0.12165	0.68884	P50995; P35579;
acetyl-CoA biosynthetic process from pyruvate	2	3	0.434783	24.244	0.00222956	1	0.12165	0.68884	P08559; P11177;
thymine catabolic process	2	3	0.434783	24.244	0.00222956	1	0.12165	0.68884	Q14117; Q02252;
aspartate biosynthetic process	2	3	0.434783	24.244	0.00222956	1	0.12165	0.68884	P17174; P00505;
proline catabolic process to glutamate	2	3	0.434783	24.244	0.00222956	1	0.12165	0.68884	Q9UF12; P30038;
glyoxylate catabolic process	2	3	0.434783	24.244	0.00222956	1	0.12165	0.68884	Q9BYV1; Q86XE5;
chemokine production	2	3	0.434783	24.244	0.00222956	1	0.12165	0.68884	P06702; P05109;
protein oxidation	2	3	0.434783	24.244	0.00222956	1	0.12165	0.68884	P02647; P02652;
protein targeting to lysosome involved in chaperone-mediated autophagy	2	3	0.434783	24.244	0.00222956	1	0.12165	0.68884	P10909; P11142;
positive regulation of substrate adhesion-dependent cell spreading	5	34	1.08696	5.34819	0.00223163	1	0.12165	0.68884	P02679; P02675; P02647; P02671; P27797;
cellular response to hypoxia	9	105	1.95652	3.11508	0.0024537	1	0.133136	0.753881	P42765; Q5SSJ5; P35558; P00558; P07237; Q99623; P07148; P02545; P29972;
binding of sperm to zona pellucida	5	35	1.08696	5.19542	0.00254557	1	0.136854	0.774932	P50990; P50991; P45880; P49368; P04075;
positive regulation of cell death	5	35	1.08696	5.19542	0.00254557	1	0.136854	0.774932	P42330; P35232; P68871; P00738; P69905;
hepatocyte apoptotic process	3	11	0.652174	9.92555	0.00290442	1	0.153333	0.868242	P05783; P05787; P06396;
virion assembly	3	11	0.652174	9.92555	0.00290442	1	0.153333	0.868242	P62987; P02649; P62937;
biotin metabolic process	3	11	0.652174	9.92555	0.00290442	1	0.153333	0.868242	P11498; P05166; P05165;
regulation of cholesterol metabolic process	3	11	0.652174	9.92555	0.00290442	1	0.153333	0.868242	P02649; P34913; P49748;
antimicrobial humoral response	6	52	1.30435	4.1953	0.0029444	1	0.154746	0.876247	P61626; P06702; P10909; P05109; P81605; P59666;
anion transport	3	12	0.652174	9.09911	0.00379395	1	0.196748	1	P45880; P21796; P02730;
positive regulation of heterotypic cell-cell adhesion	3	12	0.652174	9.09911	0.00379395	1	0.196748	1	P02679; P02675; P02671;
maintenance of gastrointestinal epithelium	3	12	0.652174	9.09911	0.00379395	1	0.196748	1	P02753; P01011; P30039;
response to toxic substance	8	92	1.73913	3.16062	0.00384857	1	0.198701	1	P25325; P18827; Q86WA6; P34913; P27338; O95831; P07099; Q6IB77;
cellular response to interleukin-4	4	24	0.869565	6.06356	0.00389681	1	0.199435	1	P11021; P68363; P13716; P08238;
cholesterol efflux	4	24	0.869565	6.06356	0.00389681	1	0.199435	1	P02647; P06727; P02649; P02652;
positive regulation of protein secretion	5	39	1.08696	4.6627	0.00412641	1	0.206885	1	P02679; P02675; P15311; P02671; P62937;
telomerase holoenzyme complex assembly	2	4	0.434783	18.1981	0.00437777	1	0.206885	1	P08238; P07900;
sequestering of calcium ion	2	4	0.434783	18.1981	0.00437777	1	0.206885	1	P14625; P27797;
proline catabolic process	2	4	0.434783	18.1981	0.00437777	1	0.206885	1	Q9UF12; P30038;
positive regulation of amyloid fibril formation	2	4	0.434783	18.1981	0.00437777	1	0.206885	1	P10909; P02649;
aspartate catabolic process	2	4	0.434783	18.1981	0.00437777	1	0.206885	1	P17174; P00505;
positive regulation of peptide secretion	2	4	0.434783	18.1981	0.00437777	1	0.206885	1	P06702; P05109;
sequestering of zinc ion	2	4	0.434783	18.1981	0.00437777	1	0.206885	1	P06702; P05109;
response to L-ascorbic acid	2	4	0.434783	18.1981	0.00437777	1	0.206885	1	P04040; P09211;
negative regulation of lipase activity	2	4	0.434783	18.1981	0.00437777	1	0.206885	1	P02647; P02652;
metanephric distal convoluted tubule development	2	4	0.434783	18.1981	0.00437777	1	0.206885	1	P05937; P07911;
positive regulation of dopamine metabolic process	2	4	0.434783	18.1981	0.00437777	1	0.206885	1	P80404; P27338;
transsulfuration	2	4	0.434783	18.1981	0.00437777	1	0.206885	1	P25325; P11586;
response to hydrostatic pressure	2	4	0.434783	18.1981	0.00437777	1	0.206885	1	P05787; P39060;
carbon dioxide transport	2	4	0.434783	18.1981	0.00437777	1	0.206885	1	P00918; P29972;
regulation of organelle assembly	2	4	0.434783	18.1981	0.00437777	1	0.206885	1	P26038; P15311;
actin filament fragmentation	2	4	0.434783	18.1981	0.00437777	1	0.206885	1	P60981; P23528;
peptidyl-cysteine S-nitrosylation	2	4	0.434783	18.1981	0.00437777	1	0.206885	1	P05109; P11766;
ATP hydrolysis coupled cation transmembrane transport	2	4	0.434783	18.1981	0.00437777	1	0.206885	1	O75947; P24539;
triglyceride catabolic process	4	25	0.869565	5.82111	0.00453958	1	0.211967	1	P02647; P02649; P05413; P07148;
cell aging	4	25	0.869565	5.82111	0.00453958	1	0.211967	1	P00441; P51888; P14174; P06748;
triglyceride homeostasis	4	25	0.869565	5.82111	0.00453958	1	0.211967	1	P02647; Q08AH3; P06727; P02649;
protein tetramerization	5	40	1.08696	4.54616	0.00461123	1	0.214459	1	P04040; P34896; P35914; Q9BTZ2; P34897;
keratinization	12	182	2.6087	2.39565	0.00464275	1	0.215071	1	P13646; P48668; P05783; P35527; P13647; P05787; P13645; P02533; P08727; P04264; P35908; Q86YZ3;
viral process	21	408	4.56522	1.86952	0.00469024	1	0.216416	1	P28072; P62258; P10809; P05783; P02760; P05787; P12235; P08670; P06748; P49721; P11142; Q01105; P62826; P21796; P31946; P05141; P08727; P61978; P02652; Q9Y490; P02790;
post-translational protein modification	19	356	4.13043	1.93863	0.00477194	1	0.218659	1	P28072; P01008; P02765; P02787; P02679; P49721; P02647; P01024; Q9UL46; P02768; P07237; P01009; P01042; P02649; P02671; P14625; Q15907; P02652; Q15084;
alpha-linolenic acid metabolic process	3	13	0.652174	8.39972	0.00483215	1	0.218659	1	P51659; P33121; P09110;
regulation of acetyl-CoA biosynthetic process from pyruvate	3	13	0.652174	8.39972	0.00483215	1	0.218659	1	P08559; P09622; P11177;
very long-chain fatty acid metabolic process	3	13	0.652174	8.39972	0.00483215	1	0.218659	1	Q86TX2; P51659; P09110;
actin filament capping	3	13	0.652174	8.39972	0.00483215	1	0.218659	1	Q01082; Q13813; P06396;
collagen fibril organization	5	41	1.08696	4.4353	0.00513521	1	0.231479	1	P08123; P02452; P02461; P07355; P51884;
pentose-phosphate shunt	3	14	0.652174	7.80017	0.00602551	1	0.263751	1	P29401; P60174; P37837;
negative regulation of blood coagulation	3	14	0.652174	7.80017	0.00602551	1	0.263751	1	P04004; P01042; P02649;
response to copper ion	3	14	0.652174	7.80017	0.00602551	1	0.263751	1	P00441; P30049; Q00796;
protein heterotrimerization	3	14	0.652174	7.80017	0.00602551	1	0.263751	1	P08123; P02452; P12109;
barbed-end actin filament capping	3	14	0.652174	7.80017	0.00602551	1	0.263751	1	P06396; P47756; P47755;
positive regulation of phosphoprotein phosphatase activity	3	14	0.652174	7.80017	0.00602551	1	0.263751	1	P0DP25; Q15257; P08238;
cellular response to gamma radiation	4	27	0.869565	5.39008	0.00603118	1	0.263751	1	P12956; P11021; Q9BVC6; P02511;
leukocyte cell-cell adhesion	4	27	0.869565	5.39008	0.00603118	1	0.263751	1	P26038; P06727; P15311; P07911;
cholesterol homeostasis	6	61	1.30435	3.57642	0.00653006	1	0.284507	1	P02647; P06727; P02649; P34913; P05413; P02652;
leucine catabolic process	2	5	0.434783	14.5658	0.00716348	1	0.29562	1	P35914; P26440;
protein peptidyl-prolyl isomerization	2	5	0.434783	14.5658	0.00716348	1	0.29562	1	P23284; P62937;
L-serine metabolic process	2	5	0.434783	14.5658	0.00716348	1	0.29562	1	P34896; P34897;
negative regulation of cellular protein metabolic process	2	5	0.434783	14.5658	0.00716348	1	0.29562	1	P14174; P02649;
glutamate biosynthetic process	2	5	0.434783	14.5658	0.00716348	1	0.29562	1	P00367; O94925;
short-chain fatty acid catabolic process	2	5	0.434783	14.5658	0.00716348	1	0.29562	1	P05166; P05165;
lactate metabolic process	2	5	0.434783	14.5658	0.00716348	1	0.29562	1	P00338; P07195;
lipoprotein biosynthetic process	2	5	0.434783	14.5658	0.00716348	1	0.29562	1	P02647; P02649;
hemoglobin metabolic process	2	5	0.434783	14.5658	0.00716348	1	0.29562	1	P04040; P02790;
heme transport	2	5	0.434783	14.5658	0.00716348	1	0.29562	1	P04196; P02790;
protein import	2	5	0.434783	14.5658	0.00716348	1	0.29562	1	P10909; P02649;
negative regulation of vascular endothelial growth factor signaling pathway	2	5	0.434783	14.5658	0.00716348	1	0.29562	1	P07585; P04196;
negative regulation of cholesterol biosynthetic process	2	5	0.434783	14.5658	0.00716348	1	0.29562	1	P00441; P02649;
membrane to membrane docking	2	5	0.434783	14.5658	0.00716348	1	0.29562	1	P26038; P15311;
response to superoxide	2	5	0.434783	14.5658	0.00716348	1	0.29562	1	P00441; P04179;
positive regulation of telomerase RNA localization to Cajal body	3	15	0.652174	7.2805	0.00737963	1	0.30031	1	P50990; P50991; P49368;
negative regulation of blood vessel endothelial cell migration	3	15	0.652174	7.2805	0.00737963	1	0.30031	1	P04196; P09429; P02649;
regulation of protein complex assembly	3	15	0.652174	7.2805	0.00737963	1	0.30031	1	P04196; P11142; P07900;
mitochondrial electron transport, ubiquinol to cytochrome c	3	15	0.652174	7.2805	0.00737963	1	0.30031	1	P99999; P22695; P31930;
response to insulin	6	63	1.30435	3.4629	0.00763294	1	0.307249	1	P35558; P04040; P40939; Q16836; P50053; P05413;
cholesterol metabolic process	6	63	1.30435	3.4629	0.00763294	1	0.307249	1	O60494; P04040; P02647; P06727; P02649; P02652;
response to estrogen	6	63	1.30435	3.4629	0.00763294	1	0.307249	1	P00918; P21266; P00338; P02647; P08727; P02652;
response to organic cyclic compound	5	45	1.08696	4.04114	0.00765502	1	0.307249	1	P49721; P24752; P51884; P07099; P33121;
glycosaminoglycan metabolic process	4	29	0.869565	5.01848	0.00781709	1	0.310564	1	P98160; P07585; P18827; P21810;
iron ion homeostasis	4	29	0.869565	5.01848	0.00781709	1	0.310564	1	P02792; P02787; Q96NB2; Q9BUT1;
toxin transport	4	29	0.869565	5.01848	0.00781709	1	0.310564	1	P50990; P11021; P50991; P49368;
cellular response to drug	6	64	1.30435	3.4088	0.008232	1	0.325943	1	P11021; P09417; P09467; P20711; P16444; P08238;
positive regulation of protein insertion into mitochondrial membrane involved in apoptotic signaling pathway	4	30	0.869565	4.85125	0.00882728	1	0.348336	1	P62258; P27348; P31946; P63104;
NAD metabolic process	3	16	0.652174	6.82575	0.0088993	1	0.348829	1	P00338; P07195; Q15274;
regulation of protein ubiquitination	3	16	0.652174	6.82575	0.0088993	1	0.348829	1	P0DMV9; P08238; P07900;
carbohydrate metabolic process	9	128	1.95652	2.55539	0.0089779	1	0.350736	1	O75390; P08195; P30837; P05091; O43488; P07195; P48735; P37837; P06744;
negative regulation of cysteine-type endopeptidase activity involved in apoptotic process	6	66	1.30435	3.30552	0.00953017	1	0.371075	1	P62258; P02511; P16444; P06744; P07148; P29972;
response to amino acid	4	31	0.869565	4.69481	0.00991901	1	0.384936	1	P48637; P13716; P23528; P09211;
peptide cross-linking via chondroitin 4-sulfate glycosaminoglycan	2	6	0.434783	12.1422	0.0105501	1	0.385394	1	P07585; P21810;
citrate metabolic process	2	6	0.434783	12.1422	0.0105501	1	0.385394	1	Q99798; P21399;
alcohol metabolic process	2	6	0.434783	12.1422	0.0105501	1	0.385394	1	P05091; Q9BTZ2;
thyroid hormone metabolic process	2	6	0.434783	12.1422	0.0105501	1	0.385394	1	P01266; Q14894;
induction of bacterial agglutination	2	6	0.434783	12.1422	0.0105501	1	0.385394	1	P02675; P02671;
histone H3-K27 trimethylation	2	6	0.434783	12.1422	0.0105501	1	0.385394	1	P16403; P10412;
thyroid hormone transport	2	6	0.434783	12.1422	0.0105501	1	0.385394	1	Q14894; P02766;
catecholamine biosynthetic process	2	6	0.434783	12.1422	0.0105501	1	0.385394	1	P00439; P20711;
pentose-phosphate shunt, non-oxidative branch	2	6	0.434783	12.1422	0.0105501	1	0.385394	1	P29401; P37837;
negative regulation of monocyte chemotactic protein-1 production	2	6	0.434783	12.1422	0.0105501	1	0.385394	1	P09211; P05090;
pore complex assembly	2	6	0.434783	12.1422	0.0105501	1	0.385394	1	P50990; P49368;
negative regulation of cytokine secretion involved in immune response	2	6	0.434783	12.1422	0.0105501	1	0.385394	1	P02647; P02652;
peptidyl-methionine modification	2	6	0.434783	12.1422	0.0105501	1	0.385394	1	P02647; P02652;
cardiolipin acyl-chain remodeling	2	6	0.434783	12.1422	0.0105501	1	0.385394	1	P55084; P40939;
peripheral nervous system axon regeneration	2	6	0.434783	12.1422	0.0105501	1	0.385394	1	P02647; P05090;
positive regulation of protein localization to early endosome	2	6	0.434783	12.1422	0.0105501	1	0.385394	1	P26038; P15311;
intracellular sequestering of iron ion	2	6	0.434783	12.1422	0.0105501	1	0.385394	1	P02792; P02794;
peptide catabolic process	3	17	0.652174	6.42448	0.0105885	1	0.385394	1	Q07075; P15144; Q9Y646;
intermediate filament organization	3	17	0.652174	6.42448	0.0105885	1	0.385394	1	P35527; P08670; P35908;
innate immune response in mucosa	3	17	0.652174	6.42448	0.0105885	1	0.385394	1	Q16778; P06727; P59666;
positive regulation of intrinsic apoptotic signaling pathway	4	32	0.869565	4.54814	0.0110946	1	0.402567	1	O14745; P06702; P10909; P05109;
astrocyte development	3	18	0.652174	6.06776	0.0124505	1	0.450368	1	P08670; P06702; P05109;
response to estradiol	7	91	1.52174	2.79643	0.0127764	1	0.460737	1	P13639; P02452; P04040; P02511; P09211; P06744; P27797;
cellular response to cAMP	5	51	1.08696	3.56581	0.0128752	1	0.462876	1	P35558; P11021; P15311; P29972; P21695;
reactive oxygen species metabolic process	4	34	0.869565	4.28068	0.0137064	1	0.485628	1	P00441; O75489; P28331; P34913;
lipoprotein metabolic process	3	19	0.652174	5.74857	0.0144878	1	0.485628	1	P02647; P06727; P02652;
retinol metabolic process	3	19	0.652174	5.74857	0.0144878	1	0.485628	1	P02753; P02766; P00352;
tissue regeneration	3	19	0.652174	5.74857	0.0144878	1	0.485628	1	P06396; Q9Y646; P05090;
apoptotic mitochondrial changes	3	19	0.652174	5.74857	0.0144878	1	0.485628	1	P10809; P12235; P28331;
heme catabolic process	2	7	0.434783	10.4101	0.0145026	1	0.485628	1	P02760; P30043;
positive regulation of apoptotic cell clearance	2	7	0.434783	10.4101	0.0145026	1	0.485628	1	P01024; P0C0L5;
response to selenium ion	2	7	0.434783	10.4101	0.0145026	1	0.485628	1	P13716; P27338;
very-low-density lipoprotein particle remodeling	2	7	0.434783	10.4101	0.0145026	1	0.485628	1	P06727; P02649;
negative regulation of acute inflammatory response	2	7	0.434783	10.4101	0.0145026	1	0.485628	1	P02743; P09211;
negative regulation of protein export from nucleus	2	7	0.434783	10.4101	0.0145026	1	0.485628	1	Q99497; P10599;
negative regulation of protein dephosphorylation	2	7	0.434783	10.4101	0.0145026	1	0.485628	1	P31946; Q15257;
purine nucleobase biosynthetic process	2	7	0.434783	10.4101	0.0145026	1	0.485628	1	P11586; P34896;
cell differentiation involved in embryonic placenta development	2	7	0.434783	10.4101	0.0145026	1	0.485628	1	P05787; P08727;
negative regulation of platelet-derived growth factor receptor signaling pathway	2	7	0.434783	10.4101	0.0145026	1	0.485628	1	O14745; P05090;
actin filament severing	2	7	0.434783	10.4101	0.0145026	1	0.485628	1	P60981; P06396;
arginine catabolic process	2	7	0.434783	10.4101	0.0145026	1	0.485628	1	P16930; O94760;
negative regulation of amyloid-beta formation	2	7	0.434783	10.4101	0.0145026	1	0.485628	1	P10909; P02649;
regulation of Cdc42 protein signal transduction	2	7	0.434783	10.4101	0.0145026	1	0.485628	1	P02647; P02649;
long-chain fatty acid import	2	7	0.434783	10.4101	0.0145026	1	0.485628	1	P05413; P33121;
actin filament depolymerization	2	7	0.434783	10.4101	0.0145026	1	0.485628	1	P60981; P23528;
sodium ion export across plasma membrane	2	7	0.434783	10.4101	0.0145026	1	0.485628	1	P05026; P05023;
gland morphogenesis	2	7	0.434783	10.4101	0.0145026	1	0.485628	1	O14745; P26038;
negative regulation of oxidoreductase activity	2	7	0.434783	10.4101	0.0145026	1	0.485628	1	P30044; P00738;
triglyceride metabolic process	4	36	0.869565	4.04293	0.0166785	1	0.549927	1	P04040; P02649; P02652; P33121;
activation of innate immune response	3	20	0.652174	5.46129	0.0167024	1	0.549927	1	P12956; P09429; P23246;
cellular protein complex assembly	3	20	0.652174	5.46129	0.0167024	1	0.549927	1	P02679; P02675; P02671;
natural killer cell mediated cytotoxicity	3	20	0.652174	5.46129	0.0167024	1	0.549927	1	Q06830; P07437; P68371;
regulation of hematopoietic stem cell differentiation	6	75	1.30435	2.90891	0.017205	1	0.549927	1	P28072; P62987; Q71DI3; P49721; Q9UL46; P62805;
antimicrobial humoral immune response mediated by antimicrobial peptide	7	97	1.52174	2.62348	0.0176476	1	0.549927	1	P06702; Q16778; P04196; P01042; P81605; P59666; P04406;
regulation of cellular response to heat	6	76	1.30435	2.87064	0.0182603	1	0.549927	1	P62258; P0DMV9; P11142; P02511; P08238; P07900;
positive regulation of early endosome to late endosome transport	2	8	0.434783	9.11043	0.0189872	1	0.549927	1	P26038; P15311;
cellular potassium ion homeostasis	2	8	0.434783	9.11043	0.0189872	1	0.549927	1	P05026; P05023;
doxorubicin metabolic process	2	8	0.434783	9.11043	0.0189872	1	0.549927	1	P42330; O43488;
regulation of stress-activated MAPK cascade	2	8	0.434783	9.11043	0.0189872	1	0.549927	1	Q06830; P09211;
hydrogen peroxide biosynthetic process	2	8	0.434783	9.11043	0.0189872	1	0.549927	1	P00441; P27338;
positive regulation of ATP biosynthetic process	2	8	0.434783	9.11043	0.0189872	1	0.549927	1	P55072; P06733;
establishment of integrated proviral latency	2	8	0.434783	9.11043	0.0189872	1	0.549927	1	P12956; P62937;
regulation of cell death	2	8	0.434783	9.11043	0.0189872	1	0.549927	1	P29692; P02511;
positive regulation by host of viral genome replication	2	8	0.434783	9.11043	0.0189872	1	0.549927	1	P23284; P11142;
daunorubicin metabolic process	2	8	0.434783	9.11043	0.0189872	1	0.549927	1	P42330; O43488;
nucleosome positioning	2	8	0.434783	9.11043	0.0189872	1	0.549927	1	P16403; P10412;
negative regulation of mitochondrial outer membrane permeabilization involved in apoptotic signaling pathway	2	8	0.434783	9.11043	0.0189872	1	0.549927	1	P42765; P05141;
oxygen transport	2	8	0.434783	9.11043	0.0189872	1	0.549927	1	P68871; P69905;
establishment of Golgi localization	2	8	0.434783	9.11043	0.0189872	1	0.549927	1	O14745; P63104;
positive regulation of triglyceride catabolic process	2	8	0.434783	9.11043	0.0189872	1	0.549927	1	P02647; P06727;
positive regulation of exocytosis	3	21	0.652174	5.20135	0.0190957	1	0.549927	1	P02679; P02675; P02671;
regulation of cytoskeleton organization	3	21	0.652174	5.20135	0.0190957	1	0.549927	1	P06702; P05109; Q9Y696;
angiogenesis	12	221	2.6087	1.97291	0.0197465	1	0.549927	1	P98160; P39060; P07355; P04196; Q07075; P08572; P15144; Q9Y696; P06576; P06744; P05090; P35579;
response to cold	4	38	0.869565	3.8302	0.0200246	1	0.549927	1	P00403; P10809; P49748; P07900;
IRE1-mediated unfolded protein response	5	58	1.08696	3.13553	0.0215029	1	0.549927	1	P11021; P49748; Q9Y490; P02545; Q15084;
antibacterial humoral response	4	39	0.869565	3.73202	0.0218416	1	0.549927	1	P01876; Q16778; P01619; P59666;
activation of cysteine-type endopeptidase activity involved in apoptotic process	6	80	1.30435	2.72713	0.0229235	1	0.549927	1	P10809; P55072; P06702; P05109; P61604; O95831;
negative regulation of cell death	5	59	1.08696	3.08239	0.0229803	1	0.549927	1	P98160; Q99497; P0DMV9; Q9BVC6; P10909;
skin morphogenesis	2	9	0.434783	8.09929	0.023972	1	0.549927	1	P08123; P02452;
response to folic acid	2	9	0.434783	8.09929	0.023972	1	0.549927	1	P13639; P06396;
potassium ion import across plasma membrane	2	9	0.434783	8.09929	0.023972	1	0.549927	1	P05026; P05023;
positive regulation of establishment of protein localization to telomere	2	9	0.434783	8.09929	0.023972	1	0.549927	1	P50990; P50991;
cellular protein complex localization	2	9	0.434783	8.09929	0.023972	1	0.549927	1	P62826; P15311;
leukocyte migration involved in inflammatory response	2	9	0.434783	8.09929	0.023972	1	0.549927	1	P06702; P05109;
L-ascorbic acid metabolic process	2	9	0.434783	8.09929	0.023972	1	0.549927	1	P00167; P78417;
positive regulation of actin filament depolymerization	2	9	0.434783	8.09929	0.023972	1	0.549927	1	P60981; P23528;
phospholipid homeostasis	2	9	0.434783	8.09929	0.023972	1	0.549927	1	P02647; P05413;
positive regulation of ryanodine-sensitive calcium-release channel activity	2	9	0.434783	8.09929	0.023972	1	0.549927	1	P0DP25; P78417;
erythrocyte homeostasis	2	9	0.434783	8.09929	0.023972	1	0.549927	1	Q06830; P06744;
blood vessel endothelial cell migration	2	9	0.434783	8.09929	0.023972	1	0.549927	1	P02647; P35579;
positive regulation of tumor necrosis factor secretion	2	9	0.434783	8.09929	0.023972	1	0.549927	1	P02763; P19652;
mitochondrial calcium ion transmembrane transport	3	23	0.652174	4.74925	0.024421	1	0.549927	1	P21796; P35232; Q99623;
positive regulation of insulin secretion	4	41	0.869565	3.55001	0.0257691	1	0.549927	1	P80404; P02753; Q16822; P00367;
negative regulation of cell cycle arrest	3	24	0.652174	4.55145	0.027353	1	0.549927	1	P14174; P08238; P27797;
cellular respiration	3	24	0.652174	4.55145	0.027353	1	0.549927	1	P99999; O75489; P28331;
protein export from nucleus	3	24	0.652174	4.55145	0.027353	1	0.549927	1	P62826; P38646; P27797;
negative regulation of lipid transport across blood brain barrier	1	1	0.217391	36.3058	0.0275433	1	0.549927	1	P02649;
regulation of sodium:proton antiporter activity	1	1	0.217391	36.3058	0.0275433	1	0.549927	1	O14745;
renal phosphate ion absorption	1	1	0.217391	36.3058	0.0275433	1	0.549927	1	O14745;
post-embryonic animal organ development	1	1	0.217391	36.3058	0.0275433	1	0.549927	1	P00338;
maintenance of location in cell	1	1	0.217391	36.3058	0.0275433	1	0.549927	1	P02649;
negative regulation of lipoprotein lipid oxidation	1	1	0.217391	36.3058	0.0275433	1	0.549927	1	P05090;
glutathione transport	1	1	0.217391	36.3058	0.0275433	1	0.549927	1	O14745;
serine family amino acid biosynthetic process	1	1	0.217391	36.3058	0.0275433	1	0.549927	1	P11586;
lipid transport involved in lipid storage	1	1	0.217391	36.3058	0.0275433	1	0.549927	1	P02649;
positive regulation of Lys63-specific deubiquitinase activity	1	1	0.217391	36.3058	0.0275433	1	0.549927	1	P55072;
flavin adenine dinucleotide catabolic process	1	1	0.217391	36.3058	0.0275433	1	0.549927	1	P55072;
positive regulation of lipid transport across blood brain barrier	1	1	0.217391	36.3058	0.0275433	1	0.549927	1	P02649;
positive regulation of heparan sulfate proteoglycan binding	1	1	0.217391	36.3058	0.0275433	1	0.549927	1	P02649;
sterol regulatory element binding protein import into nucleus	1	1	0.217391	36.3058	0.0275433	1	0.549927	1	P02545;
organonitrogen compound catabolic process	1	1	0.217391	36.3058	0.0275433	1	0.549927	1	P52758;
regulation of cellular response to very-low-density lipoprotein particle stimulus	1	1	0.217391	36.3058	0.0275433	1	0.549927	1	P02649;
positive regulation of postsynaptic membrane organization	1	1	0.217391	36.3058	0.0275433	1	0.549927	1	P02649;
positive regulation of cell aging	1	1	0.217391	36.3058	0.0275433	1	0.549927	1	P02545;
negative regulation of postsynaptic membrane organization	1	1	0.217391	36.3058	0.0275433	1	0.549927	1	P02649;
negative regulation of phospholipid efflux	1	1	0.217391	36.3058	0.0275433	1	0.549927	1	P02649;
positive regulation of heparan sulfate binding	1	1	0.217391	36.3058	0.0275433	1	0.549927	1	P02649;
negative regulation of presynaptic membrane organization	1	1	0.217391	36.3058	0.0275433	1	0.549927	1	P02649;
glucuronoside catabolic process	1	1	0.217391	36.3058	0.0275433	1	0.549927	1	Q9NUJ1;
positive regulation of complement activation	1	1	0.217391	36.3058	0.0275433	1	0.549927	1	P35232;
peptide antigen assembly with MHC class I protein complex	1	1	0.217391	36.3058	0.0275433	1	0.549927	1	P27797;
negative regulation of development of symbiont involved in interaction with host	1	1	0.217391	36.3058	0.0275433	1	0.549927	1	P07355;
catabolism by host of symbiont protein	1	1	0.217391	36.3058	0.0275433	1	0.549927	1	P07355;
regulation of presynaptic cytosolic calcium ion concentration	1	1	0.217391	36.3058	0.0275433	1	0.549927	1	P05937;
regulation of testosterone biosynthetic process	1	1	0.217391	36.3058	0.0275433	1	0.549927	1	P42330;
multicellular organismal macromolecule metabolic process	1	1	0.217391	36.3058	0.0275433	1	0.549927	1	P42330;
positive regulation of low-density lipoprotein receptor activity	1	1	0.217391	36.3058	0.0275433	1	0.549927	1	P07355;
positive regulation of axon guidance	1	1	0.217391	36.3058	0.0275433	1	0.549927	1	Q9BVA1;
positive regulation of low-density lipoprotein particle clearance	1	1	0.217391	36.3058	0.0275433	1	0.549927	1	P07355;
positive regulation of low-density lipoprotein particle receptor binding	1	1	0.217391	36.3058	0.0275433	1	0.549927	1	P07355;
negative regulation of retinoic acid biosynthetic process	1	1	0.217391	36.3058	0.0275433	1	0.549927	1	P42330;
positive regulation of tyrosine 3-monooxygenase activity	1	1	0.217391	36.3058	0.0275433	1	0.549927	1	Q99497;
miRNA transport	1	1	0.217391	36.3058	0.0275433	1	0.549927	1	P22626;
nicotinate nucleotide salvage	1	1	0.217391	36.3058	0.0275433	1	0.549927	1	Q6XQN6;
quinolinate catabolic process	1	1	0.217391	36.3058	0.0275433	1	0.549927	1	Q15274;
nicotinamide riboside catabolic process	1	1	0.217391	36.3058	0.0275433	1	0.549927	1	P00491;
inosine catabolic process	1	1	0.217391	36.3058	0.0275433	1	0.549927	1	P00491;
negative regulation of cholesterol transporter activity	1	1	0.217391	36.3058	0.0275433	1	0.549927	1	P02652;
regulation of blood coagulation, intrinsic pathway	1	1	0.217391	36.3058	0.0275433	1	0.549927	1	P01008;
negative regulation of cell adhesion molecule production	1	1	0.217391	36.3058	0.0275433	1	0.549927	1	P02647;
response to muscle inactivity	1	1	0.217391	36.3058	0.0275433	1	0.549927	1	P14618;
protein-lipid complex assembly	1	1	0.217391	36.3058	0.0275433	1	0.549927	1	P06727;
metanephric connecting tubule development	1	1	0.217391	36.3058	0.0275433	1	0.549927	1	P05937;
glycolate biosynthetic process	1	1	0.217391	36.3058	0.0275433	1	0.549927	1	Q99497;
starch catabolic process	1	1	0.217391	36.3058	0.0275433	1	0.549927	1	O43451;
glyoxal metabolic process	1	1	0.217391	36.3058	0.0275433	1	0.549927	1	Q99497;
enzyme active site formation via L-cysteine sulfinic acid	1	1	0.217391	36.3058	0.0275433	1	0.549927	1	Q99497;
siderophore biosynthetic process	1	1	0.217391	36.3058	0.0275433	1	0.549927	1	Q9BUT1;
glutathione deglycation	1	1	0.217391	36.3058	0.0275433	1	0.549927	1	Q99497;
amino-acid betaine metabolic process	1	1	0.217391	36.3058	0.0275433	1	0.549927	1	Q93088;
propionyl-CoA biosynthetic process	1	1	0.217391	36.3058	0.0275433	1	0.549927	1	P24752;
metanephric proximal convoluted tubule development	1	1	0.217391	36.3058	0.0275433	1	0.549927	1	P24752;
guanine deglycation	1	1	0.217391	36.3058	0.0275433	1	0.549927	1	Q99497;
guanine deglycation, glyoxal removal	1	1	0.217391	36.3058	0.0275433	1	0.549927	1	Q99497;
guanine deglycation, methylglyoxal removal	1	1	0.217391	36.3058	0.0275433	1	0.549927	1	Q99497;
asparagine metabolic process	1	1	0.217391	36.3058	0.0275433	1	0.549927	1	Q9NQR4;
regulation of eIF2 alpha phosphorylation by dsRNA	1	1	0.217391	36.3058	0.0275433	1	0.549927	1	P06748;
negative regulation of glucocorticoid biosynthetic process	1	1	0.217391	36.3058	0.0275433	1	0.549927	1	P05023;
argininosuccinate metabolic process	1	1	0.217391	36.3058	0.0275433	1	0.549927	1	P00966;
regulation of endoribonuclease activity	1	1	0.217391	36.3058	0.0275433	1	0.549927	1	P06748;
positive regulation of striated muscle contraction	1	1	0.217391	36.3058	0.0275433	1	0.549927	1	P05023;
mitotic spindle organization in nucleus	1	1	0.217391	36.3058	0.0275433	1	0.549927	1	Q15257;
positive regulation of prostaglandin secretion involved in immune response	1	1	0.217391	36.3058	0.0275433	1	0.549927	1	P14174;
detoxification of mercury ion	1	1	0.217391	36.3058	0.0275433	1	0.549927	1	Q99497;
positive regulation of myeloid leukocyte cytokine production involved in immune response	1	1	0.217391	36.3058	0.0275433	1	0.549927	1	P14174;
thymine metabolic process	1	1	0.217391	36.3058	0.0275433	1	0.549927	1	Q02252;
rRNA transport	1	1	0.217391	36.3058	0.0275433	1	0.549927	1	Q16762;
cellular response to glyoxal	1	1	0.217391	36.3058	0.0275433	1	0.549927	1	Q99497;
protein deglycation, glyoxal removal	1	1	0.217391	36.3058	0.0275433	1	0.549927	1	Q99497;
protein deglycation, methylglyoxal removal	1	1	0.217391	36.3058	0.0275433	1	0.549927	1	Q99497;
regulation of supramolecular fiber organization	1	1	0.217391	36.3058	0.0275433	1	0.549927	1	Q99497;
positive regulation of pyrroline-5-carboxylate reductase activity	1	1	0.217391	36.3058	0.0275433	1	0.549927	1	Q99497;
positive regulation of cation transmembrane transport	1	1	0.217391	36.3058	0.0275433	1	0.549927	1	Q5T2W1;
reactive nitrogen species metabolic process	1	1	0.217391	36.3058	0.0275433	1	0.549927	1	P30044;
carbon dioxide transmembrane transport	1	1	0.217391	36.3058	0.0275433	1	0.549927	1	P29972;
uncoating of virus	1	1	0.217391	36.3058	0.0275433	1	0.549927	1	P62937;
regulation of protein homooligomerization	1	1	0.217391	36.3058	0.0275433	1	0.549927	1	P02649;
glycerol biosynthetic process from pyruvate	1	1	0.217391	36.3058	0.0275433	1	0.549927	1	P35558;
renal sodium ion transport	1	1	0.217391	36.3058	0.0275433	1	0.549927	1	O14745;
maintenance of symbiont-containing vacuole by host	1	1	0.217391	36.3058	0.0275433	1	0.549927	1	P29972;
sesquiterpenoid metabolic process	1	1	0.217391	36.3058	0.0275433	1	0.549927	1	P51648;
regulation of apoptosis involved in tissue homeostasis	1	1	0.217391	36.3058	0.0275433	1	0.549927	1	P30044;
negative regulation of TRAIL-activated apoptotic signaling pathway	1	1	0.217391	36.3058	0.0275433	1	0.549927	1	Q99497;
peptidyl-arginine deglycation	1	1	0.217391	36.3058	0.0275433	1	0.549927	1	Q99497;
ketone body metabolic process	1	1	0.217391	36.3058	0.0275433	1	0.549927	1	P24752;
regulation of homocysteine metabolic process	1	1	0.217391	36.3058	0.0275433	1	0.549927	1	Q93088;
negative regulation of death-inducing signaling complex assembly	1	1	0.217391	36.3058	0.0275433	1	0.549927	1	Q99497;
positive regulation of L-dopa biosynthetic process	1	1	0.217391	36.3058	0.0275433	1	0.549927	1	Q99497;
positive regulation of L-dopa decarboxylase activity	1	1	0.217391	36.3058	0.0275433	1	0.549927	1	Q99497;
positive regulation of oxidative phosphorylation uncoupler activity	1	1	0.217391	36.3058	0.0275433	1	0.549927	1	Q99497;
S-methylmethionine metabolic process	1	1	0.217391	36.3058	0.0275433	1	0.549927	1	Q9H2M3;
peptidyl-cysteine deglycation	1	1	0.217391	36.3058	0.0275433	1	0.549927	1	Q99497;
